# Supplementary material for: Guideline appraisal with AGREE II: online survey of the potential influence of AGREE II items on overall assessment of guideline quality and recommendation for use
Source: PubMed Central journal article supplement (PMC5828401; doi:10.1186/s12913-018-2954-8), 2018-02-27
Supplement: 12913_2018_2954_MOESM2_ESM.pdf [file 12913_2018_2954_MOESM2_ESM.pdf]

**Results (raw data of 58 respondents) of the assessment of the strength of the potential influence of the AGREE II items on the two overall assessments**

| No of respondent | Profession            | Knowledge of the AGREE II instrument | Performance of appraisals using the AGREE I or II instrument | Number of appraised guidelines using the AGREE I or II instrument | Experience in years | Involvement in guideline development | Purpose of conducting appraisals using the AGREE I or II instrument | AGREE II Items | Assessment of the influence on <u>methodological quality</u> | Assessment of the influence on <u>recommendation for use</u> |
|------------------|-----------------------|--------------------------------------|--------------------------------------------------------------|-------------------------------------------------------------------|---------------------|--------------------------------------|---------------------------------------------------------------------|----------------|--------------------------------------------------------------|--------------------------------------------------------------|
| 1                | methodological expert | yes                                  | 10-20 guidelines                                             | -                                                                 | -                   | yes                                  | -                                                                   | 1              | 0                                                            | 2                                                            |
|                  |                       |                                      |                                                              |                                                                   |                     |                                      |                                                                     | 2              | 4                                                            | 1                                                            |
|                  |                       |                                      |                                                              |                                                                   |                     |                                      |                                                                     | 3              | 5                                                            | 5                                                            |
|                  |                       |                                      |                                                              |                                                                   |                     |                                      |                                                                     | 4              | 5                                                            | 5                                                            |
|                  |                       |                                      |                                                              |                                                                   |                     |                                      |                                                                     | 5              | 5                                                            | 5                                                            |
|                  |                       |                                      |                                                              |                                                                   |                     |                                      |                                                                     | 6              | 0                                                            | 5                                                            |
|                  |                       |                                      |                                                              |                                                                   |                     |                                      |                                                                     | 7              | 5                                                            | 5                                                            |
|                  |                       |                                      |                                                              |                                                                   |                     |                                      |                                                                     | 8              | 5                                                            | 5                                                            |
|                  |                       |                                      |                                                              |                                                                   |                     |                                      |                                                                     | 9              | 5                                                            | 5                                                            |
|                  |                       |                                      |                                                              |                                                                   |                     |                                      |                                                                     | 10             | 5                                                            | 5                                                            |
|                  |                       |                                      |                                                              |                                                                   |                     |                                      |                                                                     | 11             | 5                                                            | 5                                                            |
|                  |                       |                                      |                                                              |                                                                   |                     |                                      |                                                                     | 12             | 5                                                            | 3                                                            |
|                  |                       |                                      |                                                              |                                                                   |                     |                                      |                                                                     | 13             | 5                                                            | 5                                                            |
|                  |                       |                                      |                                                              |                                                                   |                     |                                      |                                                                     | 14             | 5                                                            | 5                                                            |
|                  |                       |                                      |                                                              |                                                                   |                     |                                      |                                                                     | 15             | 3                                                            | 5                                                            |
|                  |                       |                                      |                                                              |                                                                   |                     |                                      |                                                                     | 16             | 5                                                            | 5                                                            |
|                  |                       |                                      |                                                              |                                                                   |                     |                                      |                                                                     | 17             | 5                                                            | 5                                                            |
|                  |                       |                                      |                                                              |                                                                   |                     |                                      |                                                                     | 18             | 0                                                            | 5                                                            |
|                  |                       |                                      |                                                              |                                                                   |                     |                                      |                                                                     | 19             | 0                                                            | 5                                                            |

| No of respondent | Profession | Knowledge of the AGREE II instrument | Performance of appraisals using the AGREE I or II instrument | Number of appraised guidelines using the AGREE I or II instrument | Experience in years | Involvement in guideline development | Purpose of conducting appraisals using the AGREE I or II instrument | AGREE II Items | Assessment of the influence on <u>methodological quality</u> | Assessment of the influence on <u>recommendation for use</u> |
|------------------|------------|--------------------------------------|--------------------------------------------------------------|-------------------------------------------------------------------|---------------------|--------------------------------------|---------------------------------------------------------------------|----------------|--------------------------------------------------------------|--------------------------------------------------------------|
|                  |            |                                      |                                                              |                                                                   |                     |                                      |                                                                     | 20             | 0                                                            | 5                                                            |
|                  |            |                                      |                                                              |                                                                   |                     |                                      |                                                                     | 21             | 0                                                            | 5                                                            |
|                  |            |                                      |                                                              |                                                                   |                     |                                      |                                                                     | 22             | 5                                                            | 5                                                            |
|                  |            |                                      |                                                              |                                                                   |                     |                                      |                                                                     | 23             | 5                                                            | 5                                                            |
| 2                | Physician  | yes                                  | yes                                                          | < 10 guidelines                                                   | 1-5 years           | yes                                  | Assessment of guideline quality                                     | 1              | 3                                                            | 3                                                            |
|                  |            |                                      |                                                              |                                                                   |                     |                                      |                                                                     | 2              | 3                                                            | 3                                                            |
|                  |            |                                      |                                                              |                                                                   |                     |                                      |                                                                     | 3              | 3                                                            | 3                                                            |
|                  |            |                                      |                                                              |                                                                   |                     |                                      |                                                                     | 4              | 3                                                            | 3                                                            |
|                  |            |                                      |                                                              |                                                                   |                     |                                      |                                                                     | 5              | 3                                                            | 3                                                            |
|                  |            |                                      |                                                              |                                                                   |                     |                                      |                                                                     | 6              | 3                                                            | 3                                                            |
|                  |            |                                      |                                                              |                                                                   |                     |                                      |                                                                     | 7              | 3                                                            | 3                                                            |
|                  |            |                                      |                                                              |                                                                   |                     |                                      |                                                                     | 8              | 3                                                            | 3                                                            |
|                  |            |                                      |                                                              |                                                                   |                     |                                      |                                                                     | 9              | 3                                                            | 3                                                            |
|                  |            |                                      |                                                              |                                                                   |                     |                                      |                                                                     | 10             | 3                                                            | 3                                                            |
|                  |            |                                      |                                                              |                                                                   |                     |                                      |                                                                     | 11             | 3                                                            | 3                                                            |
|                  |            |                                      |                                                              |                                                                   |                     |                                      |                                                                     | 12             | 3                                                            | 3                                                            |
|                  |            |                                      |                                                              |                                                                   |                     |                                      |                                                                     | 13             | 3                                                            | 3                                                            |
|                  |            |                                      |                                                              |                                                                   |                     |                                      |                                                                     | 14             | 3                                                            | 3                                                            |
|                  |            |                                      |                                                              |                                                                   |                     |                                      |                                                                     | 15             | 3                                                            | 3                                                            |
|                  |            |                                      |                                                              |                                                                   |                     |                                      |                                                                     | 16             | 3                                                            | 3                                                            |
|                  |            |                                      |                                                              |                                                                   |                     |                                      |                                                                     | 17             | 3                                                            | 3                                                            |

| No of respondent | Profession | Knowledge of the AGREE II instrument | Performance of appraisals using the AGREE I or II instrument | Number of appraised guidelines using the AGREE I or II instrument | Experience in years | Involvement in guideline development | Purpose of conducting appraisals using the AGREE I or II instrument | AGREE II Items | Assessment of the influence on <u>methodological quality</u> | Assessment of the influence on <u>recommendation for use</u> |
|------------------|------------|--------------------------------------|--------------------------------------------------------------|-------------------------------------------------------------------|---------------------|--------------------------------------|---------------------------------------------------------------------|----------------|--------------------------------------------------------------|--------------------------------------------------------------|
|                  |            |                                      |                                                              |                                                                   |                     |                                      |                                                                     | 18             | 3                                                            | 3                                                            |
|                  |            |                                      |                                                              |                                                                   |                     |                                      |                                                                     | 19             | 3                                                            | 3                                                            |
|                  |            |                                      |                                                              |                                                                   |                     |                                      |                                                                     | 20             | 3                                                            | 3                                                            |
|                  |            |                                      |                                                              |                                                                   |                     |                                      |                                                                     | 21             | 3                                                            | 3                                                            |
|                  |            |                                      |                                                              |                                                                   |                     |                                      |                                                                     | 22             | 3                                                            | 3                                                            |
|                  |            |                                      |                                                              |                                                                   |                     |                                      |                                                                     | 23             | 3                                                            | 3                                                            |
| 3 <sup>b</sup>   | Physician  | no                                   | no                                                           | -                                                                 | -                   | no                                   | -                                                                   | 1              | -                                                            | -                                                            |
|                  |            |                                      |                                                              |                                                                   |                     |                                      |                                                                     | 2              | -                                                            | -                                                            |
|                  |            |                                      |                                                              |                                                                   |                     |                                      |                                                                     | 3              | -                                                            | -                                                            |
|                  |            |                                      |                                                              |                                                                   |                     |                                      |                                                                     | 4              | -                                                            | -                                                            |
|                  |            |                                      |                                                              |                                                                   |                     |                                      |                                                                     | 5              | -                                                            | -                                                            |
|                  |            |                                      |                                                              |                                                                   |                     |                                      |                                                                     | 6              | -                                                            | -                                                            |
|                  |            |                                      |                                                              |                                                                   |                     |                                      |                                                                     | 7              | -                                                            | -                                                            |
|                  |            |                                      |                                                              |                                                                   |                     |                                      |                                                                     | 8              | -                                                            | -                                                            |
|                  |            |                                      |                                                              |                                                                   |                     |                                      |                                                                     | 9              | -                                                            | -                                                            |
|                  |            |                                      |                                                              |                                                                   |                     |                                      |                                                                     | 10             | -                                                            | -                                                            |
|                  |            |                                      |                                                              |                                                                   |                     |                                      |                                                                     | 11             | -                                                            | -                                                            |
|                  |            |                                      |                                                              |                                                                   |                     |                                      |                                                                     | 12             | -                                                            | -                                                            |
|                  |            |                                      |                                                              |                                                                   |                     |                                      |                                                                     | 13             | -                                                            | -                                                            |
|                  |            |                                      |                                                              |                                                                   |                     |                                      |                                                                     | 14             | -                                                            | -                                                            |
|                  |            |                                      |                                                              |                                                                   |                     |                                      |                                                                     | 15             | -                                                            | -                                                            |

| No of respondent | Profession            | Knowledge of the AGREE II instrument | Performance of appraisals using the AGREE I or II instrument | Number of appraised guidelines using the AGREE I or II instrument | Experience in years | Involvement in guideline development | Purpose of conducting appraisals using the AGREE I or II instrument | AGREE II Items | Assessment of the influence on <u>methodological quality</u> | Assessment of the influence on <u>recommendation for use</u> |
|------------------|-----------------------|--------------------------------------|--------------------------------------------------------------|-------------------------------------------------------------------|---------------------|--------------------------------------|---------------------------------------------------------------------|----------------|--------------------------------------------------------------|--------------------------------------------------------------|
|                  |                       |                                      |                                                              |                                                                   |                     |                                      |                                                                     | 16             | -                                                            | -                                                            |
|                  |                       |                                      |                                                              |                                                                   |                     |                                      |                                                                     | 17             | -                                                            | -                                                            |
|                  |                       |                                      |                                                              |                                                                   |                     |                                      |                                                                     | 18             | -                                                            | -                                                            |
|                  |                       |                                      |                                                              |                                                                   |                     |                                      |                                                                     | 19             | -                                                            | -                                                            |
|                  |                       |                                      |                                                              |                                                                   |                     |                                      |                                                                     | 20             | -                                                            | -                                                            |
|                  |                       |                                      |                                                              |                                                                   |                     |                                      |                                                                     | 21             | -                                                            | -                                                            |
|                  |                       |                                      |                                                              |                                                                   |                     |                                      |                                                                     | 22             | -                                                            | -                                                            |
|                  |                       |                                      |                                                              |                                                                   |                     |                                      |                                                                     | 23             | -                                                            | -                                                            |
| 4                | methodological expert | yes                                  | yes                                                          | 10-20 guidelines                                                  | 1-5 years           | yes                                  | Assessment of guideline, Writing of guideline synopses              | 1              | 0                                                            | 3                                                            |
|                  |                       |                                      |                                                              |                                                                   |                     |                                      |                                                                     | 2              | 1                                                            | 3                                                            |
|                  |                       |                                      |                                                              |                                                                   |                     |                                      |                                                                     | 3              | 1                                                            | 4                                                            |
|                  |                       |                                      |                                                              |                                                                   |                     |                                      |                                                                     | 4              | 1                                                            | 4                                                            |
|                  |                       |                                      |                                                              |                                                                   |                     |                                      |                                                                     | 5              | 0                                                            | 2                                                            |
|                  |                       |                                      |                                                              |                                                                   |                     |                                      |                                                                     | 6              | 0                                                            | 3                                                            |
|                  |                       |                                      |                                                              |                                                                   |                     |                                      |                                                                     | 7              | 5                                                            | 5                                                            |
|                  |                       |                                      |                                                              |                                                                   |                     |                                      |                                                                     | 8              | 5                                                            | 5                                                            |
|                  |                       |                                      |                                                              |                                                                   |                     |                                      |                                                                     | 9              | 5                                                            | 4                                                            |
|                  |                       |                                      |                                                              |                                                                   |                     |                                      |                                                                     | 10             | 4                                                            | 4                                                            |
|                  |                       |                                      |                                                              |                                                                   |                     |                                      |                                                                     | 11             | 3                                                            | 4                                                            |
|                  |                       |                                      |                                                              |                                                                   |                     |                                      |                                                                     | 12             | 4                                                            | 3                                                            |
|                  |                       |                                      |                                                              |                                                                   |                     |                                      |                                                                     | 13             | 3                                                            | 1                                                            |

| No of respondent | Profession | Knowledge of the AGREE II instrument | Performance of appraisals using the AGREE I or II instrument | Number of appraised guidelines using the AGREE I or II instrument | Experience in years | Involvement in guideline development | Purpose of conducting appraisals using the AGREE I or II instrument | AGREE II Items | Assessment of the influence on <u>methodological quality</u> | Assessment of the influence on <u>recommendation for use</u> |
|------------------|------------|--------------------------------------|--------------------------------------------------------------|-------------------------------------------------------------------|---------------------|--------------------------------------|---------------------------------------------------------------------|----------------|--------------------------------------------------------------|--------------------------------------------------------------|
|                  |            |                                      |                                                              |                                                                   |                     |                                      |                                                                     | 14             | 1                                                            | 0                                                            |
|                  |            |                                      |                                                              |                                                                   |                     |                                      |                                                                     | 15             | 3                                                            | 5                                                            |
|                  |            |                                      |                                                              |                                                                   |                     |                                      |                                                                     | 16             | 1                                                            | 3                                                            |
|                  |            |                                      |                                                              |                                                                   |                     |                                      |                                                                     | 17             | 1                                                            | 4                                                            |
|                  |            |                                      |                                                              |                                                                   |                     |                                      |                                                                     | 18             | 0                                                            | 2                                                            |
|                  |            |                                      |                                                              |                                                                   |                     |                                      |                                                                     | 19             | 0                                                            | 4                                                            |
|                  |            |                                      |                                                              |                                                                   |                     |                                      |                                                                     | 20             | 0                                                            | 3                                                            |
|                  |            |                                      |                                                              |                                                                   |                     |                                      |                                                                     | 21             | 0                                                            | 3                                                            |
|                  |            |                                      |                                                              |                                                                   |                     |                                      |                                                                     | 22             | 3                                                            | 4                                                            |
|                  |            |                                      |                                                              |                                                                   |                     |                                      |                                                                     | 23             | 3                                                            | 4                                                            |
| 5 <sup>a</sup>   | Physician  | yes                                  | yes                                                          | < 10 guidelines                                                   | 1-5 years           | yes                                  | Development of guidelines                                           | 1              | -                                                            | -                                                            |
|                  |            |                                      |                                                              |                                                                   |                     |                                      |                                                                     | 2              | -                                                            | -                                                            |
|                  |            |                                      |                                                              |                                                                   |                     |                                      |                                                                     | 3              | -                                                            | -                                                            |
|                  |            |                                      |                                                              |                                                                   |                     |                                      |                                                                     | 4              | -                                                            | -                                                            |
|                  |            |                                      |                                                              |                                                                   |                     |                                      |                                                                     | 5              | -                                                            | -                                                            |
|                  |            |                                      |                                                              |                                                                   |                     |                                      |                                                                     | 6              | -                                                            | -                                                            |
|                  |            |                                      |                                                              |                                                                   |                     |                                      |                                                                     | 7              | -                                                            | -                                                            |
|                  |            |                                      |                                                              |                                                                   |                     |                                      |                                                                     | 8              | -                                                            | -                                                            |
|                  |            |                                      |                                                              |                                                                   |                     |                                      |                                                                     | 9              | -                                                            | -                                                            |
|                  |            |                                      |                                                              |                                                                   |                     |                                      |                                                                     | 10             | -                                                            | -                                                            |
|                  |            |                                      |                                                              |                                                                   |                     |                                      |                                                                     | 11             | -                                                            | -                                                            |

| No of respondent | Profession | Knowledge of the AGREE II instrument | Performance of appraisals using the AGREE I or II instrument | Number of appraised guidelines using the AGREE I or II instrument | Experience in years | Involvement in guideline development | Purpose of conducting appraisals using the AGREE I or II instrument | AGREE II Items | Assessment of the influence on <u>methodological quality</u> | Assessment of the influence on <u>recommendation for use</u> |
|------------------|------------|--------------------------------------|--------------------------------------------------------------|-------------------------------------------------------------------|---------------------|--------------------------------------|---------------------------------------------------------------------|----------------|--------------------------------------------------------------|--------------------------------------------------------------|
|                  |            |                                      |                                                              |                                                                   |                     |                                      |                                                                     | 12             | -                                                            | -                                                            |
|                  |            |                                      |                                                              |                                                                   |                     |                                      |                                                                     | 13             | -                                                            | -                                                            |
|                  |            |                                      |                                                              |                                                                   |                     |                                      |                                                                     | 14             | -                                                            | -                                                            |
|                  |            |                                      |                                                              |                                                                   |                     |                                      |                                                                     | 15             | -                                                            | -                                                            |
|                  |            |                                      |                                                              |                                                                   |                     |                                      |                                                                     | 16             | -                                                            | -                                                            |
|                  |            |                                      |                                                              |                                                                   |                     |                                      |                                                                     | 17             | -                                                            | -                                                            |
|                  |            |                                      |                                                              |                                                                   |                     |                                      |                                                                     | 18             | -                                                            | -                                                            |
|                  |            |                                      |                                                              |                                                                   |                     |                                      |                                                                     | 19             | -                                                            | -                                                            |
|                  |            |                                      |                                                              |                                                                   |                     |                                      |                                                                     | 20             | -                                                            | -                                                            |
|                  |            |                                      |                                                              |                                                                   |                     |                                      |                                                                     | 21             | -                                                            | -                                                            |
|                  |            |                                      |                                                              |                                                                   |                     |                                      |                                                                     | 22             | -                                                            | -                                                            |
|                  |            |                                      |                                                              |                                                                   |                     |                                      |                                                                     | 23             | -                                                            | -                                                            |
| 6 <sup>a</sup>   | Physician  | yes                                  | yes                                                          | < 10 guidelines                                                   | 1-5 years           | yes                                  | -                                                                   | 1              | -                                                            | -                                                            |
|                  |            |                                      |                                                              |                                                                   |                     |                                      |                                                                     | 2              | -                                                            | -                                                            |
|                  |            |                                      |                                                              |                                                                   |                     |                                      |                                                                     | 3              | -                                                            | -                                                            |
|                  |            |                                      |                                                              |                                                                   |                     |                                      |                                                                     | 4              | -                                                            | -                                                            |
|                  |            |                                      |                                                              |                                                                   |                     |                                      |                                                                     | 5              | -                                                            | -                                                            |
|                  |            |                                      |                                                              |                                                                   |                     |                                      |                                                                     | 6              | -                                                            | -                                                            |
|                  |            |                                      |                                                              |                                                                   |                     |                                      |                                                                     | 7              | -                                                            | -                                                            |
|                  |            |                                      |                                                              |                                                                   |                     |                                      |                                                                     | 8              | -                                                            | -                                                            |
|                  |            |                                      |                                                              |                                                                   |                     |                                      |                                                                     | 9              | -                                                            | -                                                            |

| No of respondent | Profession                        | Knowledge of the AGREE II instrument | Performance of appraisals using the AGREE I or II instrument | Number of appraised guidelines using the AGREE I or II instrument | Experience in years | Involvement in guideline development | Purpose of conducting appraisals using the AGREE I or II instrument | AGREE II Items | Assessment of the influence on <u>methodological quality</u> | Assessment of the influence on <u>recommendation for use</u> |
|------------------|-----------------------------------|--------------------------------------|--------------------------------------------------------------|-------------------------------------------------------------------|---------------------|--------------------------------------|---------------------------------------------------------------------|----------------|--------------------------------------------------------------|--------------------------------------------------------------|
|                  |                                   |                                      |                                                              |                                                                   |                     |                                      |                                                                     | 10             | -                                                            | -                                                            |
|                  |                                   |                                      |                                                              |                                                                   |                     |                                      |                                                                     | 11             | -                                                            | -                                                            |
|                  |                                   |                                      |                                                              |                                                                   |                     |                                      |                                                                     | 12             | -                                                            | -                                                            |
|                  |                                   |                                      |                                                              |                                                                   |                     |                                      |                                                                     | 13             | -                                                            | -                                                            |
|                  |                                   |                                      |                                                              |                                                                   |                     |                                      |                                                                     | 14             | -                                                            | -                                                            |
|                  |                                   |                                      |                                                              |                                                                   |                     |                                      |                                                                     | 15             | -                                                            | -                                                            |
|                  |                                   |                                      |                                                              |                                                                   |                     |                                      |                                                                     | 16             | -                                                            | -                                                            |
|                  |                                   |                                      |                                                              |                                                                   |                     |                                      |                                                                     | 17             | -                                                            | -                                                            |
|                  |                                   |                                      |                                                              |                                                                   |                     |                                      |                                                                     | 18             | -                                                            | -                                                            |
|                  |                                   |                                      |                                                              |                                                                   |                     |                                      |                                                                     | 19             | -                                                            | -                                                            |
|                  |                                   |                                      |                                                              |                                                                   |                     |                                      |                                                                     | 20             | -                                                            | -                                                            |
|                  |                                   |                                      |                                                              |                                                                   |                     |                                      |                                                                     | 21             | -                                                            | -                                                            |
|                  |                                   |                                      |                                                              |                                                                   |                     |                                      |                                                                     | 22             | -                                                            | -                                                            |
|                  |                                   |                                      |                                                              |                                                                   |                     |                                      |                                                                     | 23             | -                                                            | -                                                            |
| 7                | Physician / methodological expert | yes                                  | yes                                                          | < 10 guidelines                                                   | 1-5 years           | yes                                  | Development of guidelines                                           | 1              | 5                                                            | 5                                                            |
|                  |                                   |                                      |                                                              |                                                                   |                     |                                      |                                                                     | 2              | 5                                                            | 5                                                            |
|                  |                                   |                                      |                                                              |                                                                   |                     |                                      |                                                                     | 3              | 5                                                            | 5                                                            |
|                  |                                   |                                      |                                                              |                                                                   |                     |                                      |                                                                     | 4              | 1                                                            | 1                                                            |
|                  |                                   |                                      |                                                              |                                                                   |                     |                                      |                                                                     | 5              | 4                                                            | 4                                                            |
|                  |                                   |                                      |                                                              |                                                                   |                     |                                      |                                                                     | 6              | 4                                                            | 4                                                            |
|                  |                                   |                                      |                                                              |                                                                   |                     |                                      |                                                                     | 7              | 5                                                            | 5                                                            |

| No of respondent | Profession | Knowledge of the AGREE II instrument | Performance of appraisals using the AGREE I or II instrument | Number of appraised guidelines using the AGREE I or II instrument | Experience in years | Involvement in guideline development | Purpose of conducting appraisals using the AGREE I or II instrument | AGREE II Items | Assessment of the influence on <u>methodological quality</u> | Assessment of the influence on <u>recommendation for use</u> |
|------------------|------------|--------------------------------------|--------------------------------------------------------------|-------------------------------------------------------------------|---------------------|--------------------------------------|---------------------------------------------------------------------|----------------|--------------------------------------------------------------|--------------------------------------------------------------|
|                  |            |                                      |                                                              |                                                                   |                     |                                      |                                                                     | 8              | 5                                                            | 5                                                            |
|                  |            |                                      |                                                              |                                                                   |                     |                                      |                                                                     | 9              | 5                                                            | 5                                                            |
|                  |            |                                      |                                                              |                                                                   |                     |                                      |                                                                     | 10             | 5                                                            | 5                                                            |
|                  |            |                                      |                                                              |                                                                   |                     |                                      |                                                                     | 11             | 4                                                            | 5                                                            |
|                  |            |                                      |                                                              |                                                                   |                     |                                      |                                                                     | 12             | 4                                                            | 4                                                            |
|                  |            |                                      |                                                              |                                                                   |                     |                                      |                                                                     | 13             | 3                                                            | 3                                                            |
|                  |            |                                      |                                                              |                                                                   |                     |                                      |                                                                     | 14             | 2                                                            | 1                                                            |
|                  |            |                                      |                                                              |                                                                   |                     |                                      |                                                                     | 15             | 1                                                            | 5                                                            |
|                  |            |                                      |                                                              |                                                                   |                     |                                      |                                                                     | 16             | 1                                                            | 5                                                            |
|                  |            |                                      |                                                              |                                                                   |                     |                                      |                                                                     | 17             | 1                                                            | 5                                                            |
|                  |            |                                      |                                                              |                                                                   |                     |                                      |                                                                     | 18             | 1                                                            | 1                                                            |
|                  |            |                                      |                                                              |                                                                   |                     |                                      |                                                                     | 19             | 1                                                            | 1                                                            |
|                  |            |                                      |                                                              |                                                                   |                     |                                      |                                                                     | 20             | 0                                                            | 0                                                            |
|                  |            |                                      |                                                              |                                                                   |                     |                                      |                                                                     | 21             | 0                                                            | 0                                                            |
| 22               | 4          | 5                                    |                                                              |                                                                   |                     |                                      |                                                                     |                |                                                              |                                                              |
| 23               | 4          | 5                                    |                                                              |                                                                   |                     |                                      |                                                                     |                |                                                              |                                                              |
| 8 <sup>b</sup>   | other      | no                                   | no                                                           | -                                                                 | -                   | no                                   | -                                                                   | 1              | -                                                            | -                                                            |
|                  |            |                                      |                                                              |                                                                   |                     |                                      |                                                                     | 2              | -                                                            | -                                                            |
|                  |            |                                      |                                                              |                                                                   |                     |                                      |                                                                     | 3              | -                                                            | -                                                            |
|                  |            |                                      |                                                              |                                                                   |                     |                                      |                                                                     | 4              | -                                                            | -                                                            |
|                  |            |                                      |                                                              |                                                                   |                     |                                      |                                                                     | 5              | -                                                            | -                                                            |



| No of respondent | Profession | Knowledge of the AGREE II instrument | Performance of appraisals using the AGREE I or II instrument | Number of appraised guidelines using the AGREE I or II instrument | Experience in years | Involvement in guideline development | Purpose of conducting appraisals using the AGREE I or II instrument | AGREE II Items | Assessment of the influence on <u>methodological quality</u> | Assessment of the influence on <u>recommendation for use</u> |
|------------------|------------|--------------------------------------|--------------------------------------------------------------|-------------------------------------------------------------------|---------------------|--------------------------------------|---------------------------------------------------------------------|----------------|--------------------------------------------------------------|--------------------------------------------------------------|
|                  |            |                                      |                                                              |                                                                   |                     |                                      |                                                                     | 6              | -                                                            | -                                                            |
|                  |            |                                      |                                                              |                                                                   |                     |                                      |                                                                     | 7              | -                                                            | -                                                            |
|                  |            |                                      |                                                              |                                                                   |                     |                                      |                                                                     | 8              | -                                                            | -                                                            |
|                  |            |                                      |                                                              |                                                                   |                     |                                      |                                                                     | 9              | -                                                            | -                                                            |
|                  |            |                                      |                                                              |                                                                   |                     |                                      |                                                                     | 10             | -                                                            | -                                                            |
|                  |            |                                      |                                                              |                                                                   |                     |                                      |                                                                     | 11             | -                                                            | -                                                            |
|                  |            |                                      |                                                              |                                                                   |                     |                                      |                                                                     | 12             | -                                                            | -                                                            |
|                  |            |                                      |                                                              |                                                                   |                     |                                      |                                                                     | 13             | -                                                            | -                                                            |
|                  |            |                                      |                                                              |                                                                   |                     |                                      |                                                                     | 14             | -                                                            | -                                                            |
|                  |            |                                      |                                                              |                                                                   |                     |                                      |                                                                     | 15             | -                                                            | -                                                            |
|                  |            |                                      |                                                              |                                                                   |                     |                                      |                                                                     | 16             | -                                                            | -                                                            |
|                  |            |                                      |                                                              |                                                                   |                     |                                      |                                                                     | 17             | -                                                            | -                                                            |
|                  |            |                                      |                                                              |                                                                   |                     |                                      |                                                                     | 18             | -                                                            | -                                                            |
|                  |            |                                      |                                                              |                                                                   |                     |                                      |                                                                     | 19             | -                                                            | -                                                            |
| 20               | -          | -                                    |                                                              |                                                                   |                     |                                      |                                                                     |                |                                                              |                                                              |
| 21               | -          | -                                    |                                                              |                                                                   |                     |                                      |                                                                     |                |                                                              |                                                              |
| 22               | -          | -                                    |                                                              |                                                                   |                     |                                      |                                                                     |                |                                                              |                                                              |
| 23               | -          | -                                    |                                                              |                                                                   |                     |                                      |                                                                     |                |                                                              |                                                              |
| 9                | other      | yes                                  | yes                                                          | > 20 guidelines                                                   | 1-5 years           | no                                   | Project work                                                        | 1              | 2                                                            | 3                                                            |
|                  |            |                                      |                                                              |                                                                   |                     |                                      |                                                                     | 2              | 3                                                            | 3                                                            |
|                  |            |                                      |                                                              |                                                                   |                     |                                      |                                                                     | 3              | 2                                                            | 2                                                            |

| No of respondent | Profession     | Knowledge of the AGREE II instrument | Performance of appraisals using the AGREE I or II instrument | Number of appraised guidelines using the AGREE I or II instrument | Experience in years | Involvement in guideline development | Purpose of conducting appraisals using the AGREE I or II instrument | AGREE II Items | Assessment of the influence on <u>methodological quality</u> | Assessment of the influence on <u>recommendation for use</u> |
|------------------|----------------|--------------------------------------|--------------------------------------------------------------|-------------------------------------------------------------------|---------------------|--------------------------------------|---------------------------------------------------------------------|----------------|--------------------------------------------------------------|--------------------------------------------------------------|
|                  |                |                                      |                                                              |                                                                   |                     |                                      |                                                                     | 4              | 4                                                            | 3                                                            |
|                  |                |                                      |                                                              |                                                                   |                     |                                      |                                                                     | 5              | 4                                                            | 3                                                            |
|                  |                |                                      |                                                              |                                                                   |                     |                                      |                                                                     | 6              | 3                                                            | 3                                                            |
|                  |                |                                      |                                                              |                                                                   |                     |                                      |                                                                     | 7              | 4                                                            | 4                                                            |
|                  |                |                                      |                                                              |                                                                   |                     |                                      |                                                                     | 8              | 4                                                            | 3                                                            |
|                  |                |                                      |                                                              |                                                                   |                     |                                      |                                                                     | 9              | 4                                                            | 3                                                            |
|                  |                |                                      |                                                              |                                                                   |                     |                                      |                                                                     | 10             | 4                                                            | 4                                                            |
|                  |                |                                      |                                                              |                                                                   |                     |                                      |                                                                     | 11             | 4                                                            | 4                                                            |
|                  |                |                                      |                                                              |                                                                   |                     |                                      |                                                                     | 12             | 4                                                            | 4                                                            |
|                  |                |                                      |                                                              |                                                                   |                     |                                      |                                                                     | 13             | 3                                                            | 3                                                            |
|                  |                |                                      |                                                              |                                                                   |                     |                                      |                                                                     | 14             | 4                                                            | 3                                                            |
|                  |                |                                      |                                                              |                                                                   |                     |                                      |                                                                     | 15             | 3                                                            | 5                                                            |
|                  |                |                                      |                                                              |                                                                   |                     |                                      |                                                                     | 16             | 3                                                            | 5                                                            |
|                  |                |                                      |                                                              |                                                                   |                     |                                      |                                                                     | 17             | 3                                                            | 5                                                            |
| 18               | 3              | 2                                    |                                                              |                                                                   |                     |                                      |                                                                     |                |                                                              |                                                              |
| 19               | 3              | 2                                    |                                                              |                                                                   |                     |                                      |                                                                     |                |                                                              |                                                              |
| 20               | 2              | 2                                    |                                                              |                                                                   |                     |                                      |                                                                     |                |                                                              |                                                              |
| 21               | 4              | 3                                    |                                                              |                                                                   |                     |                                      |                                                                     |                |                                                              |                                                              |
| 22               | 4              | 4                                    |                                                              |                                                                   |                     |                                      |                                                                     |                |                                                              |                                                              |
| 23               | 5              | 4                                    |                                                              |                                                                   |                     |                                      |                                                                     |                |                                                              |                                                              |
| 10               | methodological | yes                                  | yes                                                          | < 10                                                              | 1-5 years           | yes                                  | -                                                                   | 1              | 1                                                            | 1                                                            |

| No of respondent | Profession | Knowledge of the AGREE II instrument | Performance of appraisals using the AGREE I or II instrument | Number of appraised guidelines using the AGREE I or II instrument | Experience in years | Involvement in guideline development | Purpose of conducting appraisals using the AGREE I or II instrument | AGREE II Items | Assessment of the influence on <u>methodological quality</u> | Assessment of the influence on <u>recommendation for use</u> |
|------------------|------------|--------------------------------------|--------------------------------------------------------------|-------------------------------------------------------------------|---------------------|--------------------------------------|---------------------------------------------------------------------|----------------|--------------------------------------------------------------|--------------------------------------------------------------|
|                  | expert     |                                      |                                                              | guidelines                                                        |                     |                                      |                                                                     | 2              | 2                                                            | 2                                                            |
|                  |            |                                      |                                                              |                                                                   |                     |                                      |                                                                     | 3              | 1                                                            | 2                                                            |
|                  |            |                                      |                                                              |                                                                   |                     |                                      |                                                                     | 4              | 2                                                            | 2                                                            |
|                  |            |                                      |                                                              |                                                                   |                     |                                      |                                                                     | 5              | 2                                                            | 2                                                            |
|                  |            |                                      |                                                              |                                                                   |                     |                                      |                                                                     | 6              | 0                                                            | 0                                                            |
|                  |            |                                      |                                                              |                                                                   |                     |                                      |                                                                     | 7              | 5                                                            | 5                                                            |
|                  |            |                                      |                                                              |                                                                   |                     |                                      |                                                                     | 8              | 4                                                            | 4                                                            |
|                  |            |                                      |                                                              |                                                                   |                     |                                      |                                                                     | 9              | 4                                                            | 4                                                            |
|                  |            |                                      |                                                              |                                                                   |                     |                                      |                                                                     | 10             | 3                                                            | 3                                                            |
|                  |            |                                      |                                                              |                                                                   |                     |                                      |                                                                     | 11             | 5                                                            | 5                                                            |
|                  |            |                                      |                                                              |                                                                   |                     |                                      |                                                                     | 12             | 5                                                            | 5                                                            |
|                  |            |                                      |                                                              |                                                                   |                     |                                      |                                                                     | 13             | 3                                                            | 3                                                            |
|                  |            |                                      |                                                              |                                                                   |                     |                                      |                                                                     | 14             | 0                                                            | 0                                                            |
|                  |            |                                      |                                                              |                                                                   |                     |                                      |                                                                     | 15             | 1                                                            | 1                                                            |
|                  |            |                                      |                                                              |                                                                   |                     |                                      |                                                                     | 16             | 2                                                            | 2                                                            |
|                  |            |                                      |                                                              |                                                                   |                     |                                      |                                                                     | 17             | 1                                                            | 1                                                            |
|                  |            |                                      |                                                              |                                                                   |                     |                                      |                                                                     | 18             | 1                                                            | 1                                                            |
|                  |            |                                      |                                                              |                                                                   |                     |                                      |                                                                     | 19             | 2                                                            | 2                                                            |
|                  |            |                                      |                                                              |                                                                   |                     |                                      |                                                                     | 20             | 1                                                            | 1                                                            |
|                  |            |                                      |                                                              |                                                                   |                     |                                      |                                                                     | 21             | 2                                                            | 2                                                            |
|                  |            |                                      |                                                              |                                                                   |                     |                                      |                                                                     | 22             | 2                                                            | 2                                                            |

| No of respondent | Profession | Knowledge of the AGREE II instrument | Performance of appraisals using the AGREE I or II instrument | Number of appraised guidelines using the AGREE I or II instrument | Experience in years | Involvement in guideline development | Purpose of conducting appraisals using the AGREE I or II instrument | AGREE II Items | Assessment of the influence on <u>methodological quality</u> | Assessment of the influence on <u>recommendation for use</u> |
|------------------|------------|--------------------------------------|--------------------------------------------------------------|-------------------------------------------------------------------|---------------------|--------------------------------------|---------------------------------------------------------------------|----------------|--------------------------------------------------------------|--------------------------------------------------------------|
|                  |            |                                      |                                                              |                                                                   |                     |                                      |                                                                     | 23             | 5                                                            | 5                                                            |
| 11 <sup>b</sup>  | other      | no                                   | no                                                           | -                                                                 | -                   | no                                   | -                                                                   | 1              | -                                                            | -                                                            |
|                  |            |                                      |                                                              |                                                                   |                     |                                      |                                                                     | 2              | -                                                            | -                                                            |
|                  |            |                                      |                                                              |                                                                   |                     |                                      |                                                                     | 3              | -                                                            | -                                                            |
|                  |            |                                      |                                                              |                                                                   |                     |                                      |                                                                     | 4              | -                                                            | -                                                            |
|                  |            |                                      |                                                              |                                                                   |                     |                                      |                                                                     | 5              | -                                                            | -                                                            |
|                  |            |                                      |                                                              |                                                                   |                     |                                      |                                                                     | 6              | -                                                            | -                                                            |
|                  |            |                                      |                                                              |                                                                   |                     |                                      |                                                                     | 7              | -                                                            | -                                                            |
|                  |            |                                      |                                                              |                                                                   |                     |                                      |                                                                     | 8              | -                                                            | -                                                            |
|                  |            |                                      |                                                              |                                                                   |                     |                                      |                                                                     | 9              | -                                                            | -                                                            |
|                  |            |                                      |                                                              |                                                                   |                     |                                      |                                                                     | 10             | -                                                            | -                                                            |
|                  |            |                                      |                                                              |                                                                   |                     |                                      |                                                                     | 11             | -                                                            | -                                                            |
|                  |            |                                      |                                                              |                                                                   |                     |                                      |                                                                     | 12             | -                                                            | -                                                            |
|                  |            |                                      |                                                              |                                                                   |                     |                                      |                                                                     | 13             | -                                                            | -                                                            |
| 14               | -          | -                                    |                                                              |                                                                   |                     |                                      |                                                                     |                |                                                              |                                                              |
| 15               | -          | -                                    |                                                              |                                                                   |                     |                                      |                                                                     |                |                                                              |                                                              |
| 16               | -          | -                                    |                                                              |                                                                   |                     |                                      |                                                                     |                |                                                              |                                                              |
| 17               | -          | -                                    |                                                              |                                                                   |                     |                                      |                                                                     |                |                                                              |                                                              |
| 18               | -          | -                                    |                                                              |                                                                   |                     |                                      |                                                                     |                |                                                              |                                                              |
| 19               | -          | -                                    |                                                              |                                                                   |                     |                                      |                                                                     |                |                                                              |                                                              |
| 20               | -          | -                                    |                                                              |                                                                   |                     |                                      |                                                                     |                |                                                              |                                                              |

| No of respondent | Profession                        | Knowledge of the AGREE II instrument | Performance of appraisals using the AGREE I or II instrument | Number of appraised guidelines using the AGREE I or II instrument | Experience in years | Involvement in guideline development | Purpose of conducting appraisals using the AGREE I or II instrument | AGREE II Items | Assessment of the influence on <u>methodological quality</u> | Assessment of the influence on <u>recommendation for use</u> |
|------------------|-----------------------------------|--------------------------------------|--------------------------------------------------------------|-------------------------------------------------------------------|---------------------|--------------------------------------|---------------------------------------------------------------------|----------------|--------------------------------------------------------------|--------------------------------------------------------------|
|                  |                                   |                                      |                                                              |                                                                   |                     |                                      |                                                                     | 21             | -                                                            | -                                                            |
|                  |                                   |                                      |                                                              |                                                                   |                     |                                      |                                                                     | 22             | -                                                            | -                                                            |
|                  |                                   |                                      |                                                              |                                                                   |                     |                                      |                                                                     | 23             | -                                                            | -                                                            |
| 12               | Physician / methodological expert | yes                                  | yes                                                          | < 10 guidelines                                                   | 1-5 years           | yes                                  | -                                                                   | 1              | 1                                                            | 1                                                            |
|                  |                                   |                                      |                                                              |                                                                   |                     |                                      |                                                                     | 2              | 2                                                            | 2                                                            |
|                  |                                   |                                      |                                                              |                                                                   |                     |                                      |                                                                     | 3              | 3                                                            | 4                                                            |
|                  |                                   |                                      |                                                              |                                                                   |                     |                                      |                                                                     | 4              | 3                                                            | 2                                                            |
|                  |                                   |                                      |                                                              |                                                                   |                     |                                      |                                                                     | 5              | 4                                                            | 5                                                            |
|                  |                                   |                                      |                                                              |                                                                   |                     |                                      |                                                                     | 6              | 1                                                            | 1                                                            |
|                  |                                   |                                      |                                                              |                                                                   |                     |                                      |                                                                     | 7              | 5                                                            | 5                                                            |
|                  |                                   |                                      |                                                              |                                                                   |                     |                                      |                                                                     | 8              | 5                                                            | 5                                                            |
|                  |                                   |                                      |                                                              |                                                                   |                     |                                      |                                                                     | 9              | 3                                                            | 3                                                            |
|                  |                                   |                                      |                                                              |                                                                   |                     |                                      |                                                                     | 10             | 5                                                            | 5                                                            |
|                  |                                   |                                      |                                                              |                                                                   |                     |                                      |                                                                     | 11             | 5                                                            | 5                                                            |
|                  |                                   |                                      |                                                              |                                                                   |                     |                                      |                                                                     | 12             | 5                                                            | 5                                                            |
|                  |                                   |                                      |                                                              |                                                                   |                     |                                      |                                                                     | 13             | 4                                                            | 2                                                            |
|                  |                                   |                                      |                                                              |                                                                   |                     |                                      |                                                                     | 14             | 3                                                            | 2                                                            |
|                  |                                   |                                      |                                                              |                                                                   |                     |                                      |                                                                     | 15             | 5                                                            | 5                                                            |
|                  |                                   |                                      |                                                              |                                                                   |                     |                                      |                                                                     | 16             | 5                                                            | 5                                                            |
|                  |                                   |                                      |                                                              |                                                                   |                     |                                      |                                                                     | 17             | 2                                                            | 3                                                            |
|                  |                                   |                                      |                                                              |                                                                   |                     |                                      |                                                                     | 18             | 1                                                            | 2                                                            |

| No of respondent | Profession | Knowledge of the AGREE II instrument | Performance of appraisals using the AGREE I or II instrument | Number of appraised guidelines using the AGREE I or II instrument | Experience in years | Involvement in guideline development | Purpose of conducting appraisals using the AGREE I or II instrument | AGREE II Items | Assessment of the influence on <u>methodological quality</u> | Assessment of the influence on <u>recommendation for use</u> |
|------------------|------------|--------------------------------------|--------------------------------------------------------------|-------------------------------------------------------------------|---------------------|--------------------------------------|---------------------------------------------------------------------|----------------|--------------------------------------------------------------|--------------------------------------------------------------|
|                  |            |                                      |                                                              |                                                                   |                     |                                      |                                                                     | 19             | 1                                                            | 2                                                            |
|                  |            |                                      |                                                              |                                                                   |                     |                                      |                                                                     | 20             | 3                                                            | 4                                                            |
|                  |            |                                      |                                                              |                                                                   |                     |                                      |                                                                     | 21             | 1                                                            | 1                                                            |
|                  |            |                                      |                                                              |                                                                   |                     |                                      |                                                                     | 22             | 5                                                            | 5                                                            |
|                  |            |                                      |                                                              |                                                                   |                     |                                      |                                                                     | 23             | 5                                                            | 5                                                            |
| 13 <sup>b</sup>  | other      | no                                   | no                                                           | -                                                                 | -                   | yes                                  | -                                                                   | 1              | -                                                            | -                                                            |
|                  |            |                                      |                                                              |                                                                   |                     |                                      |                                                                     | 2              | -                                                            | -                                                            |
|                  |            |                                      |                                                              |                                                                   |                     |                                      |                                                                     | 3              | -                                                            | -                                                            |
|                  |            |                                      |                                                              |                                                                   |                     |                                      |                                                                     | 4              | -                                                            | -                                                            |
|                  |            |                                      |                                                              |                                                                   |                     |                                      |                                                                     | 5              | -                                                            | -                                                            |
|                  |            |                                      |                                                              |                                                                   |                     |                                      |                                                                     | 6              | -                                                            | -                                                            |
|                  |            |                                      |                                                              |                                                                   |                     |                                      |                                                                     | 7              | -                                                            | -                                                            |
|                  |            |                                      |                                                              |                                                                   |                     |                                      |                                                                     | 8              | -                                                            | -                                                            |
|                  |            |                                      |                                                              |                                                                   |                     |                                      |                                                                     | 9              | -                                                            | -                                                            |
|                  |            |                                      |                                                              |                                                                   |                     |                                      |                                                                     | 10             | -                                                            | -                                                            |
|                  |            |                                      |                                                              |                                                                   |                     |                                      |                                                                     | 11             | -                                                            | -                                                            |
|                  |            |                                      |                                                              |                                                                   |                     |                                      |                                                                     | 12             | -                                                            | -                                                            |
|                  |            |                                      |                                                              |                                                                   |                     |                                      |                                                                     | 13             | -                                                            | -                                                            |
|                  |            |                                      |                                                              |                                                                   |                     |                                      |                                                                     | 14             | -                                                            | -                                                            |
|                  |            |                                      |                                                              |                                                                   |                     |                                      |                                                                     | 15             | -                                                            | -                                                            |
|                  |            |                                      |                                                              |                                                                   |                     |                                      |                                                                     | 16             | -                                                            | -                                                            |

| No of respondent | Profession | Knowledge of the AGREE II instrument | Performance of appraisals using the AGREE I or II instrument | Number of appraised guidelines using the AGREE I or II instrument | Experience in years | Involvement in guideline development | Purpose of conducting appraisals using the AGREE I or II instrument | AGREE II Items | Assessment of the influence on <u>methodological quality</u> | Assessment of the influence on <u>recommendation for use</u> |
|------------------|------------|--------------------------------------|--------------------------------------------------------------|-------------------------------------------------------------------|---------------------|--------------------------------------|---------------------------------------------------------------------|----------------|--------------------------------------------------------------|--------------------------------------------------------------|
|                  |            |                                      |                                                              |                                                                   |                     |                                      |                                                                     | 17             | -                                                            | -                                                            |
|                  |            |                                      |                                                              |                                                                   |                     |                                      |                                                                     | 18             | -                                                            | -                                                            |
|                  |            |                                      |                                                              |                                                                   |                     |                                      |                                                                     | 19             | -                                                            | -                                                            |
|                  |            |                                      |                                                              |                                                                   |                     |                                      |                                                                     | 20             | -                                                            | -                                                            |
|                  |            |                                      |                                                              |                                                                   |                     |                                      |                                                                     | 21             | -                                                            | -                                                            |
|                  |            |                                      |                                                              |                                                                   |                     |                                      |                                                                     | 22             | -                                                            | -                                                            |
|                  |            |                                      |                                                              |                                                                   |                     |                                      |                                                                     | 23             | -                                                            | -                                                            |
| 14 <sup>b</sup>  | Physician  | no                                   | no                                                           | -                                                                 | -                   | no                                   | -                                                                   | 1              | -                                                            | -                                                            |
|                  |            |                                      |                                                              |                                                                   |                     |                                      |                                                                     | 2              | -                                                            | -                                                            |
|                  |            |                                      |                                                              |                                                                   |                     |                                      |                                                                     | 3              | -                                                            | -                                                            |
|                  |            |                                      |                                                              |                                                                   |                     |                                      |                                                                     | 4              | -                                                            | -                                                            |
|                  |            |                                      |                                                              |                                                                   |                     |                                      |                                                                     | 5              | -                                                            | -                                                            |
|                  |            |                                      |                                                              |                                                                   |                     |                                      |                                                                     | 6              | -                                                            | -                                                            |
|                  |            |                                      |                                                              |                                                                   |                     |                                      |                                                                     | 7              | -                                                            | -                                                            |
|                  |            |                                      |                                                              |                                                                   |                     |                                      |                                                                     | 8              | -                                                            | -                                                            |
|                  |            |                                      |                                                              |                                                                   |                     |                                      |                                                                     | 9              | -                                                            | -                                                            |
|                  |            |                                      |                                                              |                                                                   |                     |                                      |                                                                     | 10             | -                                                            | -                                                            |
|                  |            |                                      |                                                              |                                                                   |                     |                                      |                                                                     | 11             | -                                                            | -                                                            |
|                  |            |                                      |                                                              |                                                                   |                     |                                      |                                                                     | 12             | -                                                            | -                                                            |
|                  |            |                                      |                                                              |                                                                   |                     |                                      |                                                                     | 13             | -                                                            | -                                                            |
|                  |            |                                      |                                                              |                                                                   |                     |                                      |                                                                     | 14             | -                                                            | -                                                            |

| No of respondent | Profession                        | Knowledge of the AGREE II instrument | Performance of appraisals using the AGREE I or II instrument | Number of appraised guidelines using the AGREE I or II instrument | Experience in years | Involvement in guideline development | Purpose of conducting appraisals using the AGREE I or II instrument | AGREE II Items | Assessment of the influence on <u>methodological quality</u> | Assessment of the influence on <u>recommendation for use</u> |
|------------------|-----------------------------------|--------------------------------------|--------------------------------------------------------------|-------------------------------------------------------------------|---------------------|--------------------------------------|---------------------------------------------------------------------|----------------|--------------------------------------------------------------|--------------------------------------------------------------|
|                  |                                   |                                      |                                                              |                                                                   |                     |                                      |                                                                     | 15             | -                                                            | -                                                            |
|                  |                                   |                                      |                                                              |                                                                   |                     |                                      |                                                                     | 16             | -                                                            | -                                                            |
|                  |                                   |                                      |                                                              |                                                                   |                     |                                      |                                                                     | 17             | -                                                            | -                                                            |
|                  |                                   |                                      |                                                              |                                                                   |                     |                                      |                                                                     | 18             | -                                                            | -                                                            |
|                  |                                   |                                      |                                                              |                                                                   |                     |                                      |                                                                     | 19             | -                                                            | -                                                            |
|                  |                                   |                                      |                                                              |                                                                   |                     |                                      |                                                                     | 20             | -                                                            | -                                                            |
|                  |                                   |                                      |                                                              |                                                                   |                     |                                      |                                                                     | 21             | -                                                            | -                                                            |
|                  |                                   |                                      |                                                              |                                                                   |                     |                                      |                                                                     | 22             | -                                                            | -                                                            |
|                  |                                   |                                      |                                                              |                                                                   |                     |                                      |                                                                     | 23             | -                                                            | -                                                            |
| 15               | Physician / methodological expert | yes                                  | yes                                                          | > 20 guidelines                                                   | 1-5 years           | yes                                  | Assessment of guideline quality, Development of guidelines          | 1              | 1                                                            | 1                                                            |
|                  |                                   |                                      |                                                              |                                                                   |                     |                                      |                                                                     | 2              | 1                                                            | 2                                                            |
|                  |                                   |                                      |                                                              |                                                                   |                     |                                      |                                                                     | 3              | 2                                                            | 2                                                            |
|                  |                                   |                                      |                                                              |                                                                   |                     |                                      |                                                                     | 4              | 3                                                            | 3                                                            |
|                  |                                   |                                      |                                                              |                                                                   |                     |                                      |                                                                     | 5              | 3                                                            | 2                                                            |
|                  |                                   |                                      |                                                              |                                                                   |                     |                                      |                                                                     | 6              | 0                                                            | 0                                                            |
|                  |                                   |                                      |                                                              |                                                                   |                     |                                      |                                                                     | 7              | 5                                                            | 4                                                            |
|                  |                                   |                                      |                                                              |                                                                   |                     |                                      |                                                                     | 8              | 5                                                            | 4                                                            |
|                  |                                   |                                      |                                                              |                                                                   |                     |                                      |                                                                     | 9              | 5                                                            | 4                                                            |
|                  |                                   |                                      |                                                              |                                                                   |                     |                                      |                                                                     | 10             | 4                                                            | 3                                                            |
|                  |                                   |                                      |                                                              |                                                                   |                     |                                      |                                                                     | 11             | 5                                                            | 5                                                            |
|                  |                                   |                                      |                                                              |                                                                   |                     |                                      |                                                                     | 12             | 5                                                            | 3                                                            |



| No of respondent | Profession | Knowledge of the AGREE II instrument | Performance of appraisals using the AGREE I or II instrument | Number of appraised guidelines using the AGREE I or II instrument | Experience in years | Involvement in guideline development | Purpose of conducting appraisals using the AGREE I or II instrument | AGREE II Items | Assessment of the influence on <u>methodological quality</u> | Assessment of the influence on <u>recommendation for use</u> |
|------------------|------------|--------------------------------------|--------------------------------------------------------------|-------------------------------------------------------------------|---------------------|--------------------------------------|---------------------------------------------------------------------|----------------|--------------------------------------------------------------|--------------------------------------------------------------|
|                  |            |                                      |                                                              |                                                                   |                     |                                      |                                                                     | 13             | 4                                                            | 3                                                            |
|                  |            |                                      |                                                              |                                                                   |                     |                                      |                                                                     | 14             | 1                                                            | 0                                                            |
|                  |            |                                      |                                                              |                                                                   |                     |                                      |                                                                     | 15             | 3                                                            | 4                                                            |
|                  |            |                                      |                                                              |                                                                   |                     |                                      |                                                                     | 16             | 3                                                            | 4                                                            |
|                  |            |                                      |                                                              |                                                                   |                     |                                      |                                                                     | 17             | 4                                                            | 5                                                            |
|                  |            |                                      |                                                              |                                                                   |                     |                                      |                                                                     | 18             | 2                                                            | 1                                                            |
|                  |            |                                      |                                                              |                                                                   |                     |                                      |                                                                     | 19             | 3                                                            | 4                                                            |
|                  |            |                                      |                                                              |                                                                   |                     |                                      |                                                                     | 20             | 4                                                            | 2                                                            |
|                  |            |                                      |                                                              |                                                                   |                     |                                      |                                                                     | 21             | 3                                                            | 4                                                            |
|                  |            |                                      |                                                              |                                                                   |                     |                                      |                                                                     | 22             | 4                                                            | 4                                                            |
|                  |            |                                      |                                                              |                                                                   |                     |                                      |                                                                     | 23             | 4                                                            | 3                                                            |
| 16               | Physician  | yes                                  | yes                                                          | < 10 guidelines                                                   | 1-5 years           | no                                   | Further training                                                    | 1              | 1                                                            | 4                                                            |
|                  |            |                                      |                                                              |                                                                   |                     |                                      |                                                                     | 2              | 2                                                            | 4                                                            |
|                  |            |                                      |                                                              |                                                                   |                     |                                      |                                                                     | 3              | 1                                                            | 4                                                            |
|                  |            |                                      |                                                              |                                                                   |                     |                                      |                                                                     | 4              | 2                                                            | 3                                                            |
|                  |            |                                      |                                                              |                                                                   |                     |                                      |                                                                     | 5              | 3                                                            | 4                                                            |
|                  |            |                                      |                                                              |                                                                   |                     |                                      |                                                                     | 6              | 2                                                            | 4                                                            |
|                  |            |                                      |                                                              |                                                                   |                     |                                      |                                                                     | 7              | 5                                                            | 4                                                            |
|                  |            |                                      |                                                              |                                                                   |                     |                                      |                                                                     | 8              | 5                                                            | 4                                                            |
|                  |            |                                      |                                                              |                                                                   |                     |                                      |                                                                     | 9              | 5                                                            | 4                                                            |
|                  |            |                                      |                                                              |                                                                   |                     |                                      |                                                                     | 10             | 5                                                            | 4                                                            |

| No of respondent | Profession            | Knowledge of the AGREE II instrument | Performance of appraisals using the AGREE I or II instrument | Number of appraised guidelines using the AGREE I or II instrument | Experience in years | Involvement in guideline development | Purpose of conducting appraisals using the AGREE I or II instrument | AGREE II Items | Assessment of the influence on <u>methodological quality</u> | Assessment of the influence on <u>recommendation for use</u> |
|------------------|-----------------------|--------------------------------------|--------------------------------------------------------------|-------------------------------------------------------------------|---------------------|--------------------------------------|---------------------------------------------------------------------|----------------|--------------------------------------------------------------|--------------------------------------------------------------|
|                  |                       |                                      |                                                              |                                                                   |                     |                                      |                                                                     | 11             | 5                                                            | 4                                                            |
|                  |                       |                                      |                                                              |                                                                   |                     |                                      |                                                                     | 12             | 5                                                            | 4                                                            |
|                  |                       |                                      |                                                              |                                                                   |                     |                                      |                                                                     | 13             | 4                                                            | 4                                                            |
|                  |                       |                                      |                                                              |                                                                   |                     |                                      |                                                                     | 14             | 4                                                            | 1                                                            |
|                  |                       |                                      |                                                              |                                                                   |                     |                                      |                                                                     | 15             | 2                                                            | 3                                                            |
|                  |                       |                                      |                                                              |                                                                   |                     |                                      |                                                                     | 16             | 4                                                            | 3                                                            |
|                  |                       |                                      |                                                              |                                                                   |                     |                                      |                                                                     | 17             | 1                                                            | 4                                                            |
|                  |                       |                                      |                                                              |                                                                   |                     |                                      |                                                                     | 18             | 3                                                            | 3                                                            |
|                  |                       |                                      |                                                              |                                                                   |                     |                                      |                                                                     | 19             | 2                                                            | 3                                                            |
|                  |                       |                                      |                                                              |                                                                   |                     |                                      |                                                                     | 20             | 2                                                            | 3                                                            |
|                  |                       |                                      |                                                              |                                                                   |                     |                                      |                                                                     | 21             | 4                                                            | 2                                                            |
|                  |                       |                                      |                                                              |                                                                   |                     |                                      |                                                                     | 22             | 4                                                            | 4                                                            |
|                  |                       |                                      |                                                              |                                                                   |                     |                                      |                                                                     | 23             | 5                                                            | 3                                                            |
| 17               | methodological expert | yes                                  | yes                                                          | > 20 guidelines                                                   | > 5 years           | no                                   | Assessment of guideline quality                                     | 1              | 1                                                            | 3                                                            |
|                  |                       |                                      |                                                              |                                                                   |                     |                                      |                                                                     | 2              | 2                                                            | 3                                                            |
|                  |                       |                                      |                                                              |                                                                   |                     |                                      |                                                                     | 3              | 2                                                            | 4                                                            |
|                  |                       |                                      |                                                              |                                                                   |                     |                                      |                                                                     | 4              | 3                                                            | 3                                                            |
|                  |                       |                                      |                                                              |                                                                   |                     |                                      |                                                                     | 5              | 3                                                            | 4                                                            |
|                  |                       |                                      |                                                              |                                                                   |                     |                                      |                                                                     | 6              | 3                                                            | 4                                                            |
|                  |                       |                                      |                                                              |                                                                   |                     |                                      |                                                                     | 7              | 5                                                            | 4                                                            |
|                  |                       |                                      |                                                              |                                                                   |                     |                                      |                                                                     | 8              | 5                                                            | 4                                                            |

| No of respondent | Profession | Knowledge of the AGREE II instrument | Performance of appraisals using the AGREE I or II instrument | Number of appraised guidelines using the AGREE I or II instrument | Experience in years | Involvement in guideline development | Purpose of conducting appraisals using the AGREE I or II instrument | AGREE II Items | Assessment of the influence on <u>methodological quality</u> | Assessment of the influence on <u>recommendation for use</u> |
|------------------|------------|--------------------------------------|--------------------------------------------------------------|-------------------------------------------------------------------|---------------------|--------------------------------------|---------------------------------------------------------------------|----------------|--------------------------------------------------------------|--------------------------------------------------------------|
|                  |            |                                      |                                                              |                                                                   |                     |                                      |                                                                     | 9              | 5                                                            | 4                                                            |
|                  |            |                                      |                                                              |                                                                   |                     |                                      |                                                                     | 10             | 5                                                            | 4                                                            |
|                  |            |                                      |                                                              |                                                                   |                     |                                      |                                                                     | 11             | 4                                                            | 4                                                            |
|                  |            |                                      |                                                              |                                                                   |                     |                                      |                                                                     | 12             | 5                                                            | 4                                                            |
|                  |            |                                      |                                                              |                                                                   |                     |                                      |                                                                     | 13             | 4                                                            | 4                                                            |
|                  |            |                                      |                                                              |                                                                   |                     |                                      |                                                                     | 14             | 2                                                            | 2                                                            |
|                  |            |                                      |                                                              |                                                                   |                     |                                      |                                                                     | 15             | 4                                                            | 5                                                            |
|                  |            |                                      |                                                              |                                                                   |                     |                                      |                                                                     | 16             | 4                                                            | 4                                                            |
|                  |            |                                      |                                                              |                                                                   |                     |                                      |                                                                     | 17             | 3                                                            | 5                                                            |
|                  |            |                                      |                                                              |                                                                   |                     |                                      |                                                                     | 18             | 2                                                            | 3                                                            |
|                  |            |                                      |                                                              |                                                                   |                     |                                      |                                                                     | 19             | 1                                                            | 3                                                            |
|                  |            |                                      |                                                              |                                                                   |                     |                                      |                                                                     | 20             | 2                                                            | 3                                                            |
|                  |            |                                      |                                                              |                                                                   |                     |                                      |                                                                     | 21             | 3                                                            | 4                                                            |
| 18 <sup>b</sup>  | Physician  | no                                   | no                                                           | -                                                                 | -                   | yes                                  | -                                                                   | 1              | 4                                                            | 4                                                            |
|                  |            |                                      |                                                              |                                                                   |                     |                                      |                                                                     | 2              | 4                                                            | 4                                                            |
|                  |            |                                      |                                                              |                                                                   |                     |                                      |                                                                     | 3              | 4                                                            | 4                                                            |
|                  |            |                                      |                                                              |                                                                   |                     |                                      |                                                                     | 4              | 3                                                            | 3                                                            |
|                  |            |                                      |                                                              |                                                                   |                     |                                      |                                                                     | 5              | 3                                                            | 3                                                            |
|                  |            |                                      |                                                              |                                                                   |                     |                                      |                                                                     | 6              | 4                                                            | 4                                                            |

| No of respondent | Profession | Knowledge of the AGREE II instrument | Performance of appraisals using the AGREE I or II instrument | Number of appraised guidelines using the AGREE I or II instrument | Experience in years | Involvement in guideline development | Purpose of conducting appraisals using the AGREE I or II instrument | AGREE II Items | Assessment of the influence on <u>methodological quality</u> | Assessment of the influence on <u>recommendation for use</u> |
|------------------|------------|--------------------------------------|--------------------------------------------------------------|-------------------------------------------------------------------|---------------------|--------------------------------------|---------------------------------------------------------------------|----------------|--------------------------------------------------------------|--------------------------------------------------------------|
|                  |            |                                      |                                                              |                                                                   |                     |                                      |                                                                     | 7              | 4                                                            | 4                                                            |
|                  |            |                                      |                                                              |                                                                   |                     |                                      |                                                                     | 8              | 4                                                            | 4                                                            |
|                  |            |                                      |                                                              |                                                                   |                     |                                      |                                                                     | 9              | 3                                                            | 3                                                            |
|                  |            |                                      |                                                              |                                                                   |                     |                                      |                                                                     | 10             | 3                                                            | 3                                                            |
|                  |            |                                      |                                                              |                                                                   |                     |                                      |                                                                     | 11             | 4                                                            | 4                                                            |
|                  |            |                                      |                                                              |                                                                   |                     |                                      |                                                                     | 12             | 3                                                            | 3                                                            |
|                  |            |                                      |                                                              |                                                                   |                     |                                      |                                                                     | 13             | 4                                                            | 4                                                            |
|                  |            |                                      |                                                              |                                                                   |                     |                                      |                                                                     | 14             | 4                                                            | 4                                                            |
|                  |            |                                      |                                                              |                                                                   |                     |                                      |                                                                     | 15             | 4                                                            | 4                                                            |
|                  |            |                                      |                                                              |                                                                   |                     |                                      |                                                                     | 16             | 4                                                            | 4                                                            |
|                  |            |                                      |                                                              |                                                                   |                     |                                      |                                                                     | 17             | 4                                                            | 4                                                            |
|                  |            |                                      |                                                              |                                                                   |                     |                                      |                                                                     | 18             | 3                                                            | 3                                                            |
|                  |            |                                      |                                                              |                                                                   |                     |                                      |                                                                     | 19             | 4                                                            | 4                                                            |
|                  |            |                                      |                                                              |                                                                   |                     |                                      |                                                                     | 20             | 3                                                            | 3                                                            |
|                  |            |                                      |                                                              |                                                                   |                     |                                      |                                                                     | 21             | 4                                                            | 4                                                            |
|                  |            |                                      |                                                              |                                                                   |                     |                                      |                                                                     | 22             | 3                                                            | 3                                                            |
|                  |            |                                      |                                                              |                                                                   |                     |                                      |                                                                     | 23             | 4                                                            | 4                                                            |
| 19 <sup>a</sup>  | other      | yes                                  | no                                                           | -                                                                 | -                   | yes                                  | -                                                                   | 1              | -                                                            | -                                                            |
|                  |            |                                      |                                                              |                                                                   |                     |                                      |                                                                     | 2              | -                                                            | -                                                            |
|                  |            |                                      |                                                              |                                                                   |                     |                                      |                                                                     | 3              | -                                                            | -                                                            |
|                  |            |                                      |                                                              |                                                                   |                     |                                      |                                                                     | 4              | -                                                            | -                                                            |

| No of respondent | Profession            | Knowledge of the AGREE II instrument | Performance of appraisals using the AGREE I or II instrument | Number of appraised guidelines using the AGREE I or II instrument | Experience in years | Involvement in guideline development | Purpose of conducting appraisals using the AGREE I or II instrument | AGREE II Items | Assessment of the influence on <u>methodological quality</u> | Assessment of the influence on <u>recommendation for use</u> |
|------------------|-----------------------|--------------------------------------|--------------------------------------------------------------|-------------------------------------------------------------------|---------------------|--------------------------------------|---------------------------------------------------------------------|----------------|--------------------------------------------------------------|--------------------------------------------------------------|
|                  |                       |                                      |                                                              |                                                                   |                     |                                      |                                                                     | 5              | -                                                            | -                                                            |
|                  |                       |                                      |                                                              |                                                                   |                     |                                      |                                                                     | 6              | -                                                            | -                                                            |
|                  |                       |                                      |                                                              |                                                                   |                     |                                      |                                                                     | 7              | -                                                            | -                                                            |
|                  |                       |                                      |                                                              |                                                                   |                     |                                      |                                                                     | 8              | -                                                            | -                                                            |
|                  |                       |                                      |                                                              |                                                                   |                     |                                      |                                                                     | 9              | -                                                            | -                                                            |
|                  |                       |                                      |                                                              |                                                                   |                     |                                      |                                                                     | 10             | -                                                            | -                                                            |
|                  |                       |                                      |                                                              |                                                                   |                     |                                      |                                                                     | 11             | -                                                            | -                                                            |
|                  |                       |                                      |                                                              |                                                                   |                     |                                      |                                                                     | 12             | -                                                            | -                                                            |
|                  |                       |                                      |                                                              |                                                                   |                     |                                      |                                                                     | 13             | -                                                            | -                                                            |
|                  |                       |                                      |                                                              |                                                                   |                     |                                      |                                                                     | 14             | -                                                            | -                                                            |
|                  |                       |                                      |                                                              |                                                                   |                     |                                      |                                                                     | 15             | -                                                            | -                                                            |
|                  |                       |                                      |                                                              |                                                                   |                     |                                      |                                                                     | 16             | -                                                            | -                                                            |
|                  |                       |                                      |                                                              |                                                                   |                     |                                      |                                                                     | 17             | -                                                            | -                                                            |
|                  |                       |                                      |                                                              |                                                                   |                     |                                      |                                                                     | 18             | -                                                            | -                                                            |
|                  |                       |                                      |                                                              |                                                                   |                     |                                      |                                                                     | 19             | -                                                            | -                                                            |
|                  |                       |                                      |                                                              |                                                                   |                     |                                      |                                                                     | 20             | -                                                            | -                                                            |
|                  |                       |                                      |                                                              |                                                                   |                     |                                      |                                                                     | 21             | -                                                            | -                                                            |
|                  |                       |                                      |                                                              |                                                                   |                     |                                      |                                                                     | 22             | -                                                            | -                                                            |
|                  |                       |                                      |                                                              |                                                                   |                     |                                      |                                                                     | 23             | -                                                            | -                                                            |
| 20 <sup>a</sup>  | methodological expert | yes                                  | yes                                                          | > 20 guidelines                                                   | 1-5 years           | no                                   | Writing of guideline                                                | 1              | -                                                            | -                                                            |
|                  |                       |                                      |                                                              |                                                                   |                     |                                      |                                                                     | 2              | -                                                            | -                                                            |

| No of respondent | Profession | Knowledge of the AGREE II instrument | Performance of appraisals using the AGREE I or II instrument | Number of appraised guidelines using the AGREE I or II instrument | Experience in years | Involvement in guideline development | Purpose of conducting appraisals using the AGREE I or II instrument | AGREE II Items | Assessment of the influence on <u>methodological quality</u> | Assessment of the influence on <u>recommendation for use</u> |
|------------------|------------|--------------------------------------|--------------------------------------------------------------|-------------------------------------------------------------------|---------------------|--------------------------------------|---------------------------------------------------------------------|----------------|--------------------------------------------------------------|--------------------------------------------------------------|
|                  |            |                                      |                                                              |                                                                   |                     |                                      | synopses                                                            | 3              | -                                                            | -                                                            |
|                  |            |                                      |                                                              |                                                                   |                     | 4                                    |                                                                     | -              | -                                                            |                                                              |
|                  |            |                                      |                                                              |                                                                   |                     | 5                                    |                                                                     | -              | -                                                            |                                                              |
|                  |            |                                      |                                                              |                                                                   |                     | 6                                    |                                                                     | -              | -                                                            |                                                              |
|                  |            |                                      |                                                              |                                                                   |                     | 7                                    |                                                                     | -              | -                                                            |                                                              |
|                  |            |                                      |                                                              |                                                                   |                     | 8                                    |                                                                     | -              | -                                                            |                                                              |
|                  |            |                                      |                                                              |                                                                   |                     | 9                                    |                                                                     | -              | -                                                            |                                                              |
|                  |            |                                      |                                                              |                                                                   |                     | 10                                   |                                                                     | -              | -                                                            |                                                              |
|                  |            |                                      |                                                              |                                                                   |                     | 11                                   |                                                                     | -              | -                                                            |                                                              |
|                  |            |                                      |                                                              |                                                                   |                     | 12                                   |                                                                     | -              | -                                                            |                                                              |
|                  |            |                                      |                                                              |                                                                   |                     | 13                                   |                                                                     | -              | -                                                            |                                                              |
|                  |            |                                      |                                                              |                                                                   |                     | 14                                   |                                                                     | -              | -                                                            |                                                              |
|                  |            |                                      |                                                              |                                                                   |                     | 15                                   |                                                                     | -              | -                                                            |                                                              |
|                  |            |                                      |                                                              |                                                                   |                     | 16                                   |                                                                     | -              | -                                                            |                                                              |
|                  |            |                                      |                                                              |                                                                   |                     | 17                                   |                                                                     | -              | -                                                            |                                                              |
|                  |            |                                      |                                                              |                                                                   |                     | 18                                   |                                                                     | -              | -                                                            |                                                              |
|                  |            |                                      |                                                              |                                                                   |                     | 19                                   |                                                                     | -              | -                                                            |                                                              |
|                  |            |                                      |                                                              |                                                                   |                     | 20                                   |                                                                     | -              | -                                                            |                                                              |
|                  |            |                                      |                                                              |                                                                   |                     | 21                                   |                                                                     | -              | -                                                            |                                                              |
|                  |            |                                      |                                                              |                                                                   |                     | 22                                   |                                                                     | -              | -                                                            |                                                              |
|                  |            |                                      |                                                              |                                                                   |                     | 23                                   |                                                                     | -              | -                                                            |                                                              |

| No of respondent | Profession | Knowledge of the AGREE II instrument | Performance of appraisals using the AGREE I or II instrument | Number of appraised guidelines using the AGREE I or II instrument | Experience in years | Involvement in guideline development | Purpose of conducting appraisals using the AGREE I or II instrument | AGREE II Items | Assessment of the influence on <u>methodological quality</u> | Assessment of the influence on <u>recommendation for use</u> |
|------------------|------------|--------------------------------------|--------------------------------------------------------------|-------------------------------------------------------------------|---------------------|--------------------------------------|---------------------------------------------------------------------|----------------|--------------------------------------------------------------|--------------------------------------------------------------|
| 21               | Physician  | yes                                  | yes                                                          | < 10 guidelines                                                   | 1-5 years           | yes                                  | Development of guidelines, writing of guideline synopses            | 1              | 2                                                            | 2                                                            |
|                  |            |                                      |                                                              |                                                                   |                     |                                      |                                                                     | 2              | 4                                                            | 4                                                            |
|                  |            |                                      |                                                              |                                                                   |                     |                                      |                                                                     | 3              | 5                                                            | 5                                                            |
|                  |            |                                      |                                                              |                                                                   |                     |                                      |                                                                     | 4              | 4                                                            | 4                                                            |
|                  |            |                                      |                                                              |                                                                   |                     |                                      |                                                                     | 5              | 4                                                            | 4                                                            |
|                  |            |                                      |                                                              |                                                                   |                     |                                      |                                                                     | 6              | 5                                                            | 5                                                            |
|                  |            |                                      |                                                              |                                                                   |                     |                                      |                                                                     | 7              | 4                                                            | 4                                                            |
|                  |            |                                      |                                                              |                                                                   |                     |                                      |                                                                     | 8              | 5                                                            | 5                                                            |
|                  |            |                                      |                                                              |                                                                   |                     |                                      |                                                                     | 9              | 5                                                            | 5                                                            |
|                  |            |                                      |                                                              |                                                                   |                     |                                      |                                                                     | 10             | 5                                                            | 5                                                            |
|                  |            |                                      |                                                              |                                                                   |                     |                                      |                                                                     | 11             | 5                                                            | 5                                                            |
|                  |            |                                      |                                                              |                                                                   |                     |                                      |                                                                     | 12             | 4                                                            | 4                                                            |
|                  |            |                                      |                                                              |                                                                   |                     |                                      |                                                                     | 13             | 4                                                            | 4                                                            |
|                  |            |                                      |                                                              |                                                                   |                     |                                      |                                                                     | 14             | 4                                                            | 4                                                            |
|                  |            |                                      |                                                              |                                                                   |                     |                                      |                                                                     | 15             | 4                                                            | 5                                                            |
|                  |            |                                      |                                                              |                                                                   |                     |                                      |                                                                     | 16             | 4                                                            | 5                                                            |
|                  |            |                                      |                                                              |                                                                   |                     |                                      |                                                                     | 17             | 4                                                            | 5                                                            |
|                  |            |                                      |                                                              |                                                                   |                     |                                      |                                                                     | 18             | 3                                                            | 4                                                            |
|                  |            |                                      |                                                              |                                                                   |                     |                                      |                                                                     | 19             | 3                                                            | 4                                                            |
|                  |            |                                      |                                                              |                                                                   |                     |                                      |                                                                     | 20             | 4                                                            | 5                                                            |
|                  |            |                                      |                                                              |                                                                   |                     |                                      |                                                                     | 21             | 4                                                            | 3                                                            |

| No of respondent | Profession | Knowledge of the AGREE II instrument | Performance of appraisals using the AGREE I or II instrument | Number of appraised guidelines using the AGREE I or II instrument | Experience in years | Involvement in guideline development | Purpose of conducting appraisals using the AGREE I or II instrument | AGREE II Items | Assessment of the influence on <u>methodological quality</u> | Assessment of the influence on <u>recommendation for use</u> |
|------------------|------------|--------------------------------------|--------------------------------------------------------------|-------------------------------------------------------------------|---------------------|--------------------------------------|---------------------------------------------------------------------|----------------|--------------------------------------------------------------|--------------------------------------------------------------|
|                  |            |                                      |                                                              |                                                                   |                     |                                      |                                                                     | 22             | 5                                                            | 4                                                            |
|                  |            |                                      |                                                              |                                                                   |                     |                                      |                                                                     | 23             | 5                                                            | 3                                                            |
| 22 <sup>b</sup>  | Physician  | no                                   | no                                                           | -                                                                 | -                   | no                                   | -                                                                   | 1              | 0                                                            | 0                                                            |
|                  |            |                                      |                                                              |                                                                   |                     |                                      |                                                                     | 2              | 3                                                            | 5                                                            |
|                  |            |                                      |                                                              |                                                                   |                     |                                      |                                                                     | 3              | 3                                                            | 5                                                            |
|                  |            |                                      |                                                              |                                                                   |                     |                                      |                                                                     | 4              | 5                                                            | 5                                                            |
|                  |            |                                      |                                                              |                                                                   |                     |                                      |                                                                     | 5              | 5                                                            | 5                                                            |
|                  |            |                                      |                                                              |                                                                   |                     |                                      |                                                                     | 6              | 2                                                            | 5                                                            |
|                  |            |                                      |                                                              |                                                                   |                     |                                      |                                                                     | 7              | 5                                                            | 5                                                            |
|                  |            |                                      |                                                              |                                                                   |                     |                                      |                                                                     | 8              | 5                                                            | 5                                                            |
|                  |            |                                      |                                                              |                                                                   |                     |                                      |                                                                     | 9              | 5                                                            | 5                                                            |
|                  |            |                                      |                                                              |                                                                   |                     |                                      |                                                                     | 10             | 5                                                            | 2                                                            |
|                  |            |                                      |                                                              |                                                                   |                     |                                      |                                                                     | 11             | 5                                                            | 5                                                            |
|                  |            |                                      |                                                              |                                                                   |                     |                                      |                                                                     | 12             | 5                                                            | 5                                                            |
|                  |            |                                      |                                                              |                                                                   |                     |                                      |                                                                     | 13             | 5                                                            | 3                                                            |
|                  |            |                                      |                                                              |                                                                   |                     |                                      |                                                                     | 14             | 3                                                            | 1                                                            |
|                  |            |                                      |                                                              |                                                                   |                     |                                      |                                                                     | 15             | 5                                                            | 5                                                            |
|                  |            |                                      |                                                              |                                                                   |                     |                                      |                                                                     | 16             | 5                                                            | 5                                                            |
|                  |            |                                      |                                                              |                                                                   |                     |                                      |                                                                     | 17             | 3                                                            | 3                                                            |
|                  |            |                                      |                                                              |                                                                   |                     |                                      |                                                                     | 18             | 1                                                            | 1                                                            |
|                  |            |                                      |                                                              |                                                                   |                     |                                      |                                                                     | 19             | 1                                                            | 1                                                            |



| No of respondent | Profession                        | Knowledge of the AGREE II instrument | Performance of appraisals using the AGREE I or II instrument | Number of appraised guidelines using the AGREE I or II instrument | Experience in years | Involvement in guideline development | Purpose of conducting appraisals using the AGREE I or II instrument | AGREE II Items | Assessment of the influence on <u>methodological quality</u> | Assessment of the influence on <u>recommendation for use</u> |
|------------------|-----------------------------------|--------------------------------------|--------------------------------------------------------------|-------------------------------------------------------------------|---------------------|--------------------------------------|---------------------------------------------------------------------|----------------|--------------------------------------------------------------|--------------------------------------------------------------|
|                  |                                   |                                      |                                                              |                                                                   |                     |                                      |                                                                     | 20             | 1                                                            | 5                                                            |
|                  |                                   |                                      |                                                              |                                                                   |                     |                                      |                                                                     | 21             | 5                                                            | 5                                                            |
|                  |                                   |                                      |                                                              |                                                                   |                     |                                      |                                                                     | 22             | 5                                                            | 5                                                            |
|                  |                                   |                                      |                                                              |                                                                   |                     |                                      |                                                                     | 23             | 5                                                            | 5                                                            |
| 23               | Physician / methodological expert | yes                                  | yes                                                          | > 20 guidelines                                                   | > 5 years           | yes                                  | Writing of guideline synopses, Assessment of guideline quality      | 1              | 2                                                            | 3                                                            |
|                  |                                   |                                      |                                                              |                                                                   |                     |                                      |                                                                     | 2              | 2                                                            | 3                                                            |
|                  |                                   |                                      |                                                              |                                                                   |                     |                                      |                                                                     | 3              | 2                                                            | 3                                                            |
|                  |                                   |                                      |                                                              |                                                                   |                     |                                      |                                                                     | 4              | 1                                                            | 2                                                            |
|                  |                                   |                                      |                                                              |                                                                   |                     |                                      |                                                                     | 5              | 1                                                            | 3                                                            |
|                  |                                   |                                      |                                                              |                                                                   |                     |                                      |                                                                     | 6              | 1                                                            | 3                                                            |
|                  |                                   |                                      |                                                              |                                                                   |                     |                                      |                                                                     | 7              | 5                                                            | 5                                                            |
|                  |                                   |                                      |                                                              |                                                                   |                     |                                      |                                                                     | 8              | 5                                                            | 5                                                            |
|                  |                                   |                                      |                                                              |                                                                   |                     |                                      |                                                                     | 9              | 5                                                            | 5                                                            |
|                  |                                   |                                      |                                                              |                                                                   |                     |                                      |                                                                     | 10             | 5                                                            | 5                                                            |
|                  |                                   |                                      |                                                              |                                                                   |                     |                                      |                                                                     | 11             | 5                                                            | 5                                                            |
|                  |                                   |                                      |                                                              |                                                                   |                     |                                      |                                                                     | 12             | 5                                                            | 5                                                            |
|                  |                                   |                                      |                                                              |                                                                   |                     |                                      |                                                                     | 13             | 3                                                            | 3                                                            |
|                  |                                   |                                      |                                                              |                                                                   |                     |                                      |                                                                     | 14             | 1                                                            | 1                                                            |
| 15               | 4                                 | 4                                    |                                                              |                                                                   |                     |                                      |                                                                     |                |                                                              |                                                              |
| 16               | 4                                 | 4                                    |                                                              |                                                                   |                     |                                      |                                                                     |                |                                                              |                                                              |
| 17               | 4                                 | 4                                    |                                                              |                                                                   |                     |                                      |                                                                     |                |                                                              |                                                              |

| No of respondent | Profession                        | Knowledge of the AGREE II instrument | Performance of appraisals using the AGREE I or II instrument | Number of appraised guidelines using the AGREE I or II instrument | Experience in years | Involvement in guideline development | Purpose of conducting appraisals using the AGREE I or II instrument | AGREE II Items | Assessment of the influence on <u>methodological quality</u> | Assessment of the influence on <u>recommendation for use</u> |
|------------------|-----------------------------------|--------------------------------------|--------------------------------------------------------------|-------------------------------------------------------------------|---------------------|--------------------------------------|---------------------------------------------------------------------|----------------|--------------------------------------------------------------|--------------------------------------------------------------|
|                  |                                   |                                      |                                                              |                                                                   |                     |                                      |                                                                     | 18             | 1                                                            | 3                                                            |
|                  |                                   |                                      |                                                              |                                                                   |                     |                                      |                                                                     | 19             | 1                                                            | 3                                                            |
|                  |                                   |                                      |                                                              |                                                                   |                     |                                      |                                                                     | 20             | 1                                                            | 3                                                            |
|                  |                                   |                                      |                                                              |                                                                   |                     |                                      |                                                                     | 21             | 3                                                            | 3                                                            |
|                  |                                   |                                      |                                                              |                                                                   |                     |                                      |                                                                     | 22             | 5                                                            | 5                                                            |
|                  |                                   |                                      |                                                              |                                                                   |                     |                                      |                                                                     | 23             | 5                                                            | 5                                                            |
| 24               | Physician / methodological expert | yes                                  | yes                                                          | 10-20 guidelines                                                  | 1-5 years           | yes                                  | Adaptation of guidelines                                            | 1              | 1                                                            | 2                                                            |
|                  |                                   |                                      |                                                              |                                                                   |                     |                                      |                                                                     | 2              | 1                                                            | 2                                                            |
|                  |                                   |                                      |                                                              |                                                                   |                     |                                      |                                                                     | 3              | 2                                                            | 2                                                            |
|                  |                                   |                                      |                                                              |                                                                   |                     |                                      |                                                                     | 4              | 3                                                            | 4                                                            |
|                  |                                   |                                      |                                                              |                                                                   |                     |                                      |                                                                     | 5              | 3                                                            | 4                                                            |
|                  |                                   |                                      |                                                              |                                                                   |                     |                                      |                                                                     | 6              | 1                                                            | 1                                                            |
|                  |                                   |                                      |                                                              |                                                                   |                     |                                      |                                                                     | 7              | 5                                                            | 4                                                            |
|                  |                                   |                                      |                                                              |                                                                   |                     |                                      |                                                                     | 8              | 5                                                            | 4                                                            |
|                  |                                   |                                      |                                                              |                                                                   |                     |                                      |                                                                     | 9              | 5                                                            | 5                                                            |
|                  |                                   |                                      |                                                              |                                                                   |                     |                                      |                                                                     | 10             | 4                                                            | 5                                                            |
|                  |                                   |                                      |                                                              |                                                                   |                     |                                      |                                                                     | 11             | 5                                                            | 5                                                            |
|                  |                                   |                                      |                                                              |                                                                   |                     |                                      |                                                                     | 12             | 5                                                            | 4                                                            |
|                  |                                   |                                      |                                                              |                                                                   |                     |                                      |                                                                     | 13             | 3                                                            | 2                                                            |
| 14               | 3                                 | 3                                    |                                                              |                                                                   |                     |                                      |                                                                     |                |                                                              |                                                              |
| 15               | 3                                 | 4                                    |                                                              |                                                                   |                     |                                      |                                                                     |                |                                                              |                                                              |

| No of respondent | Profession            | Knowledge of the AGREE II instrument | Performance of appraisals using the AGREE I or II instrument | Number of appraised guidelines using the AGREE I or II instrument | Experience in years | Involvement in guideline development | Purpose of conducting appraisals using the AGREE I or II instrument | AGREE II Items | Assessment of the influence on <u>methodological quality</u> | Assessment of the influence on <u>recommendation for use</u> |
|------------------|-----------------------|--------------------------------------|--------------------------------------------------------------|-------------------------------------------------------------------|---------------------|--------------------------------------|---------------------------------------------------------------------|----------------|--------------------------------------------------------------|--------------------------------------------------------------|
|                  |                       |                                      |                                                              |                                                                   |                     |                                      |                                                                     | 16             | 3                                                            | 4                                                            |
|                  |                       |                                      |                                                              |                                                                   |                     |                                      |                                                                     | 17             | 3                                                            | 3                                                            |
|                  |                       |                                      |                                                              |                                                                   |                     |                                      |                                                                     | 18             | 3                                                            | 4                                                            |
|                  |                       |                                      |                                                              |                                                                   |                     |                                      |                                                                     | 19             | 3                                                            | 4                                                            |
|                  |                       |                                      |                                                              |                                                                   |                     |                                      |                                                                     | 20             | 3                                                            | 4                                                            |
|                  |                       |                                      |                                                              |                                                                   |                     |                                      |                                                                     | 21             | 3                                                            | 4                                                            |
|                  |                       |                                      |                                                              |                                                                   |                     |                                      |                                                                     | 22             | 4                                                            | 5                                                            |
|                  |                       |                                      |                                                              |                                                                   |                     |                                      |                                                                     | 23             | 4                                                            | 5                                                            |
| 25               | methodological expert | yes                                  | yes                                                          | 10-20 guidelines                                                  | 1-5 years           | yes                                  | Application in clinical practice                                    | 1              | 5                                                            | 5                                                            |
|                  |                       |                                      |                                                              |                                                                   |                     |                                      |                                                                     | 2              | 4                                                            | 4                                                            |
|                  |                       |                                      |                                                              |                                                                   |                     |                                      |                                                                     | 3              | 5                                                            | 5                                                            |
|                  |                       |                                      |                                                              |                                                                   |                     |                                      |                                                                     | 4              | 3                                                            | 1                                                            |
|                  |                       |                                      |                                                              |                                                                   |                     |                                      |                                                                     | 5              | 3                                                            | 1                                                            |
|                  |                       |                                      |                                                              |                                                                   |                     |                                      |                                                                     | 6              | 5                                                            | 5                                                            |
|                  |                       |                                      |                                                              |                                                                   |                     |                                      |                                                                     | 7              | 5                                                            | 5                                                            |
|                  |                       |                                      |                                                              |                                                                   |                     |                                      |                                                                     | 8              | 5                                                            | 5                                                            |
|                  |                       |                                      |                                                              |                                                                   |                     |                                      |                                                                     | 9              | 5                                                            | 5                                                            |
|                  |                       |                                      |                                                              |                                                                   |                     |                                      |                                                                     | 10             | 5                                                            | 5                                                            |
|                  |                       |                                      |                                                              |                                                                   |                     |                                      |                                                                     | 11             | 5                                                            | 5                                                            |
|                  |                       |                                      |                                                              |                                                                   |                     |                                      |                                                                     | 12             | 5                                                            | 5                                                            |
|                  |                       |                                      |                                                              |                                                                   |                     |                                      |                                                                     | 13             | 4                                                            | 2                                                            |

| No of respondent | Profession | Knowledge of the AGREE II instrument | Performance of appraisals using the AGREE I or II instrument | Number of appraised guidelines using the AGREE I or II instrument | Experience in years | Involvement in guideline development | Purpose of conducting appraisals using the AGREE I or II instrument | AGREE II Items | Assessment of the influence on <u>methodological quality</u> | Assessment of the influence on <u>recommendation for use</u> |
|------------------|------------|--------------------------------------|--------------------------------------------------------------|-------------------------------------------------------------------|---------------------|--------------------------------------|---------------------------------------------------------------------|----------------|--------------------------------------------------------------|--------------------------------------------------------------|
|                  |            |                                      |                                                              |                                                                   |                     |                                      |                                                                     | 14             | 2                                                            | 2                                                            |
|                  |            |                                      |                                                              |                                                                   |                     |                                      |                                                                     | 15             | 5                                                            | 5                                                            |
|                  |            |                                      |                                                              |                                                                   |                     |                                      |                                                                     | 16             | 4                                                            | 4                                                            |
|                  |            |                                      |                                                              |                                                                   |                     |                                      |                                                                     | 17             | 5                                                            | 5                                                            |
|                  |            |                                      |                                                              |                                                                   |                     |                                      |                                                                     | 18             | 4                                                            | 2                                                            |
|                  |            |                                      |                                                              |                                                                   |                     |                                      |                                                                     | 19             | 3                                                            | 2                                                            |
|                  |            |                                      |                                                              |                                                                   |                     |                                      |                                                                     | 20             | 3                                                            | 2                                                            |
|                  |            |                                      |                                                              |                                                                   |                     |                                      |                                                                     | 21             | 2                                                            | 2                                                            |
|                  |            |                                      |                                                              |                                                                   |                     |                                      |                                                                     | 22             | 5                                                            | 5                                                            |
|                  |            |                                      |                                                              |                                                                   |                     |                                      |                                                                     | 23             | 5                                                            | 5                                                            |
| 26               | Physician  | yes                                  | yes                                                          | < 10 guidelines                                                   | < 1 year            | no                                   | Assessment of guideline quality                                     | 1              | 4                                                            | 4                                                            |
|                  |            |                                      |                                                              |                                                                   |                     |                                      |                                                                     | 2              | 4                                                            | 4                                                            |
|                  |            |                                      |                                                              |                                                                   |                     |                                      |                                                                     | 3              | 4                                                            | 4                                                            |
|                  |            |                                      |                                                              |                                                                   |                     |                                      |                                                                     | 4              | 4                                                            | 5                                                            |
|                  |            |                                      |                                                              |                                                                   |                     |                                      |                                                                     | 5              | 2                                                            | 2                                                            |
|                  |            |                                      |                                                              |                                                                   |                     |                                      |                                                                     | 6              | 4                                                            | 4                                                            |
|                  |            |                                      |                                                              |                                                                   |                     |                                      |                                                                     | 7              | 5                                                            | 5                                                            |
|                  |            |                                      |                                                              |                                                                   |                     |                                      |                                                                     | 8              | 5                                                            | 5                                                            |
|                  |            |                                      |                                                              |                                                                   |                     |                                      |                                                                     | 9              | 5                                                            | 5                                                            |
|                  |            |                                      |                                                              |                                                                   |                     |                                      |                                                                     | 10             | 5                                                            | 5                                                            |
|                  |            |                                      |                                                              |                                                                   |                     |                                      |                                                                     | 11             | 5                                                            | 5                                                            |

| No of respondent | Profession | Knowledge of the AGREE II instrument | Performance of appraisals using the AGREE I or II instrument | Number of appraised guidelines using the AGREE I or II instrument | Experience in years | Involvement in guideline development | Purpose of conducting appraisals using the AGREE I or II instrument | AGREE II Items | Assessment of the influence on <u>methodological quality</u> | Assessment of the influence on <u>recommendation for use</u> |
|------------------|------------|--------------------------------------|--------------------------------------------------------------|-------------------------------------------------------------------|---------------------|--------------------------------------|---------------------------------------------------------------------|----------------|--------------------------------------------------------------|--------------------------------------------------------------|
|                  |            |                                      |                                                              |                                                                   |                     |                                      |                                                                     | 12             | 5                                                            | 5                                                            |
|                  |            |                                      |                                                              |                                                                   |                     |                                      |                                                                     | 13             | 4                                                            | 5                                                            |
|                  |            |                                      |                                                              |                                                                   |                     |                                      |                                                                     | 14             | 5                                                            | 5                                                            |
|                  |            |                                      |                                                              |                                                                   |                     |                                      |                                                                     | 15             | 4                                                            | 5                                                            |
|                  |            |                                      |                                                              |                                                                   |                     |                                      |                                                                     | 16             | 4                                                            | 5                                                            |
|                  |            |                                      |                                                              |                                                                   |                     |                                      |                                                                     | 17             | 5                                                            | 5                                                            |
|                  |            |                                      |                                                              |                                                                   |                     |                                      |                                                                     | 18             | 5                                                            | 4                                                            |
|                  |            |                                      |                                                              |                                                                   |                     |                                      |                                                                     | 19             | 4                                                            | 5                                                            |
|                  |            |                                      |                                                              |                                                                   |                     |                                      |                                                                     | 20             | 4                                                            | 5                                                            |
|                  |            |                                      |                                                              |                                                                   |                     |                                      |                                                                     | 21             | 4                                                            | 4                                                            |
|                  |            |                                      |                                                              |                                                                   |                     |                                      |                                                                     | 22             | 4                                                            | 4                                                            |
|                  |            |                                      |                                                              |                                                                   |                     |                                      |                                                                     | 23             | 5                                                            | 4                                                            |
| 27               | Physician  | yes                                  | yes                                                          | 10-20 guidelines                                                  | 1-5 years           | no                                   | Assessment of guideline quality                                     | 1              | 1                                                            | 4                                                            |
|                  |            |                                      |                                                              |                                                                   |                     |                                      |                                                                     | 2              | 1                                                            | 4                                                            |
|                  |            |                                      |                                                              |                                                                   |                     |                                      |                                                                     | 3              | 1                                                            | 5                                                            |
|                  |            |                                      |                                                              |                                                                   |                     |                                      |                                                                     | 4              | 5                                                            | 5                                                            |
|                  |            |                                      |                                                              |                                                                   |                     |                                      |                                                                     | 5              | 1                                                            | 1                                                            |
|                  |            |                                      |                                                              |                                                                   |                     |                                      |                                                                     | 6              | 2                                                            | 4                                                            |
|                  |            |                                      |                                                              |                                                                   |                     |                                      |                                                                     | 7              | 5                                                            | 5                                                            |
|                  |            |                                      |                                                              |                                                                   |                     |                                      |                                                                     | 8              | 4                                                            | 4                                                            |
|                  |            |                                      |                                                              |                                                                   |                     |                                      |                                                                     | 9              | 5                                                            | 5                                                            |

| No of respondent | Profession | Knowledge of the AGREE II instrument | Performance of appraisals using the AGREE I or II instrument | Number of appraised guidelines using the AGREE I or II instrument | Experience in years | Involvement in guideline development | Purpose of conducting appraisals using the AGREE I or II instrument | AGREE II Items | Assessment of the influence on <u>methodological quality</u> | Assessment of the influence on <u>recommendation for use</u> |
|------------------|------------|--------------------------------------|--------------------------------------------------------------|-------------------------------------------------------------------|---------------------|--------------------------------------|---------------------------------------------------------------------|----------------|--------------------------------------------------------------|--------------------------------------------------------------|
|                  |            |                                      |                                                              |                                                                   |                     |                                      |                                                                     | 10             | 4                                                            | 3                                                            |
|                  |            |                                      |                                                              |                                                                   |                     |                                      |                                                                     | 11             | 5                                                            | 5                                                            |
|                  |            |                                      |                                                              |                                                                   |                     |                                      |                                                                     | 12             | 5                                                            | 5                                                            |
|                  |            |                                      |                                                              |                                                                   |                     |                                      |                                                                     | 13             | 5                                                            | 5                                                            |
|                  |            |                                      |                                                              |                                                                   |                     |                                      |                                                                     | 14             | 4                                                            | 4                                                            |
|                  |            |                                      |                                                              |                                                                   |                     |                                      |                                                                     | 15             | 4                                                            | 5                                                            |
|                  |            |                                      |                                                              |                                                                   |                     |                                      |                                                                     | 16             | 4                                                            | 5                                                            |
|                  |            |                                      |                                                              |                                                                   |                     |                                      |                                                                     | 17             | 3                                                            | 5                                                            |
|                  |            |                                      |                                                              |                                                                   |                     |                                      |                                                                     | 18             | 3                                                            | 3                                                            |
|                  |            |                                      |                                                              |                                                                   |                     |                                      |                                                                     | 19             | 4                                                            | 5                                                            |
|                  |            |                                      |                                                              |                                                                   |                     |                                      |                                                                     | 20             | 4                                                            | 5                                                            |
|                  |            |                                      |                                                              |                                                                   |                     |                                      |                                                                     | 21             | 3                                                            | 4                                                            |
|                  |            |                                      |                                                              |                                                                   |                     |                                      |                                                                     | 22             | 5                                                            | 5                                                            |
|                  |            |                                      |                                                              |                                                                   |                     |                                      |                                                                     | 23             | 5                                                            | 5                                                            |
| 28               | other      | yes                                  | yes                                                          | < 10 guidelines                                                   | 1-5 years           | yes                                  | Assessment of guideline quality, Updating of guidelines             | 1              | 4                                                            | 4                                                            |
|                  |            |                                      |                                                              |                                                                   |                     |                                      |                                                                     | 2              | 3                                                            | 4                                                            |
|                  |            |                                      |                                                              |                                                                   |                     |                                      |                                                                     | 3              | 3                                                            | 4                                                            |
|                  |            |                                      |                                                              |                                                                   |                     |                                      |                                                                     | 4              | 3                                                            | 3                                                            |
|                  |            |                                      |                                                              |                                                                   |                     |                                      |                                                                     | 5              | 1                                                            | 5                                                            |
|                  |            |                                      |                                                              |                                                                   |                     |                                      |                                                                     | 6              | 2                                                            | 4                                                            |
|                  |            |                                      |                                                              |                                                                   |                     |                                      |                                                                     | 7              | 3                                                            | 5                                                            |

| No of respondent | Profession | Knowledge of the AGREE II instrument | Performance of appraisals using the AGREE I or II instrument | Number of appraised guidelines using the AGREE I or II instrument | Experience in years | Involvement in guideline development | Purpose of conducting appraisals using the AGREE I or II instrument | AGREE II Items | Assessment of the influence on <u>methodological quality</u> | Assessment of the influence on <u>recommendation for use</u> |
|------------------|------------|--------------------------------------|--------------------------------------------------------------|-------------------------------------------------------------------|---------------------|--------------------------------------|---------------------------------------------------------------------|----------------|--------------------------------------------------------------|--------------------------------------------------------------|
|                  |            |                                      |                                                              |                                                                   |                     |                                      |                                                                     | 8              | 2                                                            | 5                                                            |
|                  |            |                                      |                                                              |                                                                   |                     |                                      |                                                                     | 9              | 2                                                            | 5                                                            |
|                  |            |                                      |                                                              |                                                                   |                     |                                      |                                                                     | 10             | 4                                                            | 5                                                            |
|                  |            |                                      |                                                              |                                                                   |                     |                                      |                                                                     | 11             | 2                                                            | 5                                                            |
|                  |            |                                      |                                                              |                                                                   |                     |                                      |                                                                     | 12             | 2                                                            | 5                                                            |
|                  |            |                                      |                                                              |                                                                   |                     |                                      |                                                                     | 13             | 4                                                            | 5                                                            |
|                  |            |                                      |                                                              |                                                                   |                     |                                      |                                                                     | 14             | 3                                                            | 4                                                            |
|                  |            |                                      |                                                              |                                                                   |                     |                                      |                                                                     | 15             | 4                                                            | 5                                                            |
|                  |            |                                      |                                                              |                                                                   |                     |                                      |                                                                     | 16             | 3                                                            | 5                                                            |
|                  |            |                                      |                                                              |                                                                   |                     |                                      |                                                                     | 17             | 4                                                            | 4                                                            |
|                  |            |                                      |                                                              |                                                                   |                     |                                      |                                                                     | 18             | 1                                                            | 4                                                            |
|                  |            |                                      |                                                              |                                                                   |                     |                                      |                                                                     | 19             | 1                                                            | 4                                                            |
|                  |            |                                      |                                                              |                                                                   |                     |                                      |                                                                     | 20             | 1                                                            | 4                                                            |
|                  |            |                                      |                                                              |                                                                   |                     |                                      |                                                                     | 21             | 1                                                            | 4                                                            |
| 22               | 4          | 5                                    |                                                              |                                                                   |                     |                                      |                                                                     |                |                                                              |                                                              |
| 23               | 4          | 5                                    |                                                              |                                                                   |                     |                                      |                                                                     |                |                                                              |                                                              |
| 29               | other      | yes                                  | yes                                                          | > 20 guidelines                                                   | 1-5 years           | no                                   | Assessment of guideline quality                                     | 1              | 4                                                            | 4                                                            |
|                  |            |                                      |                                                              |                                                                   |                     |                                      |                                                                     | 2              | 4                                                            | 4                                                            |
|                  |            |                                      |                                                              |                                                                   |                     |                                      |                                                                     | 3              | 5                                                            | 5                                                            |
|                  |            |                                      |                                                              |                                                                   |                     |                                      |                                                                     | 4              | 4                                                            | 4                                                            |
|                  |            |                                      |                                                              |                                                                   |                     |                                      |                                                                     | 5              | 4                                                            | 4                                                            |

| No of respondent | Profession                        | Knowledge of the AGREE II instrument | Performance of appraisals using the AGREE I or II instrument | Number of appraised guidelines using the AGREE I or II instrument | Experience in years | Involvement in guideline development | Purpose of conducting appraisals using the AGREE I or II instrument | AGREE II Items | Assessment of the influence on <u>methodological quality</u> | Assessment of the influence on <u>recommendation for use</u> |
|------------------|-----------------------------------|--------------------------------------|--------------------------------------------------------------|-------------------------------------------------------------------|---------------------|--------------------------------------|---------------------------------------------------------------------|----------------|--------------------------------------------------------------|--------------------------------------------------------------|
|                  |                                   |                                      |                                                              |                                                                   |                     |                                      |                                                                     | 6              | 4                                                            | 5                                                            |
|                  |                                   |                                      |                                                              |                                                                   |                     |                                      |                                                                     | 7              | 5                                                            | 5                                                            |
|                  |                                   |                                      |                                                              |                                                                   |                     |                                      |                                                                     | 8              | 5                                                            | 5                                                            |
|                  |                                   |                                      |                                                              |                                                                   |                     |                                      |                                                                     | 9              | 4                                                            | 4                                                            |
|                  |                                   |                                      |                                                              |                                                                   |                     |                                      |                                                                     | 10             | 4                                                            | 4                                                            |
|                  |                                   |                                      |                                                              |                                                                   |                     |                                      |                                                                     | 11             | 5                                                            | 5                                                            |
|                  |                                   |                                      |                                                              |                                                                   |                     |                                      |                                                                     | 12             | 5                                                            | 5                                                            |
|                  |                                   |                                      |                                                              |                                                                   |                     |                                      |                                                                     | 13             | 5                                                            | 5                                                            |
|                  |                                   |                                      |                                                              |                                                                   |                     |                                      |                                                                     | 14             | 4                                                            | 3                                                            |
|                  |                                   |                                      |                                                              |                                                                   |                     |                                      |                                                                     | 15             | 5                                                            | 5                                                            |
|                  |                                   |                                      |                                                              |                                                                   |                     |                                      |                                                                     | 16             | 5                                                            | 5                                                            |
|                  |                                   |                                      |                                                              |                                                                   |                     |                                      |                                                                     | 17             | 5                                                            | 5                                                            |
|                  |                                   |                                      |                                                              |                                                                   |                     |                                      |                                                                     | 18             | 4                                                            | 4                                                            |
|                  |                                   |                                      |                                                              |                                                                   |                     |                                      |                                                                     | 19             | 4                                                            | 5                                                            |
| 30               | Physician / methodological expert | yes                                  | yes                                                          | < 10 guidelines                                                   | 1-5 years           | yes                                  | Research                                                            | 1              | 5                                                            | 5                                                            |
|                  |                                   |                                      |                                                              |                                                                   |                     |                                      |                                                                     | 2              | 5                                                            | 5                                                            |
|                  |                                   |                                      |                                                              |                                                                   |                     |                                      |                                                                     | 3              | 5                                                            | 5                                                            |



| No of respondent | Profession | Knowledge of the AGREE II instrument | Performance of appraisals using the AGREE I or II instrument | Number of appraised guidelines using the AGREE I or II instrument | Experience in years | Involvement in guideline development | Purpose of conducting appraisals using the AGREE I or II instrument | AGREE II Items | Assessment of the influence on <u>methodological quality</u> | Assessment of the influence on <u>recommendation for use</u> |
|------------------|------------|--------------------------------------|--------------------------------------------------------------|-------------------------------------------------------------------|---------------------|--------------------------------------|---------------------------------------------------------------------|----------------|--------------------------------------------------------------|--------------------------------------------------------------|
|                  |            |                                      |                                                              |                                                                   |                     |                                      |                                                                     | 4              | 3                                                            | 3                                                            |
|                  |            |                                      |                                                              |                                                                   |                     |                                      |                                                                     | 5              | 4                                                            | 4                                                            |
|                  |            |                                      |                                                              |                                                                   |                     |                                      |                                                                     | 6              | 4                                                            | 4                                                            |
|                  |            |                                      |                                                              |                                                                   |                     |                                      |                                                                     | 7              | 5                                                            | 5                                                            |
|                  |            |                                      |                                                              |                                                                   |                     |                                      |                                                                     | 8              | 5                                                            | 5                                                            |
|                  |            |                                      |                                                              |                                                                   |                     |                                      |                                                                     | 9              | 5                                                            | 5                                                            |
|                  |            |                                      |                                                              |                                                                   |                     |                                      |                                                                     | 10             | 5                                                            | 5                                                            |
|                  |            |                                      |                                                              |                                                                   |                     |                                      |                                                                     | 11             | 5                                                            | 5                                                            |
|                  |            |                                      |                                                              |                                                                   |                     |                                      |                                                                     | 12             | 5                                                            | 5                                                            |
|                  |            |                                      |                                                              |                                                                   |                     |                                      |                                                                     | 13             | 5                                                            | 5                                                            |
|                  |            |                                      |                                                              |                                                                   |                     |                                      |                                                                     | 14             | 5                                                            | 5                                                            |
|                  |            |                                      |                                                              |                                                                   |                     |                                      |                                                                     | 15             | 3                                                            | 3                                                            |
|                  |            |                                      |                                                              |                                                                   |                     |                                      |                                                                     | 16             | 3                                                            | 3                                                            |
|                  |            |                                      |                                                              |                                                                   |                     |                                      |                                                                     | 17             | 3                                                            | 3                                                            |
| 18               | 3          | 3                                    |                                                              |                                                                   |                     |                                      |                                                                     |                |                                                              |                                                              |
| 19               | 3          | 3                                    |                                                              |                                                                   |                     |                                      |                                                                     |                |                                                              |                                                              |
| 20               | 3          | 3                                    |                                                              |                                                                   |                     |                                      |                                                                     |                |                                                              |                                                              |
| 21               | 3          | 3                                    |                                                              |                                                                   |                     |                                      |                                                                     |                |                                                              |                                                              |
| 22               | 5          | 5                                    |                                                              |                                                                   |                     |                                      |                                                                     |                |                                                              |                                                              |
| 23               | 5          | 5                                    |                                                              |                                                                   |                     |                                      |                                                                     |                |                                                              |                                                              |
| 31               | Physician  | yes                                  | yes                                                          | < 10                                                              | 1-5 years           | no                                   | Research                                                            | 1              | 4                                                            | 4                                                            |

| No of respondent | Profession | Knowledge of the AGREE II instrument | Performance of appraisals using the AGREE I or II instrument | Number of appraised guidelines using the AGREE I or II instrument | Experience in years | Involvement in guideline development | Purpose of conducting appraisals using the AGREE I or II instrument | AGREE II Items | Assessment of the influence on <u>methodological quality</u> | Assessment of the influence on <u>recommendation for use</u> |
|------------------|------------|--------------------------------------|--------------------------------------------------------------|-------------------------------------------------------------------|---------------------|--------------------------------------|---------------------------------------------------------------------|----------------|--------------------------------------------------------------|--------------------------------------------------------------|
|                  |            |                                      |                                                              | guidelines                                                        |                     |                                      |                                                                     | 2              | 4                                                            | 4                                                            |
|                  |            |                                      |                                                              |                                                                   |                     |                                      |                                                                     | 3              | 4                                                            | 4                                                            |
|                  |            |                                      |                                                              |                                                                   |                     |                                      |                                                                     | 4              | 4                                                            | 4                                                            |
|                  |            |                                      |                                                              |                                                                   |                     |                                      |                                                                     | 5              | 4                                                            | 4                                                            |
|                  |            |                                      |                                                              |                                                                   |                     |                                      |                                                                     | 6              | 4                                                            | 4                                                            |
|                  |            |                                      |                                                              |                                                                   |                     |                                      |                                                                     | 7              | 4                                                            | 4                                                            |
|                  |            |                                      |                                                              |                                                                   |                     |                                      |                                                                     | 8              | 4                                                            | 4                                                            |
|                  |            |                                      |                                                              |                                                                   |                     |                                      |                                                                     | 9              | 3                                                            | 3                                                            |
|                  |            |                                      |                                                              |                                                                   |                     |                                      |                                                                     | 10             | 4                                                            | 3                                                            |
|                  |            |                                      |                                                              |                                                                   |                     |                                      |                                                                     | 11             | 3                                                            | 4                                                            |
|                  |            |                                      |                                                              |                                                                   |                     |                                      |                                                                     | 12             | 3                                                            | 4                                                            |
|                  |            |                                      |                                                              |                                                                   |                     |                                      |                                                                     | 13             | 3                                                            | 4                                                            |
|                  |            |                                      |                                                              |                                                                   |                     |                                      |                                                                     | 14             | 4                                                            | 3                                                            |
|                  |            |                                      |                                                              |                                                                   |                     |                                      |                                                                     | 15             | 5                                                            | 5                                                            |
|                  |            |                                      |                                                              |                                                                   |                     |                                      |                                                                     | 16             | 5                                                            | 5                                                            |
|                  |            |                                      |                                                              |                                                                   |                     |                                      |                                                                     | 17             | 5                                                            | 5                                                            |
|                  |            |                                      |                                                              |                                                                   |                     |                                      |                                                                     | 18             | 3                                                            | 4                                                            |
|                  |            |                                      |                                                              |                                                                   |                     |                                      |                                                                     | 19             | 4                                                            | 4                                                            |
|                  |            |                                      |                                                              |                                                                   |                     |                                      |                                                                     | 20             | 3                                                            | 3                                                            |
|                  |            |                                      |                                                              |                                                                   |                     |                                      |                                                                     | 21             | 3                                                            | 3                                                            |
|                  |            |                                      |                                                              |                                                                   |                     |                                      |                                                                     | 22             | 5                                                            | 5                                                            |

| No of respondent | Profession | Knowledge of the AGREE II instrument | Performance of appraisals using the AGREE I or II instrument | Number of appraised guidelines using the AGREE I or II instrument | Experience in years | Involvement in guideline development | Purpose of conducting appraisals using the AGREE I or II instrument | AGREE II Items | Assessment of the influence on <u>methodological quality</u> | Assessment of the influence on <u>recommendation for use</u> |
|------------------|------------|--------------------------------------|--------------------------------------------------------------|-------------------------------------------------------------------|---------------------|--------------------------------------|---------------------------------------------------------------------|----------------|--------------------------------------------------------------|--------------------------------------------------------------|
|                  |            |                                      |                                                              |                                                                   |                     |                                      |                                                                     | 23             | 5                                                            | 5                                                            |
| 32               | Physician  | yes                                  | yes                                                          | < 10 guidelines                                                   | 1-5 years           | yes                                  | Assessment of guideline quality, Development of guidelines          | 1              | 5                                                            | 5                                                            |
|                  |            |                                      |                                                              |                                                                   |                     |                                      |                                                                     | 2              | 5                                                            | 5                                                            |
|                  |            |                                      |                                                              |                                                                   |                     |                                      |                                                                     | 3              | 5                                                            | 5                                                            |
|                  |            |                                      |                                                              |                                                                   |                     |                                      |                                                                     | 4              | 5                                                            | 5                                                            |
|                  |            |                                      |                                                              |                                                                   |                     |                                      |                                                                     | 5              | 4                                                            | 4                                                            |
|                  |            |                                      |                                                              |                                                                   |                     |                                      |                                                                     | 6              | 5                                                            | 5                                                            |
|                  |            |                                      |                                                              |                                                                   |                     |                                      |                                                                     | 7              | 5                                                            | 5                                                            |
|                  |            |                                      |                                                              |                                                                   |                     |                                      |                                                                     | 8              | 5                                                            | 5                                                            |
|                  |            |                                      |                                                              |                                                                   |                     |                                      |                                                                     | 9              | 5                                                            | 5                                                            |
|                  |            |                                      |                                                              |                                                                   |                     |                                      |                                                                     | 10             | 5                                                            | 5                                                            |
|                  |            |                                      |                                                              |                                                                   |                     |                                      |                                                                     | 11             | 4                                                            | 5                                                            |
|                  |            |                                      |                                                              |                                                                   |                     |                                      |                                                                     | 12             | 4                                                            | 4                                                            |
|                  |            |                                      |                                                              |                                                                   |                     |                                      |                                                                     | 13             | 3                                                            | 3                                                            |
| 14               | 5          | 5                                    |                                                              |                                                                   |                     |                                      |                                                                     |                |                                                              |                                                              |
| 15               | 5          | 5                                    |                                                              |                                                                   |                     |                                      |                                                                     |                |                                                              |                                                              |
| 16               | 4          | 5                                    |                                                              |                                                                   |                     |                                      |                                                                     |                |                                                              |                                                              |
| 17               | 5          | 5                                    |                                                              |                                                                   |                     |                                      |                                                                     |                |                                                              |                                                              |
| 18               | 4          | 4                                    |                                                              |                                                                   |                     |                                      |                                                                     |                |                                                              |                                                              |
| 19               | 4          | 4                                    |                                                              |                                                                   |                     |                                      |                                                                     |                |                                                              |                                                              |
| 20               | 4          | 4                                    |                                                              |                                                                   |                     |                                      |                                                                     |                |                                                              |                                                              |

| No of respondent | Profession | Knowledge of the AGREE II instrument | Performance of appraisals using the AGREE I or II instrument | Number of appraised guidelines using the AGREE I or II instrument | Experience in years | Involvement in guideline development | Purpose of conducting appraisals using the AGREE I or II instrument | AGREE II Items | Assessment of the influence on <u>methodological quality</u> | Assessment of the influence on <u>recommendation for use</u> |
|------------------|------------|--------------------------------------|--------------------------------------------------------------|-------------------------------------------------------------------|---------------------|--------------------------------------|---------------------------------------------------------------------|----------------|--------------------------------------------------------------|--------------------------------------------------------------|
|                  |            |                                      |                                                              |                                                                   |                     |                                      |                                                                     | 21             | 4                                                            | 4                                                            |
|                  |            |                                      |                                                              |                                                                   |                     |                                      |                                                                     | 22             | 5                                                            | 5                                                            |
|                  |            |                                      |                                                              |                                                                   |                     |                                      |                                                                     | 23             | 5                                                            | 5                                                            |
| 33               | Physician  | yes                                  | yes                                                          | < 10 guidelines                                                   | 1-5 years           | yes                                  | Application in clinical practice                                    | 1              | 4                                                            | 5                                                            |
|                  |            |                                      |                                                              |                                                                   |                     |                                      |                                                                     | 2              | 5                                                            | 5                                                            |
|                  |            |                                      |                                                              |                                                                   |                     |                                      |                                                                     | 3              | 5                                                            | 5                                                            |
|                  |            |                                      |                                                              |                                                                   |                     |                                      |                                                                     | 4              | 3                                                            | 1                                                            |
|                  |            |                                      |                                                              |                                                                   |                     |                                      |                                                                     | 5              | 3                                                            | 1                                                            |
|                  |            |                                      |                                                              |                                                                   |                     |                                      |                                                                     | 6              | 4                                                            | 3                                                            |
|                  |            |                                      |                                                              |                                                                   |                     |                                      |                                                                     | 7              | 5                                                            | 5                                                            |
|                  |            |                                      |                                                              |                                                                   |                     |                                      |                                                                     | 8              | 5                                                            | 5                                                            |
|                  |            |                                      |                                                              |                                                                   |                     |                                      |                                                                     | 9              | 4                                                            | 4                                                            |
|                  |            |                                      |                                                              |                                                                   |                     |                                      |                                                                     | 10             | 4                                                            | 4                                                            |
|                  |            |                                      |                                                              |                                                                   |                     |                                      |                                                                     | 11             | 2                                                            | 4                                                            |
|                  |            |                                      |                                                              |                                                                   |                     |                                      |                                                                     | 12             | 4                                                            | 4                                                            |
|                  |            |                                      |                                                              |                                                                   |                     |                                      |                                                                     | 13             | 5                                                            | 1                                                            |
|                  |            |                                      |                                                              |                                                                   |                     |                                      |                                                                     | 14             | 3                                                            | 0                                                            |
| 15               | 4          | 5                                    |                                                              |                                                                   |                     |                                      |                                                                     |                |                                                              |                                                              |
| 16               | 1          | 4                                    |                                                              |                                                                   |                     |                                      |                                                                     |                |                                                              |                                                              |
| 17               | 1          | 5                                    |                                                              |                                                                   |                     |                                      |                                                                     |                |                                                              |                                                              |
| 18               | 1          | 3                                    |                                                              |                                                                   |                     |                                      |                                                                     |                |                                                              |                                                              |

| No of respondent | Profession | Knowledge of the AGREE II instrument | Performance of appraisals using the AGREE I or II instrument | Number of appraised guidelines using the AGREE I or II instrument | Experience in years | Involvement in guideline development | Purpose of conducting appraisals using the AGREE I or II instrument | AGREE II Items | Assessment of the influence on <u>methodological quality</u> | Assessment of the influence on <u>recommendation for use</u> |
|------------------|------------|--------------------------------------|--------------------------------------------------------------|-------------------------------------------------------------------|---------------------|--------------------------------------|---------------------------------------------------------------------|----------------|--------------------------------------------------------------|--------------------------------------------------------------|
|                  |            |                                      |                                                              |                                                                   |                     |                                      |                                                                     | 19             | 1                                                            | 3                                                            |
|                  |            |                                      |                                                              |                                                                   |                     |                                      |                                                                     | 20             | 1                                                            | 3                                                            |
|                  |            |                                      |                                                              |                                                                   |                     |                                      |                                                                     | 21             | 1                                                            | 3                                                            |
|                  |            |                                      |                                                              |                                                                   |                     |                                      |                                                                     | 22             | 5                                                            | 3                                                            |
|                  |            |                                      |                                                              |                                                                   |                     |                                      |                                                                     | 23             | 5                                                            | 5                                                            |
| 34               | other      | yes                                  | yes                                                          | < 10 guidelines                                                   | 1-5 years           | yes                                  | Development of guidelines                                           | 1              | 5                                                            | 5                                                            |
|                  |            |                                      |                                                              |                                                                   |                     |                                      |                                                                     | 2              | 5                                                            | 5                                                            |
|                  |            |                                      |                                                              |                                                                   |                     |                                      |                                                                     | 3              | 5                                                            | 5                                                            |
|                  |            |                                      |                                                              |                                                                   |                     |                                      |                                                                     | 4              | 5                                                            | 5                                                            |
|                  |            |                                      |                                                              |                                                                   |                     |                                      |                                                                     | 5              | 4                                                            | 4                                                            |
|                  |            |                                      |                                                              |                                                                   |                     |                                      |                                                                     | 6              | 5                                                            | 5                                                            |
|                  |            |                                      |                                                              |                                                                   |                     |                                      |                                                                     | 7              | 5                                                            | 5                                                            |
|                  |            |                                      |                                                              |                                                                   |                     |                                      |                                                                     | 8              | 5                                                            | 5                                                            |
|                  |            |                                      |                                                              |                                                                   |                     |                                      |                                                                     | 9              | 5                                                            | 5                                                            |
|                  |            |                                      |                                                              |                                                                   |                     |                                      |                                                                     | 10             | 5                                                            | 5                                                            |
|                  |            |                                      |                                                              |                                                                   |                     |                                      |                                                                     | 11             | 5                                                            | 5                                                            |
|                  |            |                                      |                                                              |                                                                   |                     |                                      |                                                                     | 12             | 5                                                            | 5                                                            |
|                  |            |                                      |                                                              |                                                                   |                     |                                      |                                                                     | 13             | 5                                                            | 5                                                            |
|                  |            |                                      |                                                              |                                                                   |                     |                                      |                                                                     | 14             | 4                                                            | 4                                                            |
|                  |            |                                      |                                                              |                                                                   |                     |                                      |                                                                     | 15             | 4                                                            | 4                                                            |
|                  |            |                                      |                                                              |                                                                   |                     |                                      |                                                                     | 16             | 4                                                            | 4                                                            |

| No of respondent | Profession | Knowledge of the AGREE II instrument | Performance of appraisals using the AGREE I or II instrument | Number of appraised guidelines using the AGREE I or II instrument | Experience in years | Involvement in guideline development | Purpose of conducting appraisals using the AGREE I or II instrument | AGREE II Items | Assessment of the influence on <u>methodological quality</u> | Assessment of the influence on <u>recommendation for use</u> |
|------------------|------------|--------------------------------------|--------------------------------------------------------------|-------------------------------------------------------------------|---------------------|--------------------------------------|---------------------------------------------------------------------|----------------|--------------------------------------------------------------|--------------------------------------------------------------|
|                  |            |                                      |                                                              |                                                                   |                     |                                      |                                                                     | 17             | 5                                                            | 5                                                            |
|                  |            |                                      |                                                              |                                                                   |                     |                                      |                                                                     | 18             | 3                                                            | 4                                                            |
|                  |            |                                      |                                                              |                                                                   |                     |                                      |                                                                     | 19             | 3                                                            | 4                                                            |
|                  |            |                                      |                                                              |                                                                   |                     |                                      |                                                                     | 20             | 3                                                            | 4                                                            |
|                  |            |                                      |                                                              |                                                                   |                     |                                      |                                                                     | 21             | 4                                                            | 4                                                            |
|                  |            |                                      |                                                              |                                                                   |                     |                                      |                                                                     | 22             | 5                                                            | 5                                                            |
|                  |            |                                      |                                                              |                                                                   |                     |                                      |                                                                     | 23             | 5                                                            | 5                                                            |
| 35               | Physician  | yes                                  | yes                                                          | > 20 guidelines                                                   | 1-5 years           | no                                   | Assessment of guideline quality                                     | 1              | 4                                                            | 3                                                            |
|                  |            |                                      |                                                              |                                                                   |                     |                                      |                                                                     | 2              | 4                                                            | 4                                                            |
|                  |            |                                      |                                                              |                                                                   |                     |                                      |                                                                     | 3              | 4                                                            | 4                                                            |
|                  |            |                                      |                                                              |                                                                   |                     |                                      |                                                                     | 4              | 4                                                            | 4                                                            |
|                  |            |                                      |                                                              |                                                                   |                     |                                      |                                                                     | 5              | 4                                                            | 3                                                            |
|                  |            |                                      |                                                              |                                                                   |                     |                                      |                                                                     | 6              | 4                                                            | 4                                                            |
|                  |            |                                      |                                                              |                                                                   |                     |                                      |                                                                     | 7              | 4                                                            | 4                                                            |
|                  |            |                                      |                                                              |                                                                   |                     |                                      |                                                                     | 8              | 4                                                            | 4                                                            |
|                  |            |                                      |                                                              |                                                                   |                     |                                      |                                                                     | 9              | 4                                                            | 4                                                            |
|                  |            |                                      |                                                              |                                                                   |                     |                                      |                                                                     | 10             | 4                                                            | 4                                                            |
|                  |            |                                      |                                                              |                                                                   |                     |                                      |                                                                     | 11             | 5                                                            | 5                                                            |
|                  |            |                                      |                                                              |                                                                   |                     |                                      |                                                                     | 12             | 5                                                            | 5                                                            |
|                  |            |                                      |                                                              |                                                                   |                     |                                      |                                                                     | 13             | 5                                                            | 5                                                            |
|                  |            |                                      |                                                              |                                                                   |                     |                                      |                                                                     | 14             | 4                                                            | 4                                                            |

| No of respondent | Profession | Knowledge of the AGREE II instrument | Performance of appraisals using the AGREE I or II instrument | Number of appraised guidelines using the AGREE I or II instrument | Experience in years | Involvement in guideline development | Purpose of conducting appraisals using the AGREE I or II instrument | AGREE II Items | Assessment of the influence on <u>methodological quality</u> | Assessment of the influence on <u>recommendation for use</u> |
|------------------|------------|--------------------------------------|--------------------------------------------------------------|-------------------------------------------------------------------|---------------------|--------------------------------------|---------------------------------------------------------------------|----------------|--------------------------------------------------------------|--------------------------------------------------------------|
|                  |            |                                      |                                                              |                                                                   |                     |                                      |                                                                     | 15             | 5                                                            | 5                                                            |
|                  |            |                                      |                                                              |                                                                   |                     |                                      |                                                                     | 16             | 4                                                            | 4                                                            |
|                  |            |                                      |                                                              |                                                                   |                     |                                      |                                                                     | 17             | 5                                                            | 5                                                            |
|                  |            |                                      |                                                              |                                                                   |                     |                                      |                                                                     | 18             | 5                                                            | 5                                                            |
|                  |            |                                      |                                                              |                                                                   |                     |                                      |                                                                     | 19             | 5                                                            | 5                                                            |
|                  |            |                                      |                                                              |                                                                   |                     |                                      |                                                                     | 20             | 5                                                            | 5                                                            |
|                  |            |                                      |                                                              |                                                                   |                     |                                      |                                                                     | 21             | 5                                                            | 5                                                            |
|                  |            |                                      |                                                              |                                                                   |                     |                                      |                                                                     | 22             | 5                                                            | 5                                                            |
|                  |            |                                      |                                                              |                                                                   |                     |                                      |                                                                     | 23             | 5                                                            | 5                                                            |
| 36               | other      | yes                                  | yes                                                          | > 20 guidelines                                                   | 1-5 years           | no                                   | Assessment of guideline quality                                     | 1              | 4                                                            | 3                                                            |
|                  |            |                                      |                                                              |                                                                   |                     |                                      |                                                                     | 2              | 3                                                            | 4                                                            |
|                  |            |                                      |                                                              |                                                                   |                     |                                      |                                                                     | 3              | 2                                                            | 4                                                            |
|                  |            |                                      |                                                              |                                                                   |                     |                                      |                                                                     | 4              | 2                                                            | 3                                                            |
|                  |            |                                      |                                                              |                                                                   |                     |                                      |                                                                     | 5              | 2                                                            | 3                                                            |
|                  |            |                                      |                                                              |                                                                   |                     |                                      |                                                                     | 6              | 4                                                            | 4                                                            |
|                  |            |                                      |                                                              |                                                                   |                     |                                      |                                                                     | 7              | 5                                                            | 5                                                            |
|                  |            |                                      |                                                              |                                                                   |                     |                                      |                                                                     | 8              | 5                                                            | 4                                                            |
|                  |            |                                      |                                                              |                                                                   |                     |                                      |                                                                     | 9              | 4                                                            | 5                                                            |
|                  |            |                                      |                                                              |                                                                   |                     |                                      |                                                                     | 10             | 5                                                            | 5                                                            |
|                  |            |                                      |                                                              |                                                                   |                     |                                      |                                                                     | 11             | 4                                                            | 5                                                            |
|                  |            |                                      |                                                              |                                                                   |                     |                                      |                                                                     | 12             | 4                                                            | 5                                                            |

| No of respondent | Profession | Knowledge of the AGREE II instrument | Performance of appraisals using the AGREE I or II instrument | Number of appraised guidelines using the AGREE I or II instrument | Experience in years | Involvement in guideline development | Purpose of conducting appraisals using the AGREE I or II instrument | AGREE II Items | Assessment of the influence on <u>methodological quality</u> | Assessment of the influence on <u>recommendation for use</u> |
|------------------|------------|--------------------------------------|--------------------------------------------------------------|-------------------------------------------------------------------|---------------------|--------------------------------------|---------------------------------------------------------------------|----------------|--------------------------------------------------------------|--------------------------------------------------------------|
|                  |            |                                      |                                                              |                                                                   |                     |                                      |                                                                     | 13             | 5                                                            | 5                                                            |
|                  |            |                                      |                                                              |                                                                   |                     |                                      |                                                                     | 14             | 3                                                            | 5                                                            |
|                  |            |                                      |                                                              |                                                                   |                     |                                      |                                                                     | 15             | 4                                                            | 5                                                            |
|                  |            |                                      |                                                              |                                                                   |                     |                                      |                                                                     | 16             | 4                                                            | 5                                                            |
|                  |            |                                      |                                                              |                                                                   |                     |                                      |                                                                     | 17             | 3                                                            | 5                                                            |
|                  |            |                                      |                                                              |                                                                   |                     |                                      |                                                                     | 18             | 3                                                            | 4                                                            |
|                  |            |                                      |                                                              |                                                                   |                     |                                      |                                                                     | 19             | 4                                                            | 5                                                            |
|                  |            |                                      |                                                              |                                                                   |                     |                                      |                                                                     | 20             | 3                                                            | 4                                                            |
|                  |            |                                      |                                                              |                                                                   |                     |                                      |                                                                     | 21             | 4                                                            | 4                                                            |
|                  |            |                                      |                                                              |                                                                   |                     |                                      |                                                                     | 22             | 4                                                            | 4                                                            |
|                  |            |                                      |                                                              |                                                                   |                     |                                      |                                                                     | 23             | 5                                                            | 4                                                            |
| 37               | Physician  | yes                                  | yes                                                          | > 20 guidelines                                                   | 1-5 years           | no                                   | Writing of guideline synopses                                       | 1              | 3                                                            | 3                                                            |
|                  |            |                                      |                                                              |                                                                   |                     |                                      |                                                                     | 2              | 2                                                            | 2                                                            |
|                  |            |                                      |                                                              |                                                                   |                     |                                      |                                                                     | 3              | 3                                                            | 3                                                            |
|                  |            |                                      |                                                              |                                                                   |                     |                                      |                                                                     | 4              | 4                                                            | 4                                                            |
|                  |            |                                      |                                                              |                                                                   |                     |                                      |                                                                     | 5              | 4                                                            | 4                                                            |
|                  |            |                                      |                                                              |                                                                   |                     |                                      |                                                                     | 6              | 3                                                            | 3                                                            |
|                  |            |                                      |                                                              |                                                                   |                     |                                      |                                                                     | 7              | 5                                                            | 5                                                            |
|                  |            |                                      |                                                              |                                                                   |                     |                                      |                                                                     | 8              | 5                                                            | 5                                                            |
|                  |            |                                      |                                                              |                                                                   |                     |                                      |                                                                     | 9              | 4                                                            | 4                                                            |
|                  |            |                                      |                                                              |                                                                   |                     |                                      |                                                                     | 10             | 5                                                            | 5                                                            |



| No of respondent | Profession | Knowledge of the AGREE II instrument | Performance of appraisals using the AGREE I or II instrument | Number of appraised guidelines using the AGREE I or II instrument | Experience in years | Involvement in guideline development | Purpose of conducting appraisals using the AGREE I or II instrument | AGREE II Items | Assessment of the influence on <u>methodological quality</u> | Assessment of the influence on <u>recommendation for use</u> |
|------------------|------------|--------------------------------------|--------------------------------------------------------------|-------------------------------------------------------------------|---------------------|--------------------------------------|---------------------------------------------------------------------|----------------|--------------------------------------------------------------|--------------------------------------------------------------|
|                  |            |                                      |                                                              |                                                                   |                     |                                      |                                                                     | 11             | 5                                                            | 5                                                            |
|                  |            |                                      |                                                              |                                                                   |                     |                                      |                                                                     | 12             | 5                                                            | 5                                                            |
|                  |            |                                      |                                                              |                                                                   |                     |                                      |                                                                     | 13             | 4                                                            | 4                                                            |
|                  |            |                                      |                                                              |                                                                   |                     |                                      |                                                                     | 14             | 3                                                            | 3                                                            |
|                  |            |                                      |                                                              |                                                                   |                     |                                      |                                                                     | 15             | 4                                                            | 4                                                            |
|                  |            |                                      |                                                              |                                                                   |                     |                                      |                                                                     | 16             | 4                                                            | 4                                                            |
|                  |            |                                      |                                                              |                                                                   |                     |                                      |                                                                     | 17             | 3                                                            | 3                                                            |
|                  |            |                                      |                                                              |                                                                   |                     |                                      |                                                                     | 18             | 2                                                            | 2                                                            |
|                  |            |                                      |                                                              |                                                                   |                     |                                      |                                                                     | 19             | 1                                                            | 1                                                            |
|                  |            |                                      |                                                              |                                                                   |                     |                                      |                                                                     | 20             | 1                                                            | 1                                                            |
|                  |            |                                      |                                                              |                                                                   |                     |                                      |                                                                     | 21             | 0                                                            | 0                                                            |
|                  |            |                                      |                                                              |                                                                   |                     |                                      |                                                                     | 22             | 4                                                            | 4                                                            |
|                  |            |                                      |                                                              |                                                                   |                     |                                      |                                                                     | 23             | 4                                                            | 4                                                            |
| 38               | other      | yes                                  | yes                                                          | < 10 guidelines                                                   | 1-5 years           | yes                                  | Assessment of guideline quality, Development of knowledge tools     | 1              | 2                                                            | 5                                                            |
|                  |            |                                      |                                                              |                                                                   |                     |                                      |                                                                     | 2              | 2                                                            | 5                                                            |
|                  |            |                                      |                                                              |                                                                   |                     |                                      |                                                                     | 3              | 4                                                            | 5                                                            |
|                  |            |                                      |                                                              |                                                                   |                     |                                      |                                                                     | 4              | 4                                                            | 4                                                            |
|                  |            |                                      |                                                              |                                                                   |                     |                                      |                                                                     | 5              | 4                                                            | 4                                                            |
|                  |            |                                      |                                                              |                                                                   |                     |                                      |                                                                     | 6              | 4                                                            | 4                                                            |
|                  |            |                                      |                                                              |                                                                   |                     |                                      |                                                                     | 7              | 5                                                            | 5                                                            |
|                  |            |                                      |                                                              |                                                                   |                     |                                      |                                                                     | 8              | 5                                                            | 5                                                            |

| No of respondent | Profession            | Knowledge of the AGREE II instrument | Performance of appraisals using the AGREE I or II instrument | Number of appraised guidelines using the AGREE I or II instrument | Experience in years | Involvement in guideline development | Purpose of conducting appraisals using the AGREE I or II instrument | AGREE II Items | Assessment of the influence on <u>methodological quality</u> | Assessment of the influence on <u>recommendation for use</u> |
|------------------|-----------------------|--------------------------------------|--------------------------------------------------------------|-------------------------------------------------------------------|---------------------|--------------------------------------|---------------------------------------------------------------------|----------------|--------------------------------------------------------------|--------------------------------------------------------------|
|                  |                       |                                      |                                                              |                                                                   |                     |                                      |                                                                     | 9              | 5                                                            | 5                                                            |
|                  |                       |                                      |                                                              |                                                                   |                     |                                      |                                                                     | 10             | 5                                                            | 5                                                            |
|                  |                       |                                      |                                                              |                                                                   |                     |                                      |                                                                     | 11             | 4                                                            | 4                                                            |
|                  |                       |                                      |                                                              |                                                                   |                     |                                      |                                                                     | 12             | 5                                                            | 5                                                            |
|                  |                       |                                      |                                                              |                                                                   |                     |                                      |                                                                     | 13             | 5                                                            | 5                                                            |
|                  |                       |                                      |                                                              |                                                                   |                     |                                      |                                                                     | 14             | 4                                                            | 4                                                            |
|                  |                       |                                      |                                                              |                                                                   |                     |                                      |                                                                     | 15             | 4                                                            | 4                                                            |
|                  |                       |                                      |                                                              |                                                                   |                     |                                      |                                                                     | 16             | 5                                                            | 5                                                            |
|                  |                       |                                      |                                                              |                                                                   |                     |                                      |                                                                     | 17             | 4                                                            | 4                                                            |
|                  |                       |                                      |                                                              |                                                                   |                     |                                      |                                                                     | 18             | 3                                                            | 3                                                            |
|                  |                       |                                      |                                                              |                                                                   |                     |                                      |                                                                     | 19             | 5                                                            | 5                                                            |
|                  |                       |                                      |                                                              |                                                                   |                     |                                      |                                                                     | 20             | 4                                                            | 4                                                            |
|                  |                       |                                      |                                                              |                                                                   |                     |                                      |                                                                     | 21             | 4                                                            | 4                                                            |
| 39               | methodological expert | yes                                  | yes                                                          | 10-20 guidelines                                                  | > 5 years           | yes                                  | further training                                                    | 1              | 2                                                            | 3                                                            |
|                  |                       |                                      |                                                              |                                                                   |                     |                                      |                                                                     | 2              | 4                                                            | 3                                                            |
|                  |                       |                                      |                                                              |                                                                   |                     |                                      |                                                                     | 3              | 4                                                            | 4                                                            |
|                  |                       |                                      |                                                              |                                                                   |                     |                                      |                                                                     | 4              | 4                                                            | 4                                                            |
|                  |                       |                                      |                                                              |                                                                   |                     |                                      |                                                                     | 5              | 4                                                            | 3                                                            |
|                  |                       |                                      |                                                              |                                                                   |                     |                                      |                                                                     | 6              | 3                                                            | 2                                                            |

| No of respondent | Profession | Knowledge of the AGREE II instrument | Performance of appraisals using the AGREE I or II instrument | Number of appraised guidelines using the AGREE I or II instrument | Experience in years | Involvement in guideline development | Purpose of conducting appraisals using the AGREE I or II instrument | AGREE II Items | Assessment of the influence on <u>methodological quality</u> | Assessment of the influence on <u>recommendation for use</u> |
|------------------|------------|--------------------------------------|--------------------------------------------------------------|-------------------------------------------------------------------|---------------------|--------------------------------------|---------------------------------------------------------------------|----------------|--------------------------------------------------------------|--------------------------------------------------------------|
|                  |            |                                      |                                                              |                                                                   |                     |                                      |                                                                     | 7              | 5                                                            | 5                                                            |
|                  |            |                                      |                                                              |                                                                   |                     |                                      |                                                                     | 8              | 3                                                            | 2                                                            |
|                  |            |                                      |                                                              |                                                                   |                     |                                      |                                                                     | 9              | 5                                                            | 5                                                            |
|                  |            |                                      |                                                              |                                                                   |                     |                                      |                                                                     | 10             | 5                                                            | 5                                                            |
|                  |            |                                      |                                                              |                                                                   |                     |                                      |                                                                     | 11             | 5                                                            | 5                                                            |
|                  |            |                                      |                                                              |                                                                   |                     |                                      |                                                                     | 12             | 4                                                            | 4                                                            |
|                  |            |                                      |                                                              |                                                                   |                     |                                      |                                                                     | 13             | 4                                                            | 2                                                            |
|                  |            |                                      |                                                              |                                                                   |                     |                                      |                                                                     | 14             | 3                                                            | 1                                                            |
|                  |            |                                      |                                                              |                                                                   |                     |                                      |                                                                     | 15             | 4                                                            | 4                                                            |
|                  |            |                                      |                                                              |                                                                   |                     |                                      |                                                                     | 16             | 3                                                            | 5                                                            |
|                  |            |                                      |                                                              |                                                                   |                     |                                      |                                                                     | 17             | 4                                                            | 5                                                            |
|                  |            |                                      |                                                              |                                                                   |                     |                                      |                                                                     | 18             | 4                                                            | 4                                                            |
|                  |            |                                      |                                                              |                                                                   |                     |                                      |                                                                     | 19             | 3                                                            | 4                                                            |
|                  |            |                                      |                                                              |                                                                   |                     |                                      |                                                                     | 20             | 4                                                            | 4                                                            |
| 21               | 3          | 3                                    |                                                              |                                                                   |                     |                                      |                                                                     |                |                                                              |                                                              |
| 22               | 3          | 2                                    |                                                              |                                                                   |                     |                                      |                                                                     |                |                                                              |                                                              |
| 23               | 5          | 5                                    |                                                              |                                                                   |                     |                                      |                                                                     |                |                                                              |                                                              |
| 40               | Physician  | yes                                  | yes                                                          | < 10 guidelines                                                   | < 1 year            | no                                   | Assessment of guideline quality                                     | 1              | 5                                                            | 5                                                            |
|                  |            |                                      |                                                              |                                                                   |                     |                                      |                                                                     | 2              | 3                                                            | 5                                                            |
|                  |            |                                      |                                                              |                                                                   |                     |                                      |                                                                     | 3              | 4                                                            | 5                                                            |
|                  |            |                                      |                                                              |                                                                   |                     |                                      |                                                                     | 4              | 5                                                            | 5                                                            |

| No of respondent | Profession | Knowledge of the AGREE II instrument | Performance of appraisals using the AGREE I or II instrument | Number of appraised guidelines using the AGREE I or II instrument | Experience in years | Involvement in guideline development | Purpose of conducting appraisals using the AGREE I or II instrument | AGREE II Items | Assessment of the influence on <u>methodological quality</u> | Assessment of the influence on <u>recommendation for use</u> |
|------------------|------------|--------------------------------------|--------------------------------------------------------------|-------------------------------------------------------------------|---------------------|--------------------------------------|---------------------------------------------------------------------|----------------|--------------------------------------------------------------|--------------------------------------------------------------|
|                  |            |                                      |                                                              |                                                                   |                     |                                      |                                                                     | 5              | 3                                                            | 5                                                            |
|                  |            |                                      |                                                              |                                                                   |                     |                                      |                                                                     | 6              | 4                                                            | 5                                                            |
|                  |            |                                      |                                                              |                                                                   |                     |                                      |                                                                     | 7              | 5                                                            | 5                                                            |
|                  |            |                                      |                                                              |                                                                   |                     |                                      |                                                                     | 8              | 5                                                            | 5                                                            |
|                  |            |                                      |                                                              |                                                                   |                     |                                      |                                                                     | 9              | 5                                                            | 4                                                            |
|                  |            |                                      |                                                              |                                                                   |                     |                                      |                                                                     | 10             | 5                                                            | 3                                                            |
|                  |            |                                      |                                                              |                                                                   |                     |                                      |                                                                     | 11             | 5                                                            | 5                                                            |
|                  |            |                                      |                                                              |                                                                   |                     |                                      |                                                                     | 12             | 5                                                            | 5                                                            |
|                  |            |                                      |                                                              |                                                                   |                     |                                      |                                                                     | 13             | 5                                                            | 3                                                            |
|                  |            |                                      |                                                              |                                                                   |                     |                                      |                                                                     | 14             | 4                                                            | 4                                                            |
|                  |            |                                      |                                                              |                                                                   |                     |                                      |                                                                     | 15             | 2                                                            | 2                                                            |
|                  |            |                                      |                                                              |                                                                   |                     |                                      |                                                                     | 16             | 4                                                            | 5                                                            |
|                  |            |                                      |                                                              |                                                                   |                     |                                      |                                                                     | 17             | 5                                                            | 5                                                            |
|                  |            |                                      |                                                              |                                                                   |                     |                                      |                                                                     | 18             | 1                                                            | 3                                                            |
|                  |            |                                      |                                                              |                                                                   |                     |                                      |                                                                     | 19             | 2                                                            | 3                                                            |
|                  |            |                                      |                                                              |                                                                   |                     |                                      |                                                                     | 20             | 4                                                            | 5                                                            |
|                  |            |                                      |                                                              |                                                                   |                     |                                      |                                                                     | 21             | 1                                                            | 4                                                            |
|                  |            |                                      |                                                              |                                                                   |                     |                                      |                                                                     | 22             | 5                                                            | 5                                                            |
|                  |            |                                      |                                                              |                                                                   |                     |                                      |                                                                     | 23             | 5                                                            | 5                                                            |
| 41               | other      | yes                                  | yes                                                          | < 10 guidelines                                                   | 1-5 years           | no                                   | Assessment of guideline                                             | 1              | 3                                                            | 3                                                            |
|                  |            |                                      |                                                              |                                                                   |                     |                                      |                                                                     | 2              | 3                                                            | 3                                                            |

| No of respondent | Profession | Knowledge of the AGREE II instrument | Performance of appraisals using the AGREE I or II instrument | Number of appraised guidelines using the AGREE I or II instrument | Experience in years | Involvement in guideline development | Purpose of conducting appraisals using the AGREE I or II instrument | AGREE II Items | Assessment of the influence on <u>methodological quality</u> | Assessment of the influence on <u>recommendation for use</u> |
|------------------|------------|--------------------------------------|--------------------------------------------------------------|-------------------------------------------------------------------|---------------------|--------------------------------------|---------------------------------------------------------------------|----------------|--------------------------------------------------------------|--------------------------------------------------------------|
|                  |            |                                      |                                                              |                                                                   |                     |                                      | quality                                                             | 3              | 3                                                            | 3                                                            |
|                  |            |                                      |                                                              |                                                                   |                     |                                      |                                                                     | 4              | 4                                                            | 3                                                            |
|                  |            |                                      |                                                              |                                                                   |                     |                                      |                                                                     | 5              | 4                                                            | 3                                                            |
|                  |            |                                      |                                                              |                                                                   |                     |                                      |                                                                     | 6              | 4                                                            | 2                                                            |
|                  |            |                                      |                                                              |                                                                   |                     |                                      |                                                                     | 7              | 5                                                            | 5                                                            |
|                  |            |                                      |                                                              |                                                                   |                     |                                      |                                                                     | 8              | 5                                                            | 5                                                            |
|                  |            |                                      |                                                              |                                                                   |                     |                                      |                                                                     | 9              | 5                                                            | 4                                                            |
|                  |            |                                      |                                                              |                                                                   |                     |                                      |                                                                     | 10             | 5                                                            | 4                                                            |
|                  |            |                                      |                                                              |                                                                   |                     |                                      |                                                                     | 11             | 5                                                            | 5                                                            |
|                  |            |                                      |                                                              |                                                                   |                     |                                      |                                                                     | 12             | 5                                                            | 5                                                            |
|                  |            |                                      |                                                              |                                                                   |                     |                                      |                                                                     | 13             | 5                                                            | 5                                                            |
|                  |            |                                      |                                                              |                                                                   |                     |                                      |                                                                     | 14             | 4                                                            | 3                                                            |
|                  |            |                                      |                                                              |                                                                   |                     |                                      |                                                                     | 15             | 5                                                            | 5                                                            |
|                  |            |                                      |                                                              |                                                                   |                     |                                      |                                                                     | 16             | 5                                                            | 5                                                            |
|                  |            |                                      |                                                              |                                                                   |                     |                                      |                                                                     | 17             | 5                                                            | 5                                                            |
|                  |            |                                      |                                                              |                                                                   |                     |                                      |                                                                     | 18             | 5                                                            | 4                                                            |
|                  |            |                                      |                                                              |                                                                   |                     |                                      |                                                                     | 19             | 5                                                            | 4                                                            |
|                  |            |                                      |                                                              |                                                                   |                     |                                      |                                                                     | 20             | 5                                                            | 4                                                            |
|                  |            |                                      |                                                              |                                                                   |                     |                                      |                                                                     | 21             | 4                                                            | 3                                                            |
|                  |            |                                      |                                                              |                                                                   |                     |                                      |                                                                     | 22             | 5                                                            | 5                                                            |
|                  |            |                                      |                                                              |                                                                   |                     |                                      |                                                                     | 23             | 5                                                            | 5                                                            |

| No of respondent | Profession | Knowledge of the AGREE II instrument | Performance of appraisals using the AGREE I or II instrument | Number of appraised guidelines using the AGREE I or II instrument | Experience in years | Involvement in guideline development | Purpose of conducting appraisals using the AGREE I or II instrument | AGREE II Items | Assessment of the influence on <u>methodological quality</u> | Assessment of the influence on <u>recommendation for use</u> |
|------------------|------------|--------------------------------------|--------------------------------------------------------------|-------------------------------------------------------------------|---------------------|--------------------------------------|---------------------------------------------------------------------|----------------|--------------------------------------------------------------|--------------------------------------------------------------|
| 42               | Physician  | yes                                  | yes                                                          | < 10 guidelines                                                   | < 1 year            | no                                   | Writing of guideline synopses                                       | 1              | 4                                                            | 4                                                            |
|                  |            |                                      |                                                              |                                                                   |                     |                                      |                                                                     | 2              | 3                                                            | 4                                                            |
|                  |            |                                      |                                                              |                                                                   |                     |                                      |                                                                     | 3              | 3                                                            | 4                                                            |
|                  |            |                                      |                                                              |                                                                   |                     |                                      |                                                                     | 4              | 4                                                            | 3                                                            |
|                  |            |                                      |                                                              |                                                                   |                     |                                      |                                                                     | 5              | 3                                                            | 3                                                            |
|                  |            |                                      |                                                              |                                                                   |                     |                                      |                                                                     | 6              | 4                                                            | 4                                                            |
|                  |            |                                      |                                                              |                                                                   |                     |                                      |                                                                     | 7              | 5                                                            | 4                                                            |
|                  |            |                                      |                                                              |                                                                   |                     |                                      |                                                                     | 8              | 5                                                            | 4                                                            |
|                  |            |                                      |                                                              |                                                                   |                     |                                      |                                                                     | 9              | 5                                                            | 5                                                            |
|                  |            |                                      |                                                              |                                                                   |                     |                                      |                                                                     | 10             | 5                                                            | 5                                                            |
|                  |            |                                      |                                                              |                                                                   |                     |                                      |                                                                     | 11             | 4                                                            | 5                                                            |
|                  |            |                                      |                                                              |                                                                   |                     |                                      |                                                                     | 12             | 5                                                            | 5                                                            |
|                  |            |                                      |                                                              |                                                                   |                     |                                      |                                                                     | 13             | 4                                                            | 4                                                            |
|                  |            |                                      |                                                              |                                                                   |                     |                                      |                                                                     | 14             | 3                                                            | 4                                                            |
|                  |            |                                      |                                                              |                                                                   |                     |                                      |                                                                     | 15             | 4                                                            | 5                                                            |
|                  |            |                                      |                                                              |                                                                   |                     |                                      |                                                                     | 16             | 5                                                            | 5                                                            |
|                  |            |                                      |                                                              |                                                                   |                     |                                      |                                                                     | 17             | 5                                                            | 5                                                            |
|                  |            |                                      |                                                              |                                                                   |                     |                                      |                                                                     | 18             | 3                                                            | 4                                                            |
|                  |            |                                      |                                                              |                                                                   |                     |                                      |                                                                     | 19             | 3                                                            | 3                                                            |
|                  |            |                                      |                                                              |                                                                   |                     |                                      |                                                                     | 20             | 3                                                            | 3                                                            |
|                  |            |                                      |                                                              |                                                                   |                     |                                      |                                                                     | 21             | 3                                                            | 3                                                            |

| No of respondent | Profession                        | Knowledge of the AGREE II instrument | Performance of appraisals using the AGREE I or II instrument | Number of appraised guidelines using the AGREE I or II instrument | Experience in years | Involvement in guideline development | Purpose of conducting appraisals using the AGREE I or II instrument | AGREE II Items | Assessment of the influence on <u>methodological quality</u> | Assessment of the influence on <u>recommendation for use</u> |
|------------------|-----------------------------------|--------------------------------------|--------------------------------------------------------------|-------------------------------------------------------------------|---------------------|--------------------------------------|---------------------------------------------------------------------|----------------|--------------------------------------------------------------|--------------------------------------------------------------|
|                  |                                   |                                      |                                                              |                                                                   |                     |                                      |                                                                     | 22             | 5                                                            | 5                                                            |
|                  |                                   |                                      |                                                              |                                                                   |                     |                                      |                                                                     | 23             | 5                                                            | 4                                                            |
| 43               | Physician / methodological expert | yes                                  | yes                                                          | > 20 guidelines                                                   | > 5 years           | yes                                  | Adaptation of guidelines                                            | 1              | 1                                                            | 1                                                            |
|                  |                                   |                                      |                                                              |                                                                   |                     |                                      |                                                                     | 2              | 5                                                            | 5                                                            |
|                  |                                   |                                      |                                                              |                                                                   |                     |                                      |                                                                     | 3              | 4                                                            | 4                                                            |
|                  |                                   |                                      |                                                              |                                                                   |                     |                                      |                                                                     | 4              | 5                                                            | 3                                                            |
|                  |                                   |                                      |                                                              |                                                                   |                     |                                      |                                                                     | 5              | 4                                                            | 3                                                            |
|                  |                                   |                                      |                                                              |                                                                   |                     |                                      |                                                                     | 6              | 3                                                            | 2                                                            |
|                  |                                   |                                      |                                                              |                                                                   |                     |                                      |                                                                     | 7              | 5                                                            | 5                                                            |
|                  |                                   |                                      |                                                              |                                                                   |                     |                                      |                                                                     | 8              | 5                                                            | 4                                                            |
|                  |                                   |                                      |                                                              |                                                                   |                     |                                      |                                                                     | 9              | 5                                                            | 4                                                            |
|                  |                                   |                                      |                                                              |                                                                   |                     |                                      |                                                                     | 10             | 4                                                            | 3                                                            |
|                  |                                   |                                      |                                                              |                                                                   |                     |                                      |                                                                     | 11             | 5                                                            | 5                                                            |
|                  |                                   |                                      |                                                              |                                                                   |                     |                                      |                                                                     | 12             | 5                                                            | 5                                                            |
|                  |                                   |                                      |                                                              |                                                                   |                     |                                      |                                                                     | 13             | 3                                                            | 2                                                            |
| 14               | 2                                 | 0                                    |                                                              |                                                                   |                     |                                      |                                                                     |                |                                                              |                                                              |
| 15               | 2                                 | 4                                    |                                                              |                                                                   |                     |                                      |                                                                     |                |                                                              |                                                              |
| 16               | 2                                 | 3                                    |                                                              |                                                                   |                     |                                      |                                                                     |                |                                                              |                                                              |
| 17               | 0                                 | 2                                    |                                                              |                                                                   |                     |                                      |                                                                     |                |                                                              |                                                              |
| 18               | 1                                 | 2                                    |                                                              |                                                                   |                     |                                      |                                                                     |                |                                                              |                                                              |
| 19               | 0                                 | 2                                    |                                                              |                                                                   |                     |                                      |                                                                     |                |                                                              |                                                              |

| No of respondent | Profession | Knowledge of the AGREE II instrument | Performance of appraisals using the AGREE I or II instrument | Number of appraised guidelines using the AGREE I or II instrument | Experience in years | Involvement in guideline development | Purpose of conducting appraisals using the AGREE I or II instrument | AGREE II Items | Assessment of the influence on <u>methodological quality</u> | Assessment of the influence on <u>recommendation for use</u> |
|------------------|------------|--------------------------------------|--------------------------------------------------------------|-------------------------------------------------------------------|---------------------|--------------------------------------|---------------------------------------------------------------------|----------------|--------------------------------------------------------------|--------------------------------------------------------------|
|                  |            |                                      |                                                              |                                                                   |                     |                                      |                                                                     | 20             | 1                                                            | 1                                                            |
|                  |            |                                      |                                                              |                                                                   |                     |                                      |                                                                     | 21             | 1                                                            | 0                                                            |
|                  |            |                                      |                                                              |                                                                   |                     |                                      |                                                                     | 22             | 5                                                            | 5                                                            |
|                  |            |                                      |                                                              |                                                                   |                     |                                      |                                                                     | 23             | 5                                                            | 5                                                            |
| 44               | Physician  | yes                                  | yes                                                          | < 10 guidelines                                                   | 1-5 years           | yes                                  | Assessment of guideline quality                                     | 1              | 5                                                            | 5                                                            |
|                  |            |                                      |                                                              |                                                                   |                     |                                      |                                                                     | 2              | 5                                                            | 5                                                            |
|                  |            |                                      |                                                              |                                                                   |                     |                                      |                                                                     | 3              | 5                                                            | 5                                                            |
|                  |            |                                      |                                                              |                                                                   |                     |                                      |                                                                     | 4              | 2                                                            | 3                                                            |
|                  |            |                                      |                                                              |                                                                   |                     |                                      |                                                                     | 5              | 3                                                            | 3                                                            |
|                  |            |                                      |                                                              |                                                                   |                     |                                      |                                                                     | 6              | 3                                                            | 5                                                            |
|                  |            |                                      |                                                              |                                                                   |                     |                                      |                                                                     | 7              | 5                                                            | 3                                                            |
|                  |            |                                      |                                                              |                                                                   |                     |                                      |                                                                     | 8              | 5                                                            | 4                                                            |
|                  |            |                                      |                                                              |                                                                   |                     |                                      |                                                                     | 9              | 5                                                            | 4                                                            |
|                  |            |                                      |                                                              |                                                                   |                     |                                      |                                                                     | 10             | 5                                                            | 5                                                            |
|                  |            |                                      |                                                              |                                                                   |                     |                                      |                                                                     | 11             | 3                                                            | 4                                                            |
|                  |            |                                      |                                                              |                                                                   |                     |                                      |                                                                     | 12             | 5                                                            | 4                                                            |
|                  |            |                                      |                                                              |                                                                   |                     |                                      |                                                                     | 13             | 4                                                            | 4                                                            |
|                  |            |                                      |                                                              |                                                                   |                     |                                      |                                                                     | 14             | 2                                                            | 2                                                            |
| 15               | 5          | 5                                    |                                                              |                                                                   |                     |                                      |                                                                     |                |                                                              |                                                              |
| 16               | 4          | 4                                    |                                                              |                                                                   |                     |                                      |                                                                     |                |                                                              |                                                              |
| 17               | 5          | 5                                    |                                                              |                                                                   |                     |                                      |                                                                     |                |                                                              |                                                              |



| No of respondent | Profession            | Knowledge of the AGREE II instrument | Performance of appraisals using the AGREE I or II instrument | Number of appraised guidelines using the AGREE I or II instrument | Experience in years | Involvement in guideline development | Purpose of conducting appraisals using the AGREE I or II instrument | AGREE II Items | Assessment of the influence on <u>methodological quality</u> | Assessment of the influence on <u>recommendation for use</u> |
|------------------|-----------------------|--------------------------------------|--------------------------------------------------------------|-------------------------------------------------------------------|---------------------|--------------------------------------|---------------------------------------------------------------------|----------------|--------------------------------------------------------------|--------------------------------------------------------------|
|                  |                       |                                      |                                                              |                                                                   |                     |                                      |                                                                     | 18             | 3                                                            | 3                                                            |
|                  |                       |                                      |                                                              |                                                                   |                     |                                      |                                                                     | 19             | 4                                                            | 4                                                            |
|                  |                       |                                      |                                                              |                                                                   |                     |                                      |                                                                     | 20             | 3                                                            | 5                                                            |
|                  |                       |                                      |                                                              |                                                                   |                     |                                      |                                                                     | 21             | 3                                                            | 4                                                            |
|                  |                       |                                      |                                                              |                                                                   |                     |                                      |                                                                     | 22             | 5                                                            | 5                                                            |
|                  |                       |                                      |                                                              |                                                                   |                     |                                      |                                                                     | 23             | 5                                                            | 4                                                            |
| 45               | methodological expert | yes                                  | yes                                                          | 10-20 guidelines                                                  | 1-5 years           | yes                                  | Assessment of guideline quality, Writing of guideline synopses      | 1              | 2                                                            | 2                                                            |
|                  |                       |                                      |                                                              |                                                                   |                     |                                      |                                                                     | 2              | 3                                                            | 2                                                            |
|                  |                       |                                      |                                                              |                                                                   |                     |                                      |                                                                     | 3              | 3                                                            | 3                                                            |
|                  |                       |                                      |                                                              |                                                                   |                     |                                      |                                                                     | 4              | 2                                                            | 2                                                            |
|                  |                       |                                      |                                                              |                                                                   |                     |                                      |                                                                     | 5              | 2                                                            | 2                                                            |
|                  |                       |                                      |                                                              |                                                                   |                     |                                      |                                                                     | 6              | 2                                                            | 3                                                            |
|                  |                       |                                      |                                                              |                                                                   |                     |                                      |                                                                     | 7              | 5                                                            | 3                                                            |
|                  |                       |                                      |                                                              |                                                                   |                     |                                      |                                                                     | 8              | 4                                                            | 2                                                            |
|                  |                       |                                      |                                                              |                                                                   |                     |                                      |                                                                     | 9              | 3                                                            | 2                                                            |
|                  |                       |                                      |                                                              |                                                                   |                     |                                      |                                                                     | 10             | 3                                                            | 2                                                            |
|                  |                       |                                      |                                                              |                                                                   |                     |                                      |                                                                     | 11             | 3                                                            | 3                                                            |
|                  |                       |                                      |                                                              |                                                                   |                     |                                      |                                                                     | 12             | 5                                                            | 5                                                            |
|                  |                       |                                      |                                                              |                                                                   |                     |                                      |                                                                     | 13             | 3                                                            | 3                                                            |
|                  |                       |                                      |                                                              |                                                                   |                     |                                      |                                                                     | 14             | 1                                                            | 1                                                            |
|                  |                       |                                      |                                                              |                                                                   |                     |                                      |                                                                     | 15             | 3                                                            | 4                                                            |

| No of respondent | Profession                        | Knowledge of the AGREE II instrument | Performance of appraisals using the AGREE I or II instrument | Number of appraised guidelines using the AGREE I or II instrument | Experience in years | Involvement in guideline development | Purpose of conducting appraisals using the AGREE I or II instrument | AGREE II Items | Assessment of the influence on <u>methodological quality</u> | Assessment of the influence on <u>recommendation for use</u> |
|------------------|-----------------------------------|--------------------------------------|--------------------------------------------------------------|-------------------------------------------------------------------|---------------------|--------------------------------------|---------------------------------------------------------------------|----------------|--------------------------------------------------------------|--------------------------------------------------------------|
|                  |                                   |                                      |                                                              |                                                                   |                     |                                      |                                                                     | 16             | 3                                                            | 4                                                            |
|                  |                                   |                                      |                                                              |                                                                   |                     |                                      |                                                                     | 17             | 3                                                            | 4                                                            |
|                  |                                   |                                      |                                                              |                                                                   |                     |                                      |                                                                     | 18             | 4                                                            | 3                                                            |
|                  |                                   |                                      |                                                              |                                                                   |                     |                                      |                                                                     | 19             | 4                                                            | 4                                                            |
|                  |                                   |                                      |                                                              |                                                                   |                     |                                      |                                                                     | 20             | 3                                                            | 3                                                            |
|                  |                                   |                                      |                                                              |                                                                   |                     |                                      |                                                                     | 21             | 3                                                            | 3                                                            |
|                  |                                   |                                      |                                                              |                                                                   |                     |                                      |                                                                     | 22             | 4                                                            | 4                                                            |
|                  |                                   |                                      |                                                              |                                                                   |                     |                                      |                                                                     | 23             | 2                                                            | 2                                                            |
| 46               | Physician / methodological expert | yes                                  | yes                                                          | 10-20 guidelines                                                  | > 5 years           | yes                                  | -                                                                   | 1              | 5                                                            | 5                                                            |
|                  |                                   |                                      |                                                              |                                                                   |                     |                                      |                                                                     | 2              | 5                                                            | 5                                                            |
|                  |                                   |                                      |                                                              |                                                                   |                     |                                      |                                                                     | 3              | 5                                                            | 5                                                            |
|                  |                                   |                                      |                                                              |                                                                   |                     |                                      |                                                                     | 4              | 4                                                            | 4                                                            |
|                  |                                   |                                      |                                                              |                                                                   |                     |                                      |                                                                     | 5              | 3                                                            | 3                                                            |
|                  |                                   |                                      |                                                              |                                                                   |                     |                                      |                                                                     | 6              | 4                                                            | 4                                                            |
|                  |                                   |                                      |                                                              |                                                                   |                     |                                      |                                                                     | 7              | 5                                                            | 5                                                            |
|                  |                                   |                                      |                                                              |                                                                   |                     |                                      |                                                                     | 8              | 4                                                            | 4                                                            |
|                  |                                   |                                      |                                                              |                                                                   |                     |                                      |                                                                     | 9              | 4                                                            | 4                                                            |
|                  |                                   |                                      |                                                              |                                                                   |                     |                                      |                                                                     | 10             | 5                                                            | 5                                                            |
|                  |                                   |                                      |                                                              |                                                                   |                     |                                      |                                                                     | 11             | 4                                                            | 4                                                            |
|                  |                                   |                                      |                                                              |                                                                   |                     |                                      |                                                                     | 12             | 5                                                            | 5                                                            |
|                  |                                   |                                      |                                                              |                                                                   |                     |                                      |                                                                     | 13             | 4                                                            | 4                                                            |

| No of respondent | Profession | Knowledge of the AGREE II instrument | Performance of appraisals using the AGREE I or II instrument | Number of appraised guidelines using the AGREE I or II instrument | Experience in years | Involvement in guideline development | Purpose of conducting appraisals using the AGREE I or II instrument | AGREE II Items | Assessment of the influence on <u>methodological quality</u> | Assessment of the influence on <u>recommendation for use</u> |
|------------------|------------|--------------------------------------|--------------------------------------------------------------|-------------------------------------------------------------------|---------------------|--------------------------------------|---------------------------------------------------------------------|----------------|--------------------------------------------------------------|--------------------------------------------------------------|
|                  |            |                                      |                                                              |                                                                   |                     |                                      |                                                                     | 14             | 3                                                            | 3                                                            |
|                  |            |                                      |                                                              |                                                                   |                     |                                      |                                                                     | 15             | 5                                                            | 5                                                            |
|                  |            |                                      |                                                              |                                                                   |                     |                                      |                                                                     | 16             | 1                                                            | 1                                                            |
|                  |            |                                      |                                                              |                                                                   |                     |                                      |                                                                     | 17             | 5                                                            | 5                                                            |
|                  |            |                                      |                                                              |                                                                   |                     |                                      |                                                                     | 18             | 1                                                            | 1                                                            |
|                  |            |                                      |                                                              |                                                                   |                     |                                      |                                                                     | 19             | 1                                                            | 1                                                            |
|                  |            |                                      |                                                              |                                                                   |                     |                                      |                                                                     | 20             | 3                                                            | 3                                                            |
|                  |            |                                      |                                                              |                                                                   |                     |                                      |                                                                     | 21             | 1                                                            | 1                                                            |
|                  |            |                                      |                                                              |                                                                   |                     |                                      |                                                                     | 22             | 5                                                            | 5                                                            |
|                  |            |                                      |                                                              |                                                                   |                     |                                      |                                                                     | 23             | 5                                                            | 5                                                            |
| 47               | other      | yes                                  | yes                                                          | > 20 guidelines                                                   | > 5 years           | yes                                  | Assessment of guideline quality                                     | 1              | 4                                                            | 4                                                            |
|                  |            |                                      |                                                              |                                                                   |                     |                                      |                                                                     | 2              | 5                                                            | 4                                                            |
|                  |            |                                      |                                                              |                                                                   |                     |                                      |                                                                     | 3              | 5                                                            | 4                                                            |
|                  |            |                                      |                                                              |                                                                   |                     |                                      |                                                                     | 4              | 5                                                            | 5                                                            |
|                  |            |                                      |                                                              |                                                                   |                     |                                      |                                                                     | 5              | 5                                                            | 5                                                            |
|                  |            |                                      |                                                              |                                                                   |                     |                                      |                                                                     | 6              | 5                                                            | 5                                                            |
|                  |            |                                      |                                                              |                                                                   |                     |                                      |                                                                     | 7              | 5                                                            | 4                                                            |
|                  |            |                                      |                                                              |                                                                   |                     |                                      |                                                                     | 8              | 5                                                            | 4                                                            |
|                  |            |                                      |                                                              |                                                                   |                     |                                      |                                                                     | 9              | 5                                                            | 5                                                            |
|                  |            |                                      |                                                              |                                                                   |                     |                                      |                                                                     | 10             | 5                                                            | 5                                                            |
|                  |            |                                      |                                                              |                                                                   |                     |                                      |                                                                     | 11             | 5                                                            | 5                                                            |

| No of respondent | Profession | Knowledge of the AGREE II instrument | Performance of appraisals using the AGREE I or II instrument | Number of appraised guidelines using the AGREE I or II instrument | Experience in years | Involvement in guideline development | Purpose of conducting appraisals using the AGREE I or II instrument | AGREE II Items | Assessment of the influence on <u>methodological quality</u> | Assessment of the influence on <u>recommendation for use</u> |
|------------------|------------|--------------------------------------|--------------------------------------------------------------|-------------------------------------------------------------------|---------------------|--------------------------------------|---------------------------------------------------------------------|----------------|--------------------------------------------------------------|--------------------------------------------------------------|
|                  |            |                                      |                                                              |                                                                   |                     |                                      |                                                                     | 12             | 5                                                            | 5                                                            |
|                  |            |                                      |                                                              |                                                                   |                     |                                      |                                                                     | 13             | 5                                                            | 4                                                            |
|                  |            |                                      |                                                              |                                                                   |                     |                                      |                                                                     | 14             | 4                                                            | 4                                                            |
|                  |            |                                      |                                                              |                                                                   |                     |                                      |                                                                     | 15             | 5                                                            | 5                                                            |
|                  |            |                                      |                                                              |                                                                   |                     |                                      |                                                                     | 16             | 5                                                            | 5                                                            |
|                  |            |                                      |                                                              |                                                                   |                     |                                      |                                                                     | 17             | 4                                                            | 5                                                            |
|                  |            |                                      |                                                              |                                                                   |                     |                                      |                                                                     | 18             | 4                                                            | 5                                                            |
|                  |            |                                      |                                                              |                                                                   |                     |                                      |                                                                     | 19             | 4                                                            | 5                                                            |
|                  |            |                                      |                                                              |                                                                   |                     |                                      |                                                                     | 20             | 4                                                            | 5                                                            |
|                  |            |                                      |                                                              |                                                                   |                     |                                      |                                                                     | 21             | 4                                                            | 5                                                            |
|                  |            |                                      |                                                              |                                                                   |                     |                                      |                                                                     | 22             | 4                                                            | 4                                                            |
|                  |            |                                      |                                                              |                                                                   |                     |                                      |                                                                     | 23             | 4                                                            | 4                                                            |
| 48               | Physician  | yes                                  | yes                                                          | < 10 guidelines                                                   | < 1 year            | no                                   | Assessment of guideline quality                                     | 1              | 3                                                            | 3                                                            |
|                  |            |                                      |                                                              |                                                                   |                     |                                      |                                                                     | 2              | 3                                                            | 4                                                            |
|                  |            |                                      |                                                              |                                                                   |                     |                                      |                                                                     | 3              | 3                                                            | 4                                                            |
|                  |            |                                      |                                                              |                                                                   |                     |                                      |                                                                     | 4              | 4                                                            | 3                                                            |
|                  |            |                                      |                                                              |                                                                   |                     |                                      |                                                                     | 5              | 4                                                            | 3                                                            |
|                  |            |                                      |                                                              |                                                                   |                     |                                      |                                                                     | 6              | 4                                                            | 3                                                            |
|                  |            |                                      |                                                              |                                                                   |                     |                                      |                                                                     | 7              | 5                                                            | 5                                                            |
|                  |            |                                      |                                                              |                                                                   |                     |                                      |                                                                     | 8              | 5                                                            | 5                                                            |
|                  |            |                                      |                                                              |                                                                   |                     |                                      |                                                                     | 9              | 4                                                            | 4                                                            |

| No of respondent | Profession            | Knowledge of the AGREE II instrument | Performance of appraisals using the AGREE I or II instrument | Number of appraised guidelines using the AGREE I or II instrument | Experience in years | Involvement in guideline development | Purpose of conducting appraisals using the AGREE I or II instrument | AGREE II Items | Assessment of the influence on <u>methodological quality</u> | Assessment of the influence on <u>recommendation for use</u> |
|------------------|-----------------------|--------------------------------------|--------------------------------------------------------------|-------------------------------------------------------------------|---------------------|--------------------------------------|---------------------------------------------------------------------|----------------|--------------------------------------------------------------|--------------------------------------------------------------|
|                  |                       |                                      |                                                              |                                                                   |                     |                                      |                                                                     | 10             | 4                                                            | 4                                                            |
|                  |                       |                                      |                                                              |                                                                   |                     |                                      |                                                                     | 11             | 4                                                            | 4                                                            |
|                  |                       |                                      |                                                              |                                                                   |                     |                                      |                                                                     | 12             | 5                                                            | 4                                                            |
|                  |                       |                                      |                                                              |                                                                   |                     |                                      |                                                                     | 13             | 5                                                            | 5                                                            |
|                  |                       |                                      |                                                              |                                                                   |                     |                                      |                                                                     | 14             | 4                                                            | 2                                                            |
|                  |                       |                                      |                                                              |                                                                   |                     |                                      |                                                                     | 15             | 4                                                            | 5                                                            |
|                  |                       |                                      |                                                              |                                                                   |                     |                                      |                                                                     | 16             | 4                                                            | 4                                                            |
|                  |                       |                                      |                                                              |                                                                   |                     |                                      |                                                                     | 17             | 4                                                            | 5                                                            |
|                  |                       |                                      |                                                              |                                                                   |                     |                                      |                                                                     | 18             | 4                                                            | 2                                                            |
|                  |                       |                                      |                                                              |                                                                   |                     |                                      |                                                                     | 19             | 4                                                            | 5                                                            |
|                  |                       |                                      |                                                              |                                                                   |                     |                                      |                                                                     | 20             | 4                                                            | 2                                                            |
|                  |                       |                                      |                                                              |                                                                   |                     |                                      |                                                                     | 21             | 4                                                            | 2                                                            |
|                  |                       |                                      |                                                              |                                                                   |                     |                                      |                                                                     | 22             | 4                                                            | 4                                                            |
|                  |                       |                                      |                                                              |                                                                   |                     |                                      |                                                                     | 23             | 4                                                            | 3                                                            |
| 49               | methodological expert | yes                                  | yes                                                          | 10-20 guidelines                                                  | 1-5 years           | no                                   | Assessment of guideline quality                                     | 1              | 1                                                            | 2                                                            |
|                  |                       |                                      |                                                              |                                                                   |                     |                                      |                                                                     | 2              | 1                                                            | 2                                                            |
|                  |                       |                                      |                                                              |                                                                   |                     |                                      |                                                                     | 3              | 1                                                            | 2                                                            |
|                  |                       |                                      |                                                              |                                                                   |                     |                                      |                                                                     | 4              | 1                                                            | 1                                                            |
|                  |                       |                                      |                                                              |                                                                   |                     |                                      |                                                                     | 5              | 1                                                            | 1                                                            |
|                  |                       |                                      |                                                              |                                                                   |                     |                                      |                                                                     | 6              | 1                                                            | 1                                                            |
|                  |                       |                                      |                                                              |                                                                   |                     |                                      |                                                                     | 7              | 5                                                            | 5                                                            |

| No of respondent | Profession | Knowledge of the AGREE II instrument | Performance of appraisals using the AGREE I or II instrument | Number of appraised guidelines using the AGREE I or II instrument | Experience in years | Involvement in guideline development | Purpose of conducting appraisals using the AGREE I or II instrument | AGREE II Items | Assessment of the influence on <u>methodological quality</u> | Assessment of the influence on <u>recommendation for use</u> |
|------------------|------------|--------------------------------------|--------------------------------------------------------------|-------------------------------------------------------------------|---------------------|--------------------------------------|---------------------------------------------------------------------|----------------|--------------------------------------------------------------|--------------------------------------------------------------|
|                  |            |                                      |                                                              |                                                                   |                     |                                      |                                                                     | 8              | 4                                                            | 4                                                            |
|                  |            |                                      |                                                              |                                                                   |                     |                                      |                                                                     | 9              | 5                                                            | 5                                                            |
|                  |            |                                      |                                                              |                                                                   |                     |                                      |                                                                     | 10             | 3                                                            | 3                                                            |
|                  |            |                                      |                                                              |                                                                   |                     |                                      |                                                                     | 11             | 5                                                            | 5                                                            |
|                  |            |                                      |                                                              |                                                                   |                     |                                      |                                                                     | 12             | 4                                                            | 4                                                            |
|                  |            |                                      |                                                              |                                                                   |                     |                                      |                                                                     | 13             | 3                                                            | 3                                                            |
|                  |            |                                      |                                                              |                                                                   |                     |                                      |                                                                     | 14             | 1                                                            | 1                                                            |
|                  |            |                                      |                                                              |                                                                   |                     |                                      |                                                                     | 15             | 3                                                            | 4                                                            |
|                  |            |                                      |                                                              |                                                                   |                     |                                      |                                                                     | 16             | 3                                                            | 3                                                            |
|                  |            |                                      |                                                              |                                                                   |                     |                                      |                                                                     | 17             | 3                                                            | 3                                                            |
|                  |            |                                      |                                                              |                                                                   |                     |                                      |                                                                     | 18             | 1                                                            | 1                                                            |
|                  |            |                                      |                                                              |                                                                   |                     |                                      |                                                                     | 19             | 1                                                            | 1                                                            |
|                  |            |                                      |                                                              |                                                                   |                     |                                      |                                                                     | 20             | 1                                                            | 1                                                            |
|                  |            |                                      |                                                              |                                                                   |                     |                                      |                                                                     | 21             | 0                                                            | 0                                                            |
|                  |            |                                      |                                                              |                                                                   |                     |                                      |                                                                     | 22             | 4                                                            | 4                                                            |
|                  |            |                                      |                                                              |                                                                   |                     |                                      |                                                                     | 23             | 4                                                            | 4                                                            |
| 50               | other      | yes                                  | yes                                                          | < 10 guidelines                                                   | < 1 year            | yes                                  | Research                                                            | 1              | 4                                                            | 4                                                            |
|                  |            |                                      |                                                              |                                                                   |                     |                                      |                                                                     | 2              | 4                                                            | 5                                                            |
|                  |            |                                      |                                                              |                                                                   |                     |                                      |                                                                     | 3              | 3                                                            | 3                                                            |
|                  |            |                                      |                                                              |                                                                   |                     |                                      |                                                                     | 4              | 4                                                            | 4                                                            |
|                  |            |                                      |                                                              |                                                                   |                     |                                      |                                                                     | 5              | 3                                                            | 4                                                            |

| No of respondent | Profession | Knowledge of the AGREE II instrument | Performance of appraisals using the AGREE I or II instrument | Number of appraised guidelines using the AGREE I or II instrument | Experience in years | Involvement in guideline development | Purpose of conducting appraisals using the AGREE I or II instrument | AGREE II Items | Assessment of the influence on <u>methodological quality</u> | Assessment of the influence on <u>recommendation for use</u> |
|------------------|------------|--------------------------------------|--------------------------------------------------------------|-------------------------------------------------------------------|---------------------|--------------------------------------|---------------------------------------------------------------------|----------------|--------------------------------------------------------------|--------------------------------------------------------------|
|                  |            |                                      |                                                              |                                                                   |                     |                                      |                                                                     | 6              | 4                                                            | 4                                                            |
|                  |            |                                      |                                                              |                                                                   |                     |                                      |                                                                     | 7              | 5                                                            | 5                                                            |
|                  |            |                                      |                                                              |                                                                   |                     |                                      |                                                                     | 8              | 4                                                            | 4                                                            |
|                  |            |                                      |                                                              |                                                                   |                     |                                      |                                                                     | 9              | 5                                                            | 5                                                            |
|                  |            |                                      |                                                              |                                                                   |                     |                                      |                                                                     | 10             | 4                                                            | 4                                                            |
|                  |            |                                      |                                                              |                                                                   |                     |                                      |                                                                     | 11             | 3                                                            | 3                                                            |
|                  |            |                                      |                                                              |                                                                   |                     |                                      |                                                                     | 12             | 4                                                            | 4                                                            |
|                  |            |                                      |                                                              |                                                                   |                     |                                      |                                                                     | 13             | 4                                                            | 4                                                            |
|                  |            |                                      |                                                              |                                                                   |                     |                                      |                                                                     | 14             | 5                                                            | 5                                                            |
|                  |            |                                      |                                                              |                                                                   |                     |                                      |                                                                     | 15             | 4                                                            | 4                                                            |
|                  |            |                                      |                                                              |                                                                   |                     |                                      |                                                                     | 16             | 4                                                            | 5                                                            |
|                  |            |                                      |                                                              |                                                                   |                     |                                      |                                                                     | 17             | 5                                                            | 5                                                            |
|                  |            |                                      |                                                              |                                                                   |                     |                                      |                                                                     | 18             | 4                                                            | 4                                                            |
|                  |            |                                      |                                                              |                                                                   |                     |                                      |                                                                     | 19             | 4                                                            | 4                                                            |
| 51               | Physician  | yes                                  | yes                                                          | < 10 guidelines                                                   | < 1 year            | no                                   | Assessment of guideline quality                                     | 1              | 3                                                            | 4                                                            |
|                  |            |                                      |                                                              |                                                                   |                     |                                      |                                                                     | 2              | 3                                                            | 3                                                            |
|                  |            |                                      |                                                              |                                                                   |                     |                                      |                                                                     | 3              | 3                                                            | 3                                                            |

| No of respondent | Profession  | Knowledge of the AGREE II instrument | Performance of appraisals using the AGREE I or II instrument | Number of appraised guidelines using the AGREE I or II instrument | Experience in years | Involvement in guideline development | Purpose of conducting appraisals using the AGREE I or II instrument | AGREE II Items | Assessment of the influence on <u>methodological quality</u> | Assessment of the influence on <u>recommendation for use</u> |
|------------------|-------------|--------------------------------------|--------------------------------------------------------------|-------------------------------------------------------------------|---------------------|--------------------------------------|---------------------------------------------------------------------|----------------|--------------------------------------------------------------|--------------------------------------------------------------|
|                  |             |                                      |                                                              |                                                                   |                     |                                      |                                                                     | 4              | 5                                                            | 5                                                            |
|                  |             |                                      |                                                              |                                                                   |                     |                                      |                                                                     | 5              | 5                                                            | 5                                                            |
|                  |             |                                      |                                                              |                                                                   |                     |                                      |                                                                     | 6              | 4                                                            | 4                                                            |
|                  |             |                                      |                                                              |                                                                   |                     |                                      |                                                                     | 7              | 5                                                            | 5                                                            |
|                  |             |                                      |                                                              |                                                                   |                     |                                      |                                                                     | 8              | 5                                                            | 5                                                            |
|                  |             |                                      |                                                              |                                                                   |                     |                                      |                                                                     | 9              | 5                                                            | 5                                                            |
|                  |             |                                      |                                                              |                                                                   |                     |                                      |                                                                     | 10             | 5                                                            | 4                                                            |
|                  |             |                                      |                                                              |                                                                   |                     |                                      |                                                                     | 11             | 5                                                            | 5                                                            |
|                  |             |                                      |                                                              |                                                                   |                     |                                      |                                                                     | 12             | 5                                                            | 5                                                            |
|                  |             |                                      |                                                              |                                                                   |                     |                                      |                                                                     | 13             | 4                                                            | 4                                                            |
|                  |             |                                      |                                                              |                                                                   |                     |                                      |                                                                     | 14             | 3                                                            | 3                                                            |
|                  |             |                                      |                                                              |                                                                   |                     |                                      |                                                                     | 15             | 4                                                            | 4                                                            |
|                  |             |                                      |                                                              |                                                                   |                     |                                      |                                                                     | 16             | 4                                                            | 4                                                            |
|                  |             |                                      |                                                              |                                                                   |                     |                                      |                                                                     | 17             | 4                                                            | 5                                                            |
|                  |             |                                      |                                                              |                                                                   |                     |                                      |                                                                     | 18             | 4                                                            | 4                                                            |
| 19               | 3           | 3                                    |                                                              |                                                                   |                     |                                      |                                                                     |                |                                                              |                                                              |
| 20               | 3           | 3                                    |                                                              |                                                                   |                     |                                      |                                                                     |                |                                                              |                                                              |
| 21               | 3           | 3                                    |                                                              |                                                                   |                     |                                      |                                                                     |                |                                                              |                                                              |
| 22               | 5           | 4                                    |                                                              |                                                                   |                     |                                      |                                                                     |                |                                                              |                                                              |
| 23               | 5           | 4                                    |                                                              |                                                                   |                     |                                      |                                                                     |                |                                                              |                                                              |
| 52               | Physician / | yes                                  | yes                                                          | < 10                                                              | 1-5 years           | yes                                  | -                                                                   | 1              | 5                                                            | 3                                                            |



| No of respondent | Profession            | Knowledge of the AGREE II instrument | Performance of appraisals using the AGREE I or II instrument | Number of appraised guidelines using the AGREE I or II instrument | Experience in years | Involvement in guideline development | Purpose of conducting appraisals using the AGREE I or II instrument | AGREE II Items | Assessment of the influence on <u>methodological quality</u> | Assessment of the influence on <u>recommendation for use</u> |
|------------------|-----------------------|--------------------------------------|--------------------------------------------------------------|-------------------------------------------------------------------|---------------------|--------------------------------------|---------------------------------------------------------------------|----------------|--------------------------------------------------------------|--------------------------------------------------------------|
|                  | methodological expert |                                      |                                                              | guidelines                                                        |                     |                                      |                                                                     | 2              | 3                                                            | 3                                                            |
|                  |                       | 3                                    | 3                                                            | 4                                                                 |                     |                                      |                                                                     |                |                                                              |                                                              |
|                  |                       | 4                                    | 3                                                            | 2                                                                 |                     |                                      |                                                                     |                |                                                              |                                                              |
|                  |                       | 5                                    | 2                                                            | 2                                                                 |                     |                                      |                                                                     |                |                                                              |                                                              |
|                  |                       | 6                                    | 3                                                            | 3                                                                 |                     |                                      |                                                                     |                |                                                              |                                                              |
|                  |                       | 7                                    | 3                                                            | 3                                                                 |                     |                                      |                                                                     |                |                                                              |                                                              |
|                  |                       | 8                                    | 5                                                            | 3                                                                 |                     |                                      |                                                                     |                |                                                              |                                                              |
|                  |                       | 9                                    | 5                                                            | 3                                                                 |                     |                                      |                                                                     |                |                                                              |                                                              |
|                  |                       | 10                                   | 2                                                            | 2                                                                 |                     |                                      |                                                                     |                |                                                              |                                                              |
|                  |                       | 11                                   | 4                                                            | 4                                                                 |                     |                                      |                                                                     |                |                                                              |                                                              |
|                  |                       | 12                                   | 5                                                            | 5                                                                 |                     |                                      |                                                                     |                |                                                              |                                                              |
|                  |                       | 13                                   | 2                                                            | 2                                                                 |                     |                                      |                                                                     |                |                                                              |                                                              |
|                  |                       | 14                                   | 1                                                            | 1                                                                 |                     |                                      |                                                                     |                |                                                              |                                                              |
|                  |                       | 15                                   | 2                                                            | 4                                                                 |                     |                                      |                                                                     |                |                                                              |                                                              |
|                  |                       | 16                                   | 2                                                            | 4                                                                 |                     |                                      |                                                                     |                |                                                              |                                                              |
|                  |                       | 17                                   | 3                                                            | 2                                                                 |                     |                                      |                                                                     |                |                                                              |                                                              |
|                  | 18                    | 3                                    | 2                                                            |                                                                   |                     |                                      |                                                                     |                |                                                              |                                                              |
|                  | 19                    | 3                                    | 3                                                            |                                                                   |                     |                                      |                                                                     |                |                                                              |                                                              |
|                  | 20                    | 2                                    | 2                                                            |                                                                   |                     |                                      |                                                                     |                |                                                              |                                                              |
|                  | 21                    | 2                                    | 1                                                            |                                                                   |                     |                                      |                                                                     |                |                                                              |                                                              |
|                  | 22                    | 2                                    | 1                                                            |                                                                   |                     |                                      |                                                                     |                |                                                              |                                                              |

| No of respondent | Profession | Knowledge of the AGREE II instrument | Performance of appraisals using the AGREE I or II instrument | Number of appraised guidelines using the AGREE I or II instrument | Experience in years | Involvement in guideline development | Purpose of conducting appraisals using the AGREE I or II instrument | AGREE II Items | Assessment of the influence on <u>methodological quality</u> | Assessment of the influence on <u>recommendation for use</u> |
|------------------|------------|--------------------------------------|--------------------------------------------------------------|-------------------------------------------------------------------|---------------------|--------------------------------------|---------------------------------------------------------------------|----------------|--------------------------------------------------------------|--------------------------------------------------------------|
|                  |            |                                      |                                                              |                                                                   |                     |                                      |                                                                     | 23             | 5                                                            | 3                                                            |
| 53               | other      | yes                                  | yes                                                          | < 10 guidelines                                                   | 1-5 years           | no                                   | Assessment of guideline quality                                     | 1              | 4                                                            | 1                                                            |
|                  |            |                                      |                                                              |                                                                   |                     |                                      |                                                                     | 2              | 3                                                            | 1                                                            |
|                  |            |                                      |                                                              |                                                                   |                     |                                      |                                                                     | 3              | 3                                                            | 4                                                            |
|                  |            |                                      |                                                              |                                                                   |                     |                                      |                                                                     | 4              | 5                                                            | 4                                                            |
|                  |            |                                      |                                                              |                                                                   |                     |                                      |                                                                     | 5              | 3                                                            | 2                                                            |
|                  |            |                                      |                                                              |                                                                   |                     |                                      |                                                                     | 6              | 5                                                            | 5                                                            |
|                  |            |                                      |                                                              |                                                                   |                     |                                      |                                                                     | 7              | 5                                                            | 5                                                            |
|                  |            |                                      |                                                              |                                                                   |                     |                                      |                                                                     | 8              | 4                                                            | 2                                                            |
|                  |            |                                      |                                                              |                                                                   |                     |                                      |                                                                     | 9              | 4                                                            | 2                                                            |
|                  |            |                                      |                                                              |                                                                   |                     |                                      |                                                                     | 10             | 4                                                            | 3                                                            |
|                  |            |                                      |                                                              |                                                                   |                     |                                      |                                                                     | 11             | 4                                                            | 5                                                            |
|                  |            |                                      |                                                              |                                                                   |                     |                                      |                                                                     | 12             | 3                                                            | 4                                                            |
|                  |            |                                      |                                                              |                                                                   |                     |                                      |                                                                     | 13             | 5                                                            | 3                                                            |
| 14               | 3          | 2                                    |                                                              |                                                                   |                     |                                      |                                                                     |                |                                                              |                                                              |
| 15               | 3          | 5                                    |                                                              |                                                                   |                     |                                      |                                                                     |                |                                                              |                                                              |
| 16               | 3          | 5                                    |                                                              |                                                                   |                     |                                      |                                                                     |                |                                                              |                                                              |
| 17               | 3          | 5                                    |                                                              |                                                                   |                     |                                      |                                                                     |                |                                                              |                                                              |
| 18               | 3          | 3                                    |                                                              |                                                                   |                     |                                      |                                                                     |                |                                                              |                                                              |
| 19               | 3          | 3                                    |                                                              |                                                                   |                     |                                      |                                                                     |                |                                                              |                                                              |
| 20               | 3          | 3                                    |                                                              |                                                                   |                     |                                      |                                                                     |                |                                                              |                                                              |

| No of respondent | Profession | Knowledge of the AGREE II instrument | Performance of appraisals using the AGREE I or II instrument | Number of appraised guidelines using the AGREE I or II instrument | Experience in years | Involvement in guideline development | Purpose of conducting appraisals using the AGREE I or II instrument | AGREE II Items | Assessment of the influence on <u>methodological quality</u> | Assessment of the influence on <u>recommendation for use</u> |
|------------------|------------|--------------------------------------|--------------------------------------------------------------|-------------------------------------------------------------------|---------------------|--------------------------------------|---------------------------------------------------------------------|----------------|--------------------------------------------------------------|--------------------------------------------------------------|
|                  |            |                                      |                                                              |                                                                   |                     |                                      |                                                                     | 21             | 3                                                            | 3                                                            |
|                  |            |                                      |                                                              |                                                                   |                     |                                      |                                                                     | 22             | 5                                                            | 5                                                            |
|                  |            |                                      |                                                              |                                                                   |                     |                                      |                                                                     | 23             | 5                                                            | 5                                                            |
| 54               | Physician  | yes                                  | yes                                                          | < 10 guidelines                                                   | 1-5 years           | yes                                  | Development of guidelines                                           | 1              | 4                                                            | 4                                                            |
|                  |            |                                      |                                                              |                                                                   |                     |                                      |                                                                     | 2              | 5                                                            | 5                                                            |
|                  |            |                                      |                                                              |                                                                   |                     |                                      |                                                                     | 3              | 5                                                            | 5                                                            |
|                  |            |                                      |                                                              |                                                                   |                     |                                      |                                                                     | 4              | 4                                                            | 3                                                            |
|                  |            |                                      |                                                              |                                                                   |                     |                                      |                                                                     | 5              | 4                                                            | 3                                                            |
|                  |            |                                      |                                                              |                                                                   |                     |                                      |                                                                     | 6              | 4                                                            | 4                                                            |
|                  |            |                                      |                                                              |                                                                   |                     |                                      |                                                                     | 7              | 5                                                            | 5                                                            |
|                  |            |                                      |                                                              |                                                                   |                     |                                      |                                                                     | 8              | 5                                                            | 5                                                            |
|                  |            |                                      |                                                              |                                                                   |                     |                                      |                                                                     | 9              | 5                                                            | 4                                                            |
|                  |            |                                      |                                                              |                                                                   |                     |                                      |                                                                     | 10             | 5                                                            | 4                                                            |
|                  |            |                                      |                                                              |                                                                   |                     |                                      |                                                                     | 11             | 5                                                            | 5                                                            |
|                  |            |                                      |                                                              |                                                                   |                     |                                      |                                                                     | 12             | 5                                                            | 5                                                            |
|                  |            |                                      |                                                              |                                                                   |                     |                                      |                                                                     | 13             | 5                                                            | 4                                                            |
|                  |            |                                      |                                                              |                                                                   |                     |                                      |                                                                     | 14             | 4                                                            | 4                                                            |
| 15               | 4          | 4                                    |                                                              |                                                                   |                     |                                      |                                                                     |                |                                                              |                                                              |
| 16               | 4          | 4                                    |                                                              |                                                                   |                     |                                      |                                                                     |                |                                                              |                                                              |
| 17               | 5          | 5                                    |                                                              |                                                                   |                     |                                      |                                                                     |                |                                                              |                                                              |
| 18               | 4          | 3                                    |                                                              |                                                                   |                     |                                      |                                                                     |                |                                                              |                                                              |

| No of respondent | Profession | Knowledge of the AGREE II instrument | Performance of appraisals using the AGREE I or II instrument | Number of appraised guidelines using the AGREE I or II instrument | Experience in years | Involvement in guideline development | Purpose of conducting appraisals using the AGREE I or II instrument | AGREE II Items | Assessment of the influence on <u>methodological quality</u> | Assessment of the influence on <u>recommendation for use</u> |
|------------------|------------|--------------------------------------|--------------------------------------------------------------|-------------------------------------------------------------------|---------------------|--------------------------------------|---------------------------------------------------------------------|----------------|--------------------------------------------------------------|--------------------------------------------------------------|
|                  |            |                                      |                                                              |                                                                   |                     |                                      |                                                                     | 19             | 3                                                            | 3                                                            |
|                  |            |                                      |                                                              |                                                                   |                     |                                      |                                                                     | 20             | 4                                                            | 3                                                            |
|                  |            |                                      |                                                              |                                                                   |                     |                                      |                                                                     | 21             | 3                                                            | 3                                                            |
|                  |            |                                      |                                                              |                                                                   |                     |                                      |                                                                     | 22             | 5                                                            | 5                                                            |
|                  |            |                                      |                                                              |                                                                   |                     |                                      |                                                                     | 23             | 5                                                            | 5                                                            |
| 55 <sup>c</sup>  | other      | yes                                  | yes                                                          | > 20 guidelines                                                   | > 5 years           | yes                                  | Assessment of guideline quality                                     | 1              | 5                                                            | 3                                                            |
|                  |            |                                      |                                                              |                                                                   |                     |                                      |                                                                     | 2              | 5                                                            | 3                                                            |
|                  |            |                                      |                                                              |                                                                   |                     |                                      |                                                                     | 3              | 5                                                            | 5                                                            |
|                  |            |                                      |                                                              |                                                                   |                     |                                      |                                                                     | 4              | 5                                                            | 5                                                            |
|                  |            |                                      |                                                              |                                                                   |                     |                                      |                                                                     | 5              | 5                                                            | 5                                                            |
|                  |            |                                      |                                                              |                                                                   |                     |                                      |                                                                     | 6              | 5                                                            | 5                                                            |
|                  |            |                                      |                                                              |                                                                   |                     |                                      |                                                                     | 7              | -                                                            | -                                                            |
|                  |            |                                      |                                                              |                                                                   |                     |                                      |                                                                     | 8              | -                                                            | -                                                            |
|                  |            |                                      |                                                              |                                                                   |                     |                                      |                                                                     | 9              | -                                                            | -                                                            |
|                  |            |                                      |                                                              |                                                                   |                     |                                      |                                                                     | 10             | -                                                            | -                                                            |
|                  |            |                                      |                                                              |                                                                   |                     |                                      |                                                                     | 11             | -                                                            | -                                                            |
|                  |            |                                      |                                                              |                                                                   |                     |                                      |                                                                     | 12             | -                                                            | -                                                            |
|                  |            |                                      |                                                              |                                                                   |                     |                                      |                                                                     | 13             | -                                                            | -                                                            |
|                  |            |                                      |                                                              |                                                                   |                     |                                      |                                                                     | 14             | -                                                            | -                                                            |
|                  |            |                                      |                                                              |                                                                   |                     |                                      |                                                                     | 15             | -                                                            | -                                                            |
|                  |            |                                      |                                                              |                                                                   |                     |                                      |                                                                     | 16             | -                                                            | -                                                            |

| No of respondent | Profession                        | Knowledge of the AGREE II instrument | Performance of appraisals using the AGREE I or II instrument | Number of appraised guidelines using the AGREE I or II instrument | Experience in years | Involvement in guideline development | Purpose of conducting appraisals using the AGREE I or II instrument | AGREE II Items | Assessment of the influence on <u>methodological quality</u> | Assessment of the influence on <u>recommendation for use</u> |
|------------------|-----------------------------------|--------------------------------------|--------------------------------------------------------------|-------------------------------------------------------------------|---------------------|--------------------------------------|---------------------------------------------------------------------|----------------|--------------------------------------------------------------|--------------------------------------------------------------|
|                  |                                   |                                      |                                                              |                                                                   |                     |                                      |                                                                     | 17             | -                                                            | -                                                            |
|                  |                                   |                                      |                                                              |                                                                   |                     |                                      |                                                                     | 18             | -                                                            | -                                                            |
|                  |                                   |                                      |                                                              |                                                                   |                     |                                      |                                                                     | 19             | -                                                            | -                                                            |
|                  |                                   |                                      |                                                              |                                                                   |                     |                                      |                                                                     | 20             | -                                                            | -                                                            |
|                  |                                   |                                      |                                                              |                                                                   |                     |                                      |                                                                     | 21             | -                                                            | -                                                            |
|                  |                                   |                                      |                                                              |                                                                   |                     |                                      |                                                                     | 22             | -                                                            | -                                                            |
|                  |                                   |                                      |                                                              |                                                                   |                     |                                      |                                                                     | 23             | -                                                            | -                                                            |
| 56 <sup>c</sup>  | Physician / methodological expert | yes                                  | yes                                                          | < 10 guidelines                                                   | 1-5 years           | yes                                  | Assessment of guideline quality                                     | 1              | 5                                                            | 5                                                            |
|                  |                                   |                                      |                                                              |                                                                   |                     |                                      |                                                                     | 2              | 5                                                            | 5                                                            |
|                  |                                   |                                      |                                                              |                                                                   |                     |                                      |                                                                     | 3              | 5                                                            | 4                                                            |
|                  |                                   |                                      |                                                              |                                                                   |                     |                                      |                                                                     | 4              | 4                                                            | 4                                                            |
|                  |                                   |                                      |                                                              |                                                                   |                     |                                      |                                                                     | 5              | 4                                                            | 4                                                            |
|                  |                                   |                                      |                                                              |                                                                   |                     |                                      |                                                                     | 6              | 4                                                            | 4                                                            |
|                  |                                   |                                      |                                                              |                                                                   |                     |                                      |                                                                     | 7              | 5                                                            | 5                                                            |
|                  |                                   |                                      |                                                              |                                                                   |                     |                                      |                                                                     | 8              | 5                                                            | 5                                                            |
|                  |                                   |                                      |                                                              |                                                                   |                     |                                      |                                                                     | 9              | 4                                                            | 4                                                            |
|                  |                                   |                                      |                                                              |                                                                   |                     |                                      |                                                                     | 10             | 5                                                            | 5                                                            |
|                  |                                   |                                      |                                                              |                                                                   |                     |                                      |                                                                     | 11             | 4                                                            | 5                                                            |
|                  |                                   |                                      |                                                              |                                                                   |                     |                                      |                                                                     | 12             | 5                                                            | 5                                                            |
|                  |                                   |                                      |                                                              |                                                                   |                     |                                      |                                                                     | 13             | 4                                                            | 4                                                            |
|                  |                                   |                                      |                                                              |                                                                   |                     |                                      |                                                                     | 14             | 5                                                            | 5                                                            |

| No of respondent | Profession            | Knowledge of the AGREE II instrument | Performance of appraisals using the AGREE I or II instrument | Number of appraised guidelines using the AGREE I or II instrument | Experience in years | Involvement in guideline development | Purpose of conducting appraisals using the AGREE I or II instrument | AGREE II Items | Assessment of the influence on <u>methodological quality</u> | Assessment of the influence on <u>recommendation for use</u> |
|------------------|-----------------------|--------------------------------------|--------------------------------------------------------------|-------------------------------------------------------------------|---------------------|--------------------------------------|---------------------------------------------------------------------|----------------|--------------------------------------------------------------|--------------------------------------------------------------|
|                  |                       |                                      |                                                              |                                                                   |                     |                                      |                                                                     | 15             | 4                                                            | 5                                                            |
|                  |                       |                                      |                                                              |                                                                   |                     |                                      |                                                                     | 16             | 4                                                            | 5                                                            |
|                  |                       |                                      |                                                              |                                                                   |                     |                                      |                                                                     | 17             | 5                                                            | 5                                                            |
|                  |                       |                                      |                                                              |                                                                   |                     |                                      |                                                                     | 18             | -                                                            | -                                                            |
|                  |                       |                                      |                                                              |                                                                   |                     |                                      |                                                                     | 19             | -                                                            | -                                                            |
|                  |                       |                                      |                                                              |                                                                   |                     |                                      |                                                                     | 20             | -                                                            | -                                                            |
|                  |                       |                                      |                                                              |                                                                   |                     |                                      |                                                                     | 21             | -                                                            | -                                                            |
|                  |                       |                                      |                                                              |                                                                   |                     |                                      |                                                                     | 22             | -                                                            | -                                                            |
|                  |                       |                                      |                                                              |                                                                   |                     |                                      |                                                                     | 23             | -                                                            | -                                                            |
| 57               | methodological expert | yes                                  | yes                                                          | > 20 guidelines                                                   | > 5 years           | yes                                  | Assessment of guideline quality                                     | 1              | 4                                                            | 3                                                            |
|                  |                       |                                      |                                                              |                                                                   |                     |                                      |                                                                     | 2              | 4                                                            | 4                                                            |
|                  |                       |                                      |                                                              |                                                                   |                     |                                      |                                                                     | 3              | 5                                                            | 5                                                            |
|                  |                       |                                      |                                                              |                                                                   |                     |                                      |                                                                     | 4              | 5                                                            | 5                                                            |
|                  |                       |                                      |                                                              |                                                                   |                     |                                      |                                                                     | 5              | 4                                                            | 4                                                            |
|                  |                       |                                      |                                                              |                                                                   |                     |                                      |                                                                     | 6              | 5                                                            | 5                                                            |
|                  |                       |                                      |                                                              |                                                                   |                     |                                      |                                                                     | 7              | 5                                                            | 5                                                            |
|                  |                       |                                      |                                                              |                                                                   |                     |                                      |                                                                     | 8              | 5                                                            | 5                                                            |
|                  |                       |                                      |                                                              |                                                                   |                     |                                      |                                                                     | 9              | 5                                                            | 5                                                            |
|                  |                       |                                      |                                                              |                                                                   |                     |                                      |                                                                     | 10             | 5                                                            | 5                                                            |
|                  |                       |                                      |                                                              |                                                                   |                     |                                      |                                                                     | 11             | 5                                                            | 5                                                            |
|                  |                       |                                      |                                                              |                                                                   |                     |                                      |                                                                     | 12             | 5                                                            | 5                                                            |

| No of respondent | Profession | Knowledge of the AGREE II instrument | Performance of appraisals using the AGREE I or II instrument | Number of appraised guidelines using the AGREE I or II instrument | Experience in years | Involvement in guideline development | Purpose of conducting appraisals using the AGREE I or II instrument | AGREE II Items | Assessment of the influence on <u>methodological quality</u> | Assessment of the influence on <u>recommendation for use</u> |
|------------------|------------|--------------------------------------|--------------------------------------------------------------|-------------------------------------------------------------------|---------------------|--------------------------------------|---------------------------------------------------------------------|----------------|--------------------------------------------------------------|--------------------------------------------------------------|
|                  |            |                                      |                                                              |                                                                   |                     |                                      |                                                                     | 13             | 5                                                            | 5                                                            |
|                  |            |                                      |                                                              |                                                                   |                     |                                      |                                                                     | 14             | 4                                                            | 4                                                            |
|                  |            |                                      |                                                              |                                                                   |                     |                                      |                                                                     | 15             | 4                                                            | 4                                                            |
|                  |            |                                      |                                                              |                                                                   |                     |                                      |                                                                     | 16             | 4                                                            | 4                                                            |
|                  |            |                                      |                                                              |                                                                   |                     |                                      |                                                                     | 17             | 4                                                            | 4                                                            |
|                  |            |                                      |                                                              |                                                                   |                     |                                      |                                                                     | 18             | 2                                                            | 2                                                            |
|                  |            |                                      |                                                              |                                                                   |                     |                                      |                                                                     | 19             | 2                                                            | 2                                                            |
|                  |            |                                      |                                                              |                                                                   |                     |                                      |                                                                     | 20             | 2                                                            | 2                                                            |
|                  |            |                                      |                                                              |                                                                   |                     |                                      |                                                                     | 21             | 2                                                            | 2                                                            |
|                  |            |                                      |                                                              |                                                                   |                     |                                      |                                                                     | 22             | 5                                                            | 5                                                            |
|                  |            |                                      |                                                              |                                                                   |                     |                                      |                                                                     | 23             | 5                                                            | 5                                                            |
| 58               | other      | yes                                  | yes                                                          | 10-20 guidelines                                                  | 1-5 years           | no                                   | Publication of scientific articles                                  | 1              | 4                                                            | 4                                                            |
|                  |            |                                      |                                                              |                                                                   |                     |                                      |                                                                     | 2              | 4                                                            | 4                                                            |
|                  |            |                                      |                                                              |                                                                   |                     |                                      |                                                                     | 3              | 2                                                            | 4                                                            |
|                  |            |                                      |                                                              |                                                                   |                     |                                      |                                                                     | 4              | 4                                                            | 4                                                            |
|                  |            |                                      |                                                              |                                                                   |                     |                                      |                                                                     | 5              | 4                                                            | 4                                                            |
|                  |            |                                      |                                                              |                                                                   |                     |                                      |                                                                     | 6              | 4                                                            | 4                                                            |
|                  |            |                                      |                                                              |                                                                   |                     |                                      |                                                                     | 7              | 5                                                            | 5                                                            |
|                  |            |                                      |                                                              |                                                                   |                     |                                      |                                                                     | 8              | 5                                                            | 5                                                            |
|                  |            |                                      |                                                              |                                                                   |                     |                                      |                                                                     | 9              | 5                                                            | 5                                                            |
|                  |            |                                      |                                                              |                                                                   |                     |                                      |                                                                     | 10             | 4                                                            | 4                                                            |

| No of respondent | Profession | Knowledge of the AGREE II instrument | Performance of appraisals using the AGREE I or II instrument | Number of appraised guidelines using the AGREE I or II instrument | Experience in years | Involvement in guideline development | Purpose of conducting appraisals using the AGREE I or II instrument | AGREE II Items | Assessment of the influence on <u>methodological quality</u> | Assessment of the influence on <u>recommendation for use</u> |
|------------------|------------|--------------------------------------|--------------------------------------------------------------|-------------------------------------------------------------------|---------------------|--------------------------------------|---------------------------------------------------------------------|----------------|--------------------------------------------------------------|--------------------------------------------------------------|
|                  |            |                                      |                                                              |                                                                   |                     |                                      |                                                                     | 11             | 4                                                            | 4                                                            |
|                  |            |                                      |                                                              |                                                                   |                     |                                      |                                                                     | 12             | 5                                                            | 5                                                            |
|                  |            |                                      |                                                              |                                                                   |                     |                                      |                                                                     | 13             | 4                                                            | 4                                                            |
|                  |            |                                      |                                                              |                                                                   |                     |                                      |                                                                     | 14             | 5                                                            | 5                                                            |
|                  |            |                                      |                                                              |                                                                   |                     |                                      |                                                                     | 15             | 5                                                            | 5                                                            |
|                  |            |                                      |                                                              |                                                                   |                     |                                      |                                                                     | 16             | 4                                                            | 4                                                            |
|                  |            |                                      |                                                              |                                                                   |                     |                                      |                                                                     | 17             | 5                                                            | 5                                                            |
|                  |            |                                      |                                                              |                                                                   |                     |                                      |                                                                     | 18             | 4                                                            | 4                                                            |
|                  |            |                                      |                                                              |                                                                   |                     |                                      |                                                                     | 19             | 4                                                            | 4                                                            |
|                  |            |                                      |                                                              |                                                                   |                     |                                      |                                                                     | 20             | 4                                                            | 4                                                            |
|                  |            |                                      |                                                              |                                                                   |                     |                                      |                                                                     | 21             | 4                                                            | 4                                                            |
|                  |            |                                      |                                                              |                                                                   |                     |                                      |                                                                     | 22             | 4                                                            | 4                                                            |
|                  |            |                                      |                                                              |                                                                   |                     |                                      |                                                                     | 23             | 4                                                            | 4                                                            |

a: These respondents provided no evaluation of the influence of the AGREE II items.

b: These respondents reported that they had no knowledge of AGREE II. Two of them still answer the further questions. These results were excluded from further analysis.

c: These respondents discontinued their evaluation of the influence of the AGREE II items at Item 7 and Item 8.
